# Supplementary material
Source: PubMed Central journal article supplement (PMC4788206)
Supplement: brop000175.w1_default.pdf [file brop000175.w1_default.pdf]

## Supplementary file: Appendices

### Table of Contents

|                                                                                                                                                                                         |    |
|-----------------------------------------------------------------------------------------------------------------------------------------------------------------------------------------|----|
| Appendix 1: Study protocol.....                                                                                                                                                         | 3  |
| Appendix 2: Outcome variables requiring clinical review and coding.....                                                                                                                 | 11 |
| Appendix 3: Data collection forms.....                                                                                                                                                  | 12 |
| Figure 4.1: Planned home birth data collection form.....                                                                                                                                | 13 |
| Figure 4.2: Planned obstetric unit data collection form.....                                                                                                                            | 21 |
| Figure 3.3: Obstetric unit transfer form.....                                                                                                                                           | 29 |
| Figure 3.4: Multiple maternal transfer form.....                                                                                                                                        | 31 |
| Figure 3.5: Neonatal morbidity form.....                                                                                                                                                | 33 |
| Figure 3.6: Maternal morbidity form.....                                                                                                                                                | 42 |
| Appendix 4: Categorisation of potential confounders.....                                                                                                                                | 48 |
| Table 4.1: Categorisation of potential confounders.....                                                                                                                                 | 48 |
| Appendix 5: Sensitivity analysis, trusts/units with a response rate of at least 85%.....                                                                                                | 49 |
| Table 5.1: Proportion of units and trusts with a response rate $\geq 85\%$ by planned place of birth.....                                                                               | 49 |
| Table 5.2: Proportion of women included by response rate and planned place of birth.....                                                                                                | 49 |
| Table 5.3: Morbidity form return rates for units/trusts with response rate of at least 85%.....                                                                                         | 49 |
| Table 5.4: Primary outcome for babies of 'low risk' women restricted to units with a response rate of at least 85%.....                                                                 | 50 |
| Appendix 6: Sensitivity analysis, propensity score analysis.....                                                                                                                        | 51 |
| Figure 6.1: Covariate imbalance between planned home births and planned obstetric unit births.....                                                                                      | 52 |
| Figure 6.2: Covariate imbalance between planned alongside midwifery unit births and planned obstetric unit births.....                                                                  | 52 |
| Figure 6.3: Covariate imbalance between planned freestanding midwifery unit births and planned obstetric unit births.....                                                               | 52 |
| Figure 6.4: Distribution of propensity scores for planned home births and planned obstetric unit births.....                                                                            | 53 |
| Figure 6.5: Distribution of propensity scores for planned alongside midwifery unit births and planned obstetric unit births.....                                                        | 53 |
| Figure 6.6: Distribution of propensity scores for planned freestanding midwifery unit births and planned obstetric unit births.....                                                     | 53 |
| Figure 6.7: Covariate imbalance between planned home births and planned OU births within propensity score quintile.....                                                                 | 54 |
| Figure 6.8: Covariate imbalance between planned alongside midwifery unit births and planned obstetric unit births within propensity score quintile.....                                 | 55 |
| Figure 6.9: Covariate imbalance between planned freestanding midwifery unit births and planned obstetric unit births within propensity score quintile.....                              | 56 |
| Table 6.1: Primary outcome for babies of all 'low risk' women for planned home births compared with planned obstetric unit births by propensity score quintile.....                     | 57 |
| Table 6.2: Primary outcome for babies of all 'low risk' women for planned alongside midwifery unit births compared with planned obstetric unit births by propensity score quintile..... | 57 |

|                                                                                                                                                                                             |    |
|---------------------------------------------------------------------------------------------------------------------------------------------------------------------------------------------|----|
| Table 6.3: Primary outcome for babies of all 'low risk' women for planned freestanding midwifery unit births compared with planned obstetric unit births by propensity score quintile ..... | 57 |
| Appendix 7: Summary of missing data.....                                                                                                                                                    | 58 |
| Table 7.1: Summary of missing 'risk status' data for all women by planned place of birth .....                                                                                              | 58 |
| Table 7.2: Summary of missing data for all 'low risk' women by planned place of birth.....                                                                                                  | 58 |
| Table 7.3: Missing primary outcome data for all 'low risk' women by planned place of birth.....                                                                                             | 59 |
| Table 7.4: Missing data for potential confounders for all 'low risk' women by planned place of birth.....                                                                                   | 59 |
| Table 7.5: Distribution of missing primary outcome data for all 'low risk' women by baseline characteristic.....                                                                            | 60 |
| Appendix 8: Supplementary results tables.....                                                                                                                                               | 61 |
| Table 8.1: Occurrence of the components of the primary outcome.....                                                                                                                         | 61 |
| Table 8.2: Components of the primary outcome for all 'low risk' women by planned place of birth.....                                                                                        | 61 |
| Table 8.3: Components of the primary outcome for 'low risk' women without complicating conditions identified at the start of care in labour by planned place of birth .....                 | 61 |
| Table 8.4: Perinatal outcomes for babies of all 'low risk' women by planned place of birth.....                                                                                             | 62 |
| Table 8.5: Perinatal outcomes for 'low risk' women by planned place of birth and parity .....                                                                                               | 64 |
| Table 8.6: Maternal outcomes for 'low risk' women by planned place of birth and parity.....                                                                                                 | 69 |
| Appendix 9: The Birthplace in England Collaborative Group.....                                                                                                                              | 73 |
| Appendix references .....                                                                                                                                                                   | 77 |

## Appendix 1: Study protocol

The Birthplace in England Research Programme: study protocol for the Birthplace national prospective cohort study of planned place of birth

### Background

Maternity services in England are provided by the NHS and are free of charge at the point of care. NHS midwives and doctors provide care for more than 99% of all births.<sup>1</sup>

Since the Changing Childbirth report in 1993, maternity care policy has aimed to be responsive to women's needs and enable women to make informed choices about their care.<sup>2</sup> This policy direction has continued with the Maternity Standard of the National Service Framework (NSF) for Children, Young People and Maternity Services.<sup>3</sup> Maternity Matters, the implementation plan for the NSF, consolidated this policy direction for maternity care and stated that by the end of 2009, depending on their circumstances, a woman and her partner should be able to choose where they wish to give birth: at home, in a local midwifery unit or in an obstetric unit.<sup>4</sup>

Reviews of research have identified that there is no accurate quantification of the risk of adverse outcomes associated with births planned in the different settings. One major problem in interpreting much of the evidence is that actual place of birth is often used to make inferences about planned place of birth.<sup>5-8</sup>

### Birth at home

A Cochrane systematic review of home versus hospital birth identified only one randomised controlled trial which included 11 women and was unable to detect any differences in safety or other outcomes between the two settings.<sup>9</sup> A meta-analysis of six observational studies examined perinatal outcomes for 24,092 'low risk' women and their babies.<sup>10</sup> No difference was observed for perinatal mortality. However, there was evidence that women planning birth at home had a lower risk of induction, augmentation, instrumental vaginal birth, caesarean section, episiotomy, severe perineal lacerations and that their babies were less likely to have low Apgar scores.

The results of several large observational studies comparing home births with birth in an obstetric unit have been published since the Birthplace Research Programme began in 2007. A retrospective cohort study from the Netherlands using routine data from over 500,000 women found no evidence of a difference in perinatal mortality or morbidity between 'low risk' women who planned to give birth at home and 'low risk' women who planned to give birth in hospital.<sup>11</sup> Canadian and Swedish studies of planned home births compared to planned hospital births for 'low risk' women also showed no difference in perinatal mortality.<sup>12, 13</sup> Lower rates of obstetric interventions were observed in the planned home birth group for both studies. However, both studies included fewer than 20,000 births and lacked statistical power to demonstrate differences in rare but important adverse outcomes. A study from England and Wales attempted to quantify the intrapartum-related perinatal mortality rates for booked home births from 1994 to 2003 using routine statistics.<sup>14</sup> However, the data available were of poor quality for this comparison and highlighted the need for a more accurate quantification of the risks associated with each planned place of birth. A recent meta-analysis found planned home births, compared to planned hospital births, were associated with less medical intervention, had a similar perinatal mortality rate and an increased neonatal mortality rate.<sup>15</sup> This study has been criticized for failing to report the assessment of the quality of the studies included.<sup>16</sup>

### Births in midwifery units

NHS midwifery units provide midwife-led care for women who are at 'low risk' of complications at the start of care in labour.<sup>17</sup> Freestanding midwifery units are on a site geographically separate from an obstetric unit. Alongside midwifery units are in the same building or on the same site as an obstetric unit.

A Cochrane systematic review comparing birth in alternative birth settings with conventional institutional settings (obstetric units) included nine randomised controlled trials and 10,684 women.<sup>18</sup> The alternative birth settings had features in common with the units that we define as alongside midwifery units. The alternative birth settings were associated with an increased likelihood of spontaneous vaginal birth, increased maternal satisfaction and fewer medical interventions during labour and birth. There was no association between birth setting and severe perinatal morbidity or mortality. Also, there was no association between birth setting and serious maternal morbidity or mortality. However, it is likely that the review was underpowered to detect any

differences in rare but important severe adverse perinatal and maternal outcomes. No trials of freestanding midwifery units were included in the review.

Prospective observational studies show a lower rate of intervention during labour for births planned in freestanding midwifery units.<sup>8, 19</sup>

It is difficult to draw clear conclusions about the effect of planned place of birth on outcomes due to differences in the health care systems in which studies were undertaken, the heterogeneity of studies, poor study design and the use of varied outcome measures. High quality evidence about the risks and benefits associated with the different settings for birth should be available to women. The National Institute for Health and Clinical Excellence's (NICE) clinical guidance on Intrapartum Care included guidance on planning place of birth and stated that "Of particular concern is the lack of reliable data, relating to relatively rare but serious outcomes such as perinatal mortality that is directly related to intrapartum events or serious maternal morbidity in all places of birth".<sup>20</sup> It is in this context that the Birthplace in England Research Programme has been designed to compare the safety of the settings for birth supported by the NHS in England (<http://www.npeu.ox.ac.uk/birthplace>).

### **Aim**

To compare aspects of the safety of birth by planned place of birth at the start of care in labour: at home, in freestanding midwifery units, in alongside midwifery units and in obstetric units in England.

### **Primary objective**

To compare intrapartum and early neonatal mortality and specific neonatal morbidities for births planned at home, in freestanding midwifery units and in alongside midwifery units with births planned in obstetric units, for babies of women judged to be at 'low risk' of complications at labour onset.

Using births planned in obstetric units as the reference group will maximise statistical efficiency as the highest number of births will be included from these units. This does not imply obstetric units are assumed to be the standard or optimal places of care.

### **Secondary objectives**

To compare the following for births planned at home, in freestanding midwifery units and in alongside midwifery units with births planned in obstetric units:

1. Maternal morbidity for women judged to be at 'low risk' of complications at labour onset
2. Intrapartum and early neonatal mortality and specific neonatal morbidities for babies of all women, irrespective of risk status at labour onset.
3. Maternal morbidity for all women, irrespective of risk status at labour onset.
4. Intrapartum and early neonatal mortality and specific neonatal morbidities for babies of women at 'higher risk' of complications at labour onset.
5. Maternal morbidity for women at 'higher risk' of complications at labour onset.
6. Maternal birth interventions for women judged to be at 'low risk' of complications at labour onset.

Also, using the planned birth at home group as the comparison group:

7. To compare perinatal and maternal outcomes for 'low risk' women who transfer from home, freestanding midwifery units and alongside midwifery units, during or immediately after labour.
8. To quantify any associations between indication for transfer, time from decision making until transfer, duration of transfer or events after transfer (including the time taken to be assessed by an obstetrician) and perinatal or maternal outcomes for babies and women who are transferred during or immediately after labour.

### **Design**

The study design is a prospective cohort study with planned place of birth at the start of care in labour as the exposure and a composite measure of intrapartum and early neonatal mortality and specific neonatal morbidities as the primary outcome.

### **Definitions**

**'Low risk':** Women will be classified as 'low risk' if they do not have any of the medical conditions or situations listed in the NICE Intrapartum Care guidelines that result in "increased risk for the woman or baby during or shortly after labour, where care in an obstetric unit would be expected to reduce this risk".<sup>20</sup> These risk factors are listed on page 4 of the Birthplace data collection form.



**‘Higher risk’:** Women will be classified as ‘higher risk’ if they have any of the medical conditions or situations listed in the NICE Intrapartum Care guidelines.

**Births planned at home:** a birth which occurs for a woman who, at the start of care in labour, intended to give birth at home and who received care from a midwife during established labour at home, regardless of where the woman actually gives birth. This includes women who make their final decision about planned place of birth during labour.

**Births planned in a freestanding midwifery unit:** a birth which occurs for a woman who, at the start of care in labour, intended to give birth in a freestanding midwifery unit and who received care from a midwife during established labour in a freestanding midwifery unit, regardless of where the woman actually gives birth. Freestanding midwifery units are defined as being on a separate geographical site from an obstetric unit and transfer will normally be by ambulance or car.<sup>21</sup>

**Births planned in an alongside midwifery unit:** a birth which occurs for a woman who, at the start of care in labour, intended to give birth in an alongside midwifery unit and who received care from a midwife during established labour in an alongside midwifery unit, regardless of where the woman actually gives birth. Alongside midwifery units are defined as being in the same building or on the same geographical site as an obstetric unit and transfer will normally be by trolley, bed or wheelchair.<sup>21</sup>

**Births planned in an obstetric unit:** a birth which occurs for a woman who, at the start of care in labour, intended to give birth in an obstetric unit and who received care from a midwife during established labour in an obstetric unit.

#### **Inclusion criteria**

All women who are attended by an NHS midwife during labour in their planned place of birth, for any amount of time, are eligible for inclusion in the study except for:

- women who have a caesarean section before the start of labour
- women who present in labour before 37 weeks and 0 days gestation
- women with a multiple pregnancy
- women who have had no antenatal care

Data will be collected for all women planning birth at home, in a freestanding midwifery unit or in an alongside midwifery unit who are attended by an NHS midwife during labour. Women with any of the exclusion criteria listed above will not be included in the analyses.

Data will not be collected for women who have an unplanned birth at home.

#### **Study sites**

The aim is to collect data about planned home births in every NHS trust in England. All midwifery units in England, both freestanding and alongside, will be invited to participate and a stratified random sample of thirty seven obstetric units will be invited to participate. Obstetric units will be stratified by size (<2600 births, 2600-4850 births and >4850 births per year) and geographic location (northern England or southern England). Data from the Department of Geography at the University of Sheffield were used to define northern and southern England.<sup>22</sup> The classification of obstetric units as northern or southern and the size categories were chosen to help ensure that the sample is broadly representative of obstetric units in England. Data from a national mapping survey of all NHS trusts providing maternity care in England provided the sampling frame for the selection of the obstetric units. These mapping data were collected as part of the Birthplace Research Programme in collaboration with the Healthcare Commission’s review of maternity services in 2007.<sup>23</sup>

#### **Research ethics approval**

The Berkshire Research Ethics Committee gave approval for the study in October 2007 (reference number: 07/H0505/151). An amendment to the original protocol was approved by a sub-committee of the Berkshire Research Ethics Committee in April 2008.

As part of the approval, individual women will not be asked to give consent to participate. All of the data that will be collected are routinely recorded in the maternity, postnatal or neonatal notes and no personally identifiable data will be sent to the study coordinating centre. In addition, the process of seeking and obtaining

consent would be likely to introduce substantial bias in the composition of the comparison groups and the care women receive will not change in any way as a result of the study.

### **Primary outcome**

The primary outcome is a composite outcome of stillbirth after the start of care in labour, early neonatal death (<7 days), neonatal encephalopathy defined as either a clinical diagnosis of neonatal encephalopathy or admission to a neonatal unit within 48 hours of birth for at least 48 hours with evidence of feeding difficulties or respiratory distress, meconium aspiration syndrome, brachial plexus injury, fractured humerus or clavicle.

A composite outcome will give the study more power to detect differences in safety between planned places of birth than a single outcome, which would have a lower incidence. The results could be misleading if the exposure affects different outcomes in different ways. For example, if the effect of planned place of birth in a particular setting decreased deaths but resulted in increased significant morbidity there might be no difference observed in the primary outcome, even though deaths were being prevented in one setting. The likelihood of this occurring is small and the increased statistical power of using a composite outcome outweighs the alternative approach of substantially increasing the sample size to address individual components of the primary outcome.

The signs of mild encephalopathy can be subtle and include respiratory difficulty and poor feeding rather than features more specifically associated with encephalopathy. Since this is a mature group of babies, any difference in the incidence of neonatal unit admissions for these outcomes is likely to result from differences in the incidence of perinatal asphyxia.

### **Secondary outcomes**

The perinatal outcomes that will be investigated are stillbirth after the start of care in labour; early neonatal death (<7 days); a clinical diagnosis of neonatal encephalopathy or admission to a neonatal unit within 48 hours of birth for at least 48 hours with evidence of feeding difficulties or respiratory distress; a clinical diagnosis of neonatal encephalopathy; admission to a neonatal unit within 48 hours of birth for at least 48 hours with evidence of feeding difficulties or respiratory distress; meconium aspiration syndrome; brachial plexus injury; fractured humerus; fractured clavicle; fractured skull; cephalohaematoma; cerebral haemorrhage; early onset neonatal sepsis (within 48 hours of birth); kernicterus (severe bilirubin encephalopathy); seizures; neonatal unit admission; Apgar score less than seven at five minutes; and breastfeeding initiation.

Only diagnosed fractures will be included. Minor fractures, particularly of the clavicle, are often missed and have little or no clinical significance.

The maternal outcomes that will be investigated are mode of birth; normal birth; third or fourth degree perineal trauma; blood transfusion; admission to an intensive therapy unit, high dependency unit or specialist unit; and maternal death (within 42 days of giving birth).

The interventions in labour that will be investigated are syntocinon augmentation; immersion in water for pain relief; epidural or spinal analgesia; general anaesthetic; active management of the third stage of labour; and episiotomy.

Normal birth is defined as a birth with none of the following interventions: induction of labour; epidural or spinal analgesia; general anaesthetic; forceps or ventouse; caesarean section; episiotomy.<sup>24</sup>

### **Data collection**

Data collection will be coordinated by the National Perinatal Epidemiology Unit at the University of Oxford. A National Lead Research Midwife and four Regional Lead Midwives will train a local coordinator at each unit. Study documentation and data collection forms will be posted to each local coordinator from the coordinating centre in Oxford. Contact with each of the study coordinators will be maintained throughout the data collection period by phone, email, regional meetings and site visits by the National and Regional Lead Midwives.

Local coordinators will manage data collection within their trust (for home births) or unit. The majority of local coordinators will be midwives from the trust or unit. The local coordinators will be responsible for running Birthplace within their trust or unit: ensuring that all midwives are informed about Birthplace and have access to data collection forms, keeping a record of the number of eligible women, collecting completed data collection forms from their midwives, checking over data collection forms for completeness, posting completed data collection forms for data entry and responding to any data queries sent from the coordinating centre.

The attending midwife will start a data collection form for each eligible woman during labour care and the forms will be completed after the birth, using information recorded in the woman's maternity notes. Outcomes for women and babies who are transferred from their planned place of birth during or immediately after labour will also be collected.

More detailed information will be collected on mothers and babies that have morbidity identified. An extra data collection form will be used to measure the severity of the adverse outcomes and the resources used to care for these women and babies (supplementary data file 2). These forms will be completed using the maternal and neonatal notes, with help from the neonatal team when necessary.

To ensure as many eligible women as possible are included, the number of women included from each site will be compared with appropriate local records, including records of planned home births, delivery suite and theatre registers and records of transfers to obstetric care. Many trusts do not keep comprehensive records of women planning to give birth at home. For this reason, the local coordinator responsible for collecting data on planned home births in each trust will keep a prospective register of all women eligible for Birthplace. These registers will provide further assurance that the majority of eligible women are identified and included.

Data for eligible women who are missed will be collected retrospectively, using the maternal and neonatal notes as necessary. Double data entry will be used to minimize data entry errors.

### **Sample size**

Major perinatal and maternal morbidity are rare in women judged to be at 'low risk' of complications at the start of care in labour. The incidence of neonatal encephalopathy at term is approximately 1.8 per 1,000 live births.<sup>25</sup> However, the incidence of intrapartum stillbirth after labour onset, early neonatal death and other related neonatal morbidity at term for babies of women at 'low risk' of complications at the start of care in labour is much less certain. A reasonable estimate of the incidence of the composite primary outcome is 3.6 per 1,000 births. As the vast majority of data on neonatal morbidity are from obstetric units, this estimate is assumed to be the incidence of the primary outcome in obstetric units.

In order to have adequate power to detect clinically important differences in outcome that are associated with planned place of birth, the study will need to collect data on at least 20,000 'low risk' women planning to give birth in an obstetric unit, at least 17,000 women planning to give birth at home and at least 5,000 women planning to give birth in each type of midwifery unit.

The study aims to collect data on at least 85% of all eligible women planning birth at home over approximately 16 months, which we estimate to be 17,000 women. With data from 17,000 planned home births, it will be possible to detect an increase in the incidence of the primary outcome from 3.6 per 1,000 births in obstetric units to 5.7 per 1,000 for planned home births, with a 5% two-sided level of significance and 82% power. Alternatively, the study will be able to detect a reduction in the incidence of the primary outcome from 3.6 per 1,000 births in obstetric units to 2.0 per 1,000 births for planned home births, with a 5% two-sided level of significance and 80% power.

Data collection is planned for at least 6 months in each type of midwifery unit, which will allow a minimum of 5,000 women from each type of unit to be included. Freestanding and alongside midwifery units will be analysed separately when being compared to obstetric units. With 5,000 women included from each type of midwifery unit, the study will be able to detect an increase in the incidence of the primary outcome from 3.6 per 1,000 births in obstetric units to 6.8 per 1,000 in midwifery units, with a 5% two-sided level of significance and 80% power. Alternatively, the study will be able to detect a reduction in the incidence of the primary outcome from 3.6 per 1,000 births in obstetric units to 1.2 per 1,000 births in midwifery units, with a 5% two-sided level of significance and 80% power.

The study will also be able to detect much more modest differences in relatively common serious outcomes of maternal morbidity amongst women at 'low risk' of complications, such as blood transfusion which affects approximately 0.5% of women, and 3rd and 4th degree perineal trauma which is experienced by 1.2% of women.<sup>26, 27</sup>

## **Analysis**

Categorising data by women's planned place of birth at the start of care in labour is appropriate because risk assessment and transfer are important elements of the quality of care provided to women planning birth out of hospital. The characteristics of the women who planned birth in each setting will be described. Odds ratios will be calculated to compare outcomes by planned place of birth using the obstetric unit women as the reference comparison group. Crude odds ratios will be presented for the primary outcome with 95% confidence intervals. These crude odds ratios will be adjusted in a logistic regression model to take account of potential confounders such as maternal age, ethnic group, understanding of English, marital or partner status, BMI in pregnancy, index of multiple deprivation score, parity and gestation at delivery. The analysis will be weighted to take into account the duration of each home birth trust's and each unit's participation. The clustered nature of the data, within trusts for home births and within units for the other settings, will be taken into account in the analysis. Taking these factors into account will ensure that accurate point estimates and confidence intervals are obtained.

Secondary outcomes will be analysed in the same way as the primary outcome. Odds ratios calculated for the secondary outcomes will be presented with 99% confidence intervals. Since a large number of comparisons will be made it is important to use wider confidence intervals to reduce the likelihood of finding statistically significant associations by chance.

A predefined subgroup analysis will be performed based on outcomes stratified by parity, nulliparous and multiparous. A test for heterogeneity will be performed to investigate whether any differences in outcomes, by planned place of birth, between nulliparous and multiparous women are likely to have been due to chance.

For the primary outcome, a number of sensitivity analyses will be performed to assess the robustness of the results to factors which may introduce bias. These will include: i) restricting the analysis to centres that provided data for at least 85% of eligible women; ii) using propensity score methods for a stratified or restricted analysis based on the likelihood of women giving birth in each setting; and iii) using multiple imputation to include women who have data missing for any of the potentially confounding variables about their characteristics.

Further exploratory analysis will be performed to generate hypotheses for future research.

## References

1. Office for National Statistics. Birth statistics: Births and patterns of family building England and Wales (FM1 No. 36 – 2007). Newport: 2008.
2. Department of Health. Changing Childbirth, Part 1: Report of the Expert Maternity Group. London: 1993.
3. Department of Health. National Service Framework for Children, Young People and Maternity Services. Standard 11: Maternity Services. London: 2004.
4. Department of Health/Partnerships for Children Families and Maternity. Maternity Matters: Choice, access and continuity of care in a safe service. London: 2007.
5. Campbell R, Macfarlane A. Place of delivery: a review. *Br J Obstet Gynaecol*. 1986 Jul;93(7):675-83.
6. Campbell R, Macfarlane A. Where to be Born? The debate and the evidence. 2nd ed. Oxford: National Perinatal Epidemiology Unit; 1994.
7. MIDIRS. Place of Birth Informed Choice Leaflet. Bristol: 2005.
8. Stewart M, McCandlish R, Henderson J, Brocklehurst P. Review of evidence about clinical, psychosocial and economic outcomes for women with straightforward pregnancies who plan to give birth in a midwife-led birth centre, and outcomes for their babies. Report of a structured review of birth centre outcomes. Revised 2005. Oxford: National Perinatal Epidemiology Unit: 2004.
9. Olsen O, Jewell MD. Home versus hospital birth. *Cochrane Database of Systematic Reviews*. 1998(3):CD000352.
10. Olsen O. Meta-analysis of the safety of home birth. *Birth*. 1997 Mar;24(1):4-13.
11. de Jonge A, van der Goes BY, Ravelli AC, Amelink-Verburg MP, Mol BW, Nijhuis JG, et al. Perinatal mortality and morbidity in a nationwide cohort of 529,688 low-risk planned home and hospital births. *BJOG*. 2009 Aug;116(9):1177-84.
12. Janssen PA, Saxell L, Page LA, Klein MC, Liston RM, Lee SK. Outcomes of planned home birth with registered midwife versus planned hospital birth with midwife or physician. *CMAJ*. 2009 Sep 15;181(6-7):377-83.
13. Lindgren HE, Radestad IJ, Christensson K, Hildingsson IM. Outcome of planned home births compared to hospital births in Sweden between 1992 and 2004. A population-based register study. *Acta Obstet Gynecol Scand*. 2008;87(7):751-9.
14. Mori R, Dougherty M, Whittle M. An estimation of intrapartum-related perinatal mortality rates for booked home births in England and Wales between 1994 and 2003. *BJOG*. 2008 Apr;115(5):554-9.
15. Wax JR, Lucas FL, Lamont M, Pinette MG, Cartin A, Blackstone J. Maternal and newborn outcomes in planned home birth vs planned hospital births: a metaanalysis. *Am J Obstet Gynecol*. 2010 Sep;203(3):243 e1-8.
16. Gyte G, Dodwell M, Newburn M, Sandall J, Macfarlane A, Bewley S. Safety of planned home births. Findings of meta-analysis cannot be relied on. *BMJ*. 2010;341:c4033.
17. Department of Health. Improvement, expansion and reform - the next 3 years: priorities and planning framework 2003-2006: Department of Health: 2002.
18. Hodnett ED, Downe S, Walsh D, Weston J. Alternative versus conventional institutional settings for birth. *Cochrane Database Syst Rev*. 2010;9:CD000012.
19. Walsh D, Downe SM. Outcomes of free-standing, midwife-led birth centers: a structured review. *Birth*. 2004 Sep;31(3):222-9.
20. National Collaborating Centre for Women's and Children's Health. Intrapartum care: care of healthy women and their babies during childbirth. London: 2007.
21. McCandlish R, Rowe R. The Birthplace in England Research Programme Report of Component Study 1: Terms and Definitions. 2007; Available from: <https://www.npeu.ox.ac.uk/birthplace/component-studies/tdc>.
22. Dorling D. The North-South Divide. University of Sheffield; 2007 [12 October 2007]; Available from: <http://sasi.group.shef.ac.uk/maps/nsdivide/index.html>.

23. Healthcare Commission. Towards better births: A review of maternity services in England. London: Commission for Healthcare Audit and Inspection: 2008.
24. Maternity Care Working Party. Making normal birth a reality: NCT, RCM & RCOG: 2007.
25. Kurinczuk J, Barralett J, Redshaw M, Brocklehurst P. Monitoring the incidence of neonatal encephalopathy - what next? Report to the Patient Safety Research Programme. Oxford: NPEU: 2005.
26. McCandlish R, Bowler U, van Asten H, Berridge G, Winter C, Sames L, et al. A randomised controlled trial of care of the perineum during second stage of normal labour. *Br J Obstet Gynaecol.* 1998 Dec;105(12):1262-72.
27. Rogers J, Wood J, McCandlish R, Ayers S, Truesdale A, Elbourne D. Active versus expectant management of third stage of labour: the Hinchingsbrooke randomised controlled trial. *Lancet.* 1998 Mar 7;351(9104):693-9.

## **Appendix 2: Outcome variables requiring clinical review and coding**

### **Neonatal encephalopathy**

Neonatal encephalopathy was defined as either a clinical diagnosis of neonatal encephalopathy or ‘signs of neonatal encephalopathy’:

- A clinical diagnosis of neonatal encephalopathy was defined as either a clinical diagnosis of neonatal encephalopathy or a clinical diagnosis of isolated seizures without a known cause other than perinatal asphyxia.
- ‘Signs of neonatal encephalopathy’ was defined as admission to a neonatal unit within 48 hours of birth for at least 48 hours with signs consistent with a diagnosis of neonatal encephalopathy:
  - receipt of parenteral or tube feeding or receipt of supplemental oxygen or respiratory support; and
  - absence of meconium aspiration, suspected or confirmed sepsis or other diagnosis consistent with feeding difficulties or need for respiratory support.

The components of the neonatal encephalopathy outcome involving isolated seizures and signs of neonatal encephalopathy were coded based on clinical review of the neonatal morbidity form data, blinded to planned place of birth.

- Diagnoses and other details recorded on the neonatal form for babies with isolated seizures but without a confirmed diagnosis of neonatal encephalopathy were reviewed by a clinician and where no cause of the seizures other than presumed asphyxia could be identified a clinical diagnosis of neonatal encephalopathy was coded as the outcome.
- Diagnoses, reasons for neonatal unit admission and other details recorded on the neonatal form for babies meeting the admission and feeding difficulties or respiratory support criteria (excluding those with a confirmed diagnosis of neonatal encephalopathy) were reviewed by a clinician and where the clinician judged that there was no alternative diagnosis consistent with feeding difficulties or need for respiratory support ‘signs of neonatal encephalopathy’ was coded as the outcome.

### **Early onset neonatal sepsis**

Because of potential misclassification of unconfirmed cases of suspected neonatal sepsis, the outcome was defined as culture confirmed early onset neonatal sepsis. The outcome variable was derived from the morbidity form data using the date of diagnosis of sepsis in combination with responses to the questions relating to a positive blood culture, evidence of infection in the cerebrospinal fluid (CSF) or a positive culture from another usually sterile site.

### **Kernicterus**

The details of purported cases of kernicterus recorded in section I of the neonatal morbidity form were reviewed by a neonatologist blinded to planned place of birth. Cases where the serum bilirubin and treatment details were inconsistent with a diagnosis of kernicterus were recoded to ‘No kernicterus’.

## **Appendix 3: Data collection forms**

### **Data collection forms included**

- Planned home birth data collection form
- Planned obstetric unit data collection form
- Obstetric unit transfer form
- Multiple maternal transfer form
- Neonatal morbidity form
- Maternal morbidity form

### **Data collection forms**

The planned home birth, FMU, and AMU data collection forms were almost identical. The planned home birth form included one extra question: D1 “Did this woman make her final decision about place of birth during labour?” The planned home birth form also had an extra option for question E3, which was about the date and time of maternal discharge: “Not applicable, delivered at home”.

The OU data collection form had four extra eligibility questions, A1 to A4, which were used to exclude women with a caesarean section before the onset of labour, a multiple pregnancy, a gestation of 36<sup>+6</sup> weeks or less, and unbooked women (ie women who did not have any antenatal care). Also, the OU form did not have a section to collect detailed information about transfers during labour or immediately after the birth.

### **Obstetric unit transfer form**

This form was used to confirm transfers where they had been recorded on an OU data collection form and to collect more detailed information about these transfers.

### **Multiple maternal transfer form**

This form was used to confirm cases where it was recorded that more than one transfer took place during labour and birth and to collect more detailed information about these transfers.

### **Morbidity forms**

These forms were used to confirm neonatal and maternal morbidities and to collect more detailed information about adverse neonatal and maternal outcomes.



Figure 4.1: Planned home birth data collection form

Barcode/Number



## Home Birth Data collection form

### Instructions

- **Please complete** this form for each woman you attend at home in labour who plans to give birth at home or who is undecided about her place of birth and who gives birth in the same clinical episode.
  - i. **Do not complete** this form for an unplanned home birth.
  - ii. **Do not complete** this form for women who have had no antenatal care.
  - iii. Please start this form during labour care.
  - iv. Please write clearly using a black pen.

- If this woman transfers to a midwifery unit or an obstetric unit, please complete as much of the form as you can and then transfer the form with the woman.
- If you start this form and the woman **does not** give birth in the same clinical episode, please tick this box  and return the form to the Local Co-ordinating Midwife.

- When the form is complete return it in the attached envelope to the Local Co-ordinating Midwife. Please ensure the return address on the back cover of this form is aligned with the window of the envelope.
- If you have any questions about the form or about this study please contact:

Birthplace Project Manager  
birthplace@npeu.ox.ac.uk  
Tel: 01865 289748  
Fax: 01865 289701

**Thank you for your contribution to Birthplace**







## Section A: Woman's identifying details

*This page will be detached from the rest of the form and kept in a secure location in your Trust by the Local Co-ordinating Midwife (LCM). This allows the LCM to deal with any inconsistencies or mistakes in the form or find missing information before sending non-identifying information (pages 2-6) to the study team in Oxford.*

Please stick woman's address label here:

OR complete the following details:

**A1. Woman's full name:** *Please print* \_\_\_\_\_

**A2. Woman's date of birth:** \_\_\_\_\_ / \_\_\_\_\_ / \_\_\_\_\_

**A3. Woman's NHS number:** \_\_\_\_\_

**A4. Woman's home address:** *Please print*

\_\_\_\_\_

\_\_\_\_\_

\_\_\_\_\_

**A5. Woman's full postcode:** \_\_\_\_\_

**A6. Section A completed by:** *Please print full name* \_\_\_\_\_

Office use only

### After birth

*Please fill in this box once the labour episode is complete*

**A7. Date of delivery:** \_\_\_\_\_ / \_\_\_\_\_ / \_\_\_\_\_

**A8. Baby's NHS number:** *(If known)* \_\_\_\_\_

## Section B: Woman's details

**B1. Woman's age at delivery: (Years)**

**B2. Woman's ethnic group: (As recorded in her maternity notes)**

Please write in one code from the list below

- |                                  |                               |
|----------------------------------|-------------------------------|
| 01 White British                 | 09 Pakistani                  |
| 02 White Irish                   | 10 Bangladeshi                |
| 03 Any other White background    | 11 Any other Asian background |
| 04 Mixed White & Black Caribbean | 12 Black Caribbean            |
| 05 Mixed White & Black African   | 13 Black African              |
| 06 Mixed White & Asian           | 14 Any other Black background |
| 07 Any other Mixed background    | 15 Chinese                    |
| 08 Indian                        | 16 Any other ethnic group     |

**B3. Woman's understanding of English language:**

- 1 Fluent
- 2 Some understanding / Able to communicate verbally
- 3 No understanding / Not able to communicate verbally

**B4. Woman's marital / partner status:**

- 1 Married / Living with a partner
- 2 Single / Unsupported by partner (*this includes single woman living with family*)

**B5. Woman's BMI in pregnancy:**   .   If not recorded tick here

**For LCM use only**

**B6. IMD score:**

.

**B7. Tick this box if this form was not started around the time of birth and was filled in retrospectively by the LCM:**

## Section C: Pregnancy history

### Previous pregnancies

**C1. Number of pregnancies of  $\geq 24$  weeks, prior to this pregnancy:** *If none, write 0*

### This pregnancy

**C2. Expected date of delivery:**   /   /

**C3. Immediately prior to the onset of labour, was this woman known to have any of the medical conditions or obstetric history items listed opposite?**

- No  
 Yes *Please write in code(s) below from tables opposite*

*Example: For a woman with previous pre-eclampsia requiring preterm birth, the condition is found in the 'Obstetric history' table under 'Previous complications' and coded '12 C'. For a woman with a condition that is not listed in the tables opposite, please enter the code for 'Other' and write in the condition in the space provided.*

|    |   |  |
|----|---|--|
| 12 | C |  |
|----|---|--|

| Code |  | If Other, please write name of condition clearly |
|------|--|--------------------------------------------------|
|      |  |                                                  |
|      |  |                                                  |
|      |  |                                                  |
|      |  |                                                  |
|      |  |                                                  |

**C4. At the start of care in labour, did this woman have any of the following conditions?** *Please tick all that apply*

- Prolonged rupture of membranes greater than 18 hours  
 If membranes are ruptured, any meconium stained liquor  
 Proteinuria of 1+ or more  
 Hypertension with either:
  - diastolic blood pressure of  $\geq 90$ mm Hg on more than one occasion 20 minutes apart or  $\geq 100$ mm Hg on one occasion
  - systolic blood pressure  $\geq 160$ mm Hg on at least one occasion Abnormal vaginal bleeding  
 Non-cephalic presentation  
 Abnormal fetal heart rate  
 Other complications *Please specify* \_\_\_\_\_  
 None of the above



## Medical conditions

| Type of condition | Code | Additional information                                                                                                                                                                                                                                                                                                                                                                         |
|-------------------|------|------------------------------------------------------------------------------------------------------------------------------------------------------------------------------------------------------------------------------------------------------------------------------------------------------------------------------------------------------------------------------------------------|
| Cardiovascular    | 01   | A: Confirmed cardiac disease<br>B: Hypertensive disorders                                                                                                                                                                                                                                                                                                                                      |
| Respiratory       | 02   | A: Asthma requiring an increase in treatment or hospital treatment<br>B: Cystic fibrosis                                                                                                                                                                                                                                                                                                       |
| Haematological    | 03   | A: Haemoglobinopathies – sickle-cell disease, beta-thalassaemia major<br>B: History of thromboembolic disorders<br>C: Immune thrombocytopenia purpura or other platelet disorder or platelet count below 100 000/cubic mm<br>D: Von Willebrand's disease<br>E: Bleeding disorder in the woman or unborn baby<br>F: Atypical antibodies which carry a risk of haemolytic disease of the newborn |
| Infective         | 04   | A: Risk factors associated with group B streptococcus whereby antibiotics in labour would be recommended<br>B: Hepatitis B/C with abnormal liver function tests<br>C: Infected with HIV<br>D: Toxoplasmosis – woman receiving treatment<br>E: Current active infection of chicken pox/rubella/genital herpes in the woman or baby<br>F: Tuberculosis under treatment                           |
| Immune            | 05   | A: Systemic lupus erythematosus<br>B: Scleroderma                                                                                                                                                                                                                                                                                                                                              |
| Endocrine         | 06   | A: Hyperthyroidism<br>B: Diabetes                                                                                                                                                                                                                                                                                                                                                              |
| Renal             | 07   | A: Abnormal renal function<br>B: Renal disease requiring supervision by a renal specialist                                                                                                                                                                                                                                                                                                     |
| Neurological      | 08   | A: Epilepsy<br>B: Myasthenia gravis<br>C: Previous cerebrovascular accident                                                                                                                                                                                                                                                                                                                    |
| Gastrointestinal  | 09   | A: Liver disease associated with current abnormal liver function tests                                                                                                                                                                                                                                                                                                                         |
| Psychiatric       | 10   | A: Psychiatric disorder requiring current inpatient care                                                                                                                                                                                                                                                                                                                                       |
| Other             | 11   | A: Please write in condition or diagnosis                                                                                                                                                                                                                                                                                                                                                      |

## Obstetric history

| Type of condition               | Code | Additional information                                                                                                                                                                                                                                                                                                                                                                                                                                                                                                                                                                                     |
|---------------------------------|------|------------------------------------------------------------------------------------------------------------------------------------------------------------------------------------------------------------------------------------------------------------------------------------------------------------------------------------------------------------------------------------------------------------------------------------------------------------------------------------------------------------------------------------------------------------------------------------------------------------|
| Previous complications          | 12   | A: Unexplained stillbirth/neonatal death or previous death related to intrapartum difficulty<br>B: Previous baby with neonatal encephalopathy<br>C: Pre-eclampsia requiring preterm birth<br>D: Placental abruption with adverse outcome<br>E: Eclampsia<br>F: Uterine rupture<br>G: Primary postpartum haemorrhage requiring additional treatment or blood transfusion<br>H: Retained placenta requiring manual removal in theatre<br>I: Caesarean section<br>J: Shoulder dystocia                                                                                                                        |
| Current pregnancy               | 13   | A: Multiple birth<br>B: Placenta praevia<br>C: Pre-eclampsia or pregnancy-induced hypertension<br>D: Preterm labour or preterm prelabour rupture of membranes<br>E: Placental abruption<br>F: Anaemia – haemoglobin less than 8.5 g/dl at onset of labour<br>G: Confirmed intrauterine death<br>H: Induction of labour<br>I: Substance misuse<br>J: Alcohol dependency requiring assessment or treatment<br>K: Onset of gestational diabetes<br>L: Malpresentation – breech or transverse lie<br>M: Body mass index at booking of greater than 35 kg/m <sup>2</sup><br>N: Recurrent antepartum haemorrhage |
| Fetal indications               | 14   | A: Small for gestational age in this pregnancy (less than fifth centile or reduced growth velocity on ultrasound)<br>B: Abnormal fetal heart rate (FHR)/Doppler studies<br>C: Ultrasound diagnosis of oligo-/polyhydramnios                                                                                                                                                                                                                                                                                                                                                                                |
| Previous gynaecological history | 15   | A: Myomectomy<br>B: Hysterotomy                                                                                                                                                                                                                                                                                                                                                                                                                                                                                                                                                                            |
| Other                           | 16   | A: Please write in condition or diagnosis                                                                                                                                                                                                                                                                                                                                                                                                                                                                                                                                                                  |

## Section D: Labour and birth

If multiple pregnancy, please complete for the first baby only

- D1. Did this woman make her final decision about place of birth during labour?**  Yes  No
- D2. Date and time midwife started labour care:**  /  /   :
- D3. Cervical dilatation at start of labour care:**  (0-10cm)  Not assessed
- D4. Was this woman transferred to a midwifery unit or an obstetric unit at any time during labour care or immediately after the birth?**  Yes  No  
If No, please go to question D5

### Maternal Transfer

If woman transferred more than once, please tick this box  and complete the questions below for care received during the first transfer only

- T1. Date and time of decision to transfer:**  /  /   :
- T2. Primary reason for transfer: Please write in one code from list**
- |                                    |                                    |
|------------------------------------|------------------------------------|
| 01 Failure to progress (1st stage) | 09 Failure to progress (2nd stage) |
| 02 Fetal distress (1st stage)      | 10 Fetal distress (2nd stage)      |
| 03 Meconium staining               | 11 Postpartum haemorrhage          |
| 04 Epidural request                | 12 Retained placenta               |
| 05 Hypertension                    | 13 Repair of perineal trauma       |
| 06 Malposition                     | 14 Other Please specify            |
| 07 Malpresentation                 |                                    |
| 08 Antepartum haemorrhage          |                                    |
- T3. Date and time of start of transfer:**  /  /   :
- T4. Mode of transfer:**  Private car  Ambulance  Other  
If Other, please specify \_\_\_\_\_
- T5. Full name of unit woman transferred to:** \_\_\_\_\_
- T6. Date and time of start of midwifery care in transfer unit:**  /  /   :
- T7. Date and time of first clinical assessment by obstetrician:**  /  /   :
- Tick if not assessed by an obstetrician
- T8. Was labour augmented with syntocinon?**  Yes  No
- T9. Did this woman have an epidural or spinal?**  Yes  No
- T10. Did this woman have a general anaesthetic?**  Yes  No

- D5. Date and time of delivery:**  /  /   :
- D6. Place of birth:**  Home  Obstetric unit  Other  
If Other, please specify \_\_\_\_\_
- D7. Mode of birth: Please tick one box only**  
If caesarean section after failed forceps/ventouse, tick caesarean section
- |                                                   |                                         |
|---------------------------------------------------|-----------------------------------------|
| <input type="checkbox"/> Spontaneous vertex birth | <input type="checkbox"/> Vaginal breech |
| <input type="checkbox"/> Ventouse                 | <input type="checkbox"/> Forceps        |
| <input type="checkbox"/> Caesarean section        |                                         |
- Primary reason for instrumental or caesarean delivery \_\_\_\_\_
- D8. At any time during labour did this woman use immersion in water for pain relief?**  Yes  No

- D9. Did this woman have active management of the 3<sup>rd</sup> stage?  Yes  No
- D10. Did this woman have an episiotomy?  Yes  No
- D11. Was there any perineal trauma involving the anal sphincter? (3<sup>rd</sup>/4<sup>th</sup> degree tear)  Yes  No
- D12. Birth outcome:  Live birth  Stillbirth
- D13. Sex of baby:  Male  Female  Unknown
- D14. Birthweight:      g
- D15. Apgar at 5 minutes:
- D16. When was the episode of labour care completed?   /   /   :    
24hr  
 See back cover for guidance

Please place this form in the woman's postnatal notes.

## Section E: After birth

To be completed by the **midwife** on or after the 5<sup>th</sup> postnatal day and before transfer to the health visitor

- E1. Within the first 48 hours after birth was this woman admitted to: Please tick all that apply  
 Do not include recovery ward for operative delivery
- High Dependency Area  ICU  Specialist unit e.g. dialysis unit
- Primary reason for admission \_\_\_\_\_
- If Specialist unit, please specify \_\_\_\_\_
- E2. Did this woman receive a blood transfusion within 48 hours of birth?  Yes  No
- E3. Date and time woman discharged home:   /   /   :    
24hr
- Not yet discharged
- Not applicable, delivered at home**
- E4. Did this woman breastfeed her baby at least once?  Yes  No
- E5. Was the baby admitted to a neonatal unit within 48 hours of birth?  Yes  No
- If Yes, to where was the baby admitted? Please tick one box only
- Special Care Baby Unit  High Dependency Unit  Neonatal Intensive Care
- Date baby was discharged from neonatal unit:   /   /
- Not yet discharged
- E6. Were any of the following identified in the baby within 48 hours after birth? Please tick all that apply
- |                                                         |                                                                                                                                                              |
|---------------------------------------------------------|--------------------------------------------------------------------------------------------------------------------------------------------------------------|
| <input type="checkbox"/> Meconium aspiration syndrome   | <input type="checkbox"/> Cephalohaematoma                                                                                                                    |
| <input type="checkbox"/> Neonatal encephalopathy        | <input type="checkbox"/> Cerebral haemorrhage                                                                                                                |
| <input type="checkbox"/> Brachial plexus injury         | <input type="checkbox"/> Kernicterus                                                                                                                         |
| <input type="checkbox"/> Fractured humerus              | <input type="checkbox"/> Seizures                                                                                                                            |
| <input type="checkbox"/> Fractured clavicle             | <input type="checkbox"/> Admission to neonatal unit within 48 hrs of birth for at least 48 hrs with evidence of feeding difficulties or respiratory distress |
| <input type="checkbox"/> Fractured skull                | <input type="checkbox"/> Other morbidity                                                                                                                     |
| <input type="checkbox"/> Neonatal sepsis                | <i>Please specify</i> _____                                                                                                                                  |
| <input type="checkbox"/> <b>No morbidity identified</b> |                                                                                                                                                              |
- E7. Was the baby known to have died at the time this form was completed?  Yes  No
- E8. Section E completed by: Please print full name \_\_\_\_\_
- /   /   :    
24hr

Please fill in the After birth section on page 1



Barcode/Number

**Thank you for completing this form.**

**Please return this form to the Local Co-ordinating Midwife in the envelope provided using the internal post.**



## **Guidance**

### **D16.**

For women who give birth at home, the episode of labour care is completed when the midwife leaves the woman's home.

For women who give birth in a freestanding midwifery unit, an alongside midwifery unit, or in hospital, the episode of labour care is completed when the woman is discharged from the delivery room or when the midwife begins the postnatal notes, whichever occurs first.

MREC reference number: 07/H0505/151

Version1

14 February 2008



Figure 4.2: Planned obstetric unit data collection form

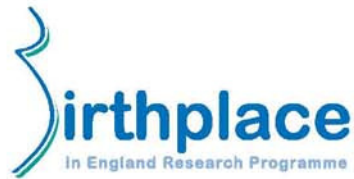

Barcode/Number

## Obstetric Unit Data collection form

### Instructions

- **Please complete** this form for each woman who plans to give birth in your obstetric unit (OU) and who is receiving care from a midwife during labour, and who you expect to give birth in this clinical episode.
  - i. Please start this form during labour care.
  - ii. Please do not use abbreviations.

- If this woman transfers to another obstetric unit, please complete as much of the form as you can and then transfer the form with the woman.
- When the form is complete return it in the attached envelope to the Local Co-ordinating Midwife. Please ensure the return address on the back cover of this form is aligned with the window of the envelope.
- If you have any questions about the form or about this study please contact:

Birthplace Project Manager  
birthplace@npeu.ox.ac.uk  
Tel: 01865 289756  
Fax: 01865 289758

Thank you for your contribution to Birthplace

[www.npeu.ox.ac.uk/birthplace](http://www.npeu.ox.ac.uk/birthplace)

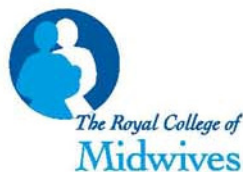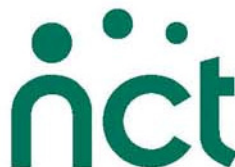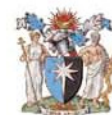

Royal College of  
Obstetricians and  
Gynaecologists

Setting standards to improve women's health

## Section A: Birthplace obstetric unit eligibility criteria

- A1.** Is this woman having a caesarean section before the onset of labour?  Yes  No
- A2.** Is this a multiple pregnancy?  Yes  No
- A3.** Is the gestation of this pregnancy 36<sup>+6</sup> weeks or less?  Yes  No
- A4.** Is this woman “unbooked”? *i.e. has had no antenatal care*  Yes  No

**If you answered ‘Yes’ to ANY of these questions:**

- Do NOT complete the remainder of this form.
- Place the form in the ‘Birthplace box’ or appropriate location for it to be returned to the Local Coordinating Midwife (LCM).

**If you answered ‘No’ to ALL of these questions:**

- Continue completing this form.
- Once you have completed Section D, at the end of the episode of labour, place the form in the woman’s postnatal notes so that section E can be completed on or after the 5th postnatal day.

## Woman’s identifying details

*This page will be detached from the rest of the form and kept in a secure location in your Trust by the Local Co-ordinating Midwife (LCM).*

Please stick woman’s address label here:

OR complete the following details:

**A5.** Woman’s full name: *Please print* \_\_\_\_\_

**A6.** Woman’s date of birth: \_\_\_\_\_ / \_\_\_\_\_ / \_\_\_\_\_

**A7.** Woman’s NHS number: \_\_\_\_\_

**A8.** Woman’s home address: *Please print*

\_\_\_\_\_

\_\_\_\_\_

\_\_\_\_\_

**A9.** Woman’s full postcode: \_\_\_\_\_

**A10.** Section A completed by: *Please print full name* \_\_\_\_\_

**After birth**

*Please fill in this box once the labour episode is complete*

**A11.** Date of delivery: \_\_\_\_\_ / \_\_\_\_\_ / \_\_\_\_\_

**A12.** Baby’s NHS number: *(If known)* \_\_\_\_\_

Office use only

## Section B: Woman's details

**B1. Woman's age at delivery: (Years)**

**B2. Woman's ethnic group: (As recorded in her maternity notes)**

Please write in one code from the list below

- |                                  |                               |
|----------------------------------|-------------------------------|
| 01 White British                 | 09 Pakistani                  |
| 02 White Irish                   | 10 Bangladeshi                |
| 03 Any other White background    | 11 Any other Asian background |
| 04 Mixed White & Black Caribbean | 12 Black Caribbean            |
| 05 Mixed White & Black African   | 13 Black African              |
| 06 Mixed White & Asian           | 14 Any other Black background |
| 07 Any other Mixed background    | 15 Chinese                    |
| 08 Indian                        | 16 Any other ethnic group     |

**B3. Woman's understanding of English language:**

- 1 Fluent
- 2 Some understanding/Able to communicate verbally
- 3 No understanding/Not able to communicate verbally

**B4. Woman's marital/partner status:**

- 1 Married/Living with a partner
- 2 Single/Unsupported by partner (this includes single woman living with family)

**B5. Woman's BMI in pregnancy:**   .   If not recorded tick here

### For LCM use only

**B6. IMD score:** ([www.npeu.ox.ac.uk/birthplace/lcm/imd](http://www.npeu.ox.ac.uk/birthplace/lcm/imd))   .

**B7. Tick this box if this form was not started around the time of birth and was filled in retrospectively by the LCM:**

## Section C: Pregnancy history

### Previous pregnancies

**C1. Number of pregnancies of  $\geq 24$  weeks, prior to this pregnancy: *If none, write 0***

### This pregnancy

**C2. Expected date of delivery:**   /   /

**C3. Immediately prior to the onset of labour, was this woman known to have any of the complications listed opposite?**

- No  
 Yes *Please write in code(s) below from tables opposite*

*Example: For a woman with previous pre-eclampsia requiring preterm birth, the condition is found in the 'Obstetric history' table under 'Previous complications' and coded '12 C'. For a woman with a condition that is not listed in the tables opposite, please enter the code for 'Other' and write in the condition in the space provided.*

|    |   |  |
|----|---|--|
| 12 | C |  |
|----|---|--|

**Code**    **If Other, please write name of condition clearly**

| Code | If Other, please write name of condition clearly |
|------|--------------------------------------------------|
|      |                                                  |
|      |                                                  |
|      |                                                  |
|      |                                                  |
|      |                                                  |

**C4. At the start of care in labour, did this woman have any of the following conditions? *Please tick all that apply***

- Prolonged rupture of membranes greater than 18 hours  
 If membranes are ruptured, any meconium stained liquor  
 Proteinuria of 1+ or more  
 Hypertension with either:  
     • diastolic blood pressure of  $\geq 90$ mm Hg on more than one occasion 20 minutes apart  
     or  $\geq 100$ mm Hg on one occasion  
     • systolic blood pressure  $\geq 160$ mm Hg on at least one occasion  
 Abnormal vaginal bleeding  
 Non-cephalic presentation  
 Abnormal fetal heart rate  
 Other complications *Please specify* \_\_\_\_\_  
 **None of the above**



## Medical conditions

| Type of condition | Code | Additional information                                                                                                                                                                                                                                                                                                                                                                         |
|-------------------|------|------------------------------------------------------------------------------------------------------------------------------------------------------------------------------------------------------------------------------------------------------------------------------------------------------------------------------------------------------------------------------------------------|
| Cardiovascular    | 01   | A: Confirmed cardiac disease<br>B: Hypertensive disorders                                                                                                                                                                                                                                                                                                                                      |
| Respiratory       | 02   | A: Asthma requiring an increase in treatment or hospital treatment<br>B: Cystic fibrosis                                                                                                                                                                                                                                                                                                       |
| Haematological    | 03   | A: Haemoglobinopathies – sickle-cell disease, beta-thalassaemia major<br>B: History of thromboembolic disorders<br>C: Immune thrombocytopenia purpura or other platelet disorder or platelet count below 100 000/cubic mm<br>D: Von Willebrand's disease<br>E: Bleeding disorder in the woman or unborn baby<br>F: Atypical antibodies which carry a risk of haemolytic disease of the newborn |
| Infective         | 04   | A: Risk factors associated with group B streptococcus whereby antibiotics in labour would be recommended<br>B: Hepatitis B/C with abnormal liver function tests<br>C: Infected with HIV<br>D: Toxoplasmosis – woman receiving treatment<br>E: Current active infection of chicken pox/rubella/genital herpes in the woman or baby<br>F: Tuberculosis under treatment                           |
| Immune            | 05   | A: Systemic lupus erythematosus<br>B: Scleroderma                                                                                                                                                                                                                                                                                                                                              |
| Endocrine         | 06   | A: Hyperthyroidism<br>B: Diabetes                                                                                                                                                                                                                                                                                                                                                              |
| Renal             | 07   | A: Abnormal renal function<br>B: Renal disease requiring supervision by a renal specialist                                                                                                                                                                                                                                                                                                     |
| Neurological      | 08   | A: Epilepsy<br>B: Myasthenia gravis<br>C: Previous cerebrovascular accident                                                                                                                                                                                                                                                                                                                    |
| Gastrointestinal  | 09   | A: Liver disease associated with current abnormal liver function tests                                                                                                                                                                                                                                                                                                                         |
| Psychiatric       | 10   | A: Psychiatric disorder requiring current inpatient care                                                                                                                                                                                                                                                                                                                                       |
| Other             | 11   | A: Please write in condition or diagnosis                                                                                                                                                                                                                                                                                                                                                      |

## Obstetric history

| Type of condition               | Code | Additional information                                                                                                                                                                                                                                                                                                                                                                                                                                                                                                                                                                                     |
|---------------------------------|------|------------------------------------------------------------------------------------------------------------------------------------------------------------------------------------------------------------------------------------------------------------------------------------------------------------------------------------------------------------------------------------------------------------------------------------------------------------------------------------------------------------------------------------------------------------------------------------------------------------|
| Previous complications          | 12   | A: Unexplained stillbirth/neonatal death or previous death related to intrapartum difficulty<br>B: Previous baby with neonatal encephalopathy<br>C: Pre-eclampsia requiring preterm birth<br>D: Placental abruption with adverse outcome<br>E: Eclampsia<br>F: Uterine rupture<br>G: Primary postpartum haemorrhage requiring additional treatment or blood transfusion<br>H: Retained placenta requiring manual removal in theatre<br>I: Caesarean section<br>J: Shoulder dystocia                                                                                                                        |
| Current pregnancy               | 13   | A: Multiple birth<br>B: Placenta praevia<br>C: Pre-eclampsia or pregnancy-induced hypertension<br>D: Preterm labour or preterm prelabour rupture of membranes<br>E: Placental abruption<br>F: Anaemia – haemoglobin less than 8.5 g/dl at onset of labour<br>G: Confirmed intrauterine death<br>H: Induction of labour<br>I: Substance misuse<br>J: Alcohol dependency requiring assessment or treatment<br>K: Onset of gestational diabetes<br>L: Malpresentation – breech or transverse lie<br>M: Body mass index at booking of greater than 35 kg/m <sup>2</sup><br>N: Recurrent antepartum haemorrhage |
| Fetal indications               | 14   | A: Small for gestational age in this pregnancy (less than fifth centile or reduced growth velocity on ultrasound)<br>B: Abnormal fetal heart rate (FHR)/Doppler studies<br>C: Ultrasound diagnosis of oligo-/polyhydramnios                                                                                                                                                                                                                                                                                                                                                                                |
| Previous gynaecological history | 15   | A: Myomectomy<br>B: Hysterotomy                                                                                                                                                                                                                                                                                                                                                                                                                                                                                                                                                                            |
| Other                           | 16   | A: Please write in condition or diagnosis                                                                                                                                                                                                                                                                                                                                                                                                                                                                                                                                                                  |

## Section D: Labour and birth

- D1. Date and time midwife started labour care:  /  /   :  <sup>24hr</sup>
- D2. Cervical dilatation at start of labour care:   (0-10cm)  Not assessed
- D3. Was this woman transferred to another obstetric unit at any time during labour care or immediately after birth?  Yes  No
- D4. Was labour augmented with syntocinon?  Yes  No
- D5. At any time during labour did this woman use immersion in water for pain relief?  Yes  No
- D6. Did this woman have an epidural or spinal?  Yes  No
- D7. Did this woman have a general anaesthetic?  Yes  No
- D8. Date and time of delivery:  /  /   :  <sup>24hr</sup>
- D9. Place of birth:  Obstetric unit  Other  
If Other, please specify \_\_\_\_\_
- D10. Mode of birth: Please tick one box only  
If caesarean section after failed forceps/ventouse, tick caesarean section  
 Spontaneous vertex birth  Vaginal breech  
 Ventouse  Forceps  Caesarean section  
Primary reason for instrumental or caesarean delivery \_\_\_\_\_
- D11. Did this woman have active management of the 3<sup>rd</sup> stage?  Yes  No
- D12. Did this woman have an episiotomy?  Yes  No
- D13. Was there any perineal trauma involving the anal sphincter? (3<sup>rd</sup>/4<sup>th</sup> degree tear)  Yes  No
- D14. Birth outcome:  Live birth  Stillbirth
- D15. Sex of baby:  Male  Female  Unknown
- D16. Birthweight:     g
- D17. Apgar at 5 minutes:
- D18. When was the episode of labour care completed?  /  /   :  <sup>24hr</sup>  
See back cover for guidance

Please place this form in the woman's postnatal notes.

## Section E: After birth

To be completed by the **midwife** on or after the 5<sup>th</sup> postnatal day and before transfer to the health visitor

**E1. Within the first 48 hours after birth was this woman admitted to:** Please tick all that apply  
Do not include recovery ward for operative delivery

High Dependency Area  ICU  Specialist unit e.g. dialysis unit

Primary reason for admission \_\_\_\_\_

If Specialist unit, please specify unit type \_\_\_\_\_

**E2. Did this woman receive a blood transfusion within 48 hours of birth?**  Yes  No

**E3. Date and time woman discharged home:** / /  : :  24hr

Not yet discharged

**E4. Did this woman breastfeed her baby at least once?**  Yes  No

**E5. Was the baby admitted to a neonatal unit within 48 hours of birth?**  Yes  No

If Yes, to where was the baby admitted? Please tick one box only

Special Care Baby Unit  High Dependency Unit  Neonatal Intensive Care

Date baby was discharged from neonatal unit: / /

Not yet discharged

**E6. Were any of the following identified in the baby within 48 hours after birth?** Please tick all that apply

Meconium aspiration syndrome

Neonatal encephalopathy

Brachial plexus injury

Fractured humerus

Fractured clavicle

Fractured skull

Neonatal sepsis

**No morbidity identified**

Cephalohaematoma

Cerebral haemorrhage

Kernicterus

Seizures

Admission to neonatal unit within 48 hrs of birth for at least 48 hrs with evidence of feeding difficulties or respiratory distress

Other morbidity

Please specify \_\_\_\_\_

**E7. Was the baby known to have died at the time this form was completed?**  Yes  No

**E8. Section E completed by:** Please print full name \_\_\_\_\_

**E9. Date and time Section E completed:** / /  : :  24hr

Please fill in the After birth section on page 1

Barcode/Number

**Thank you for completing this form.**

**Please return this form to the Local Co-ordinating Midwife in the envelope provided using the internal post.**

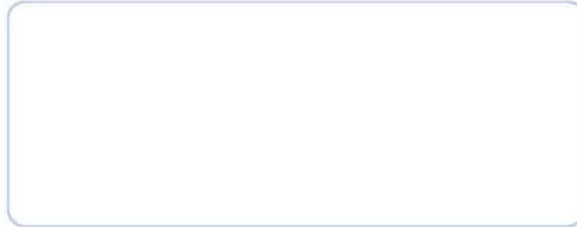

## **Guidance**

### **D18.**

The episode of labour care is completed when the woman is discharged from the delivery room or when the midwife begins the postnatal notes, whichever occurs first.

MREC reference number: 07/H0505/151

Version 2

1 October 2008



Figure 3.3: Obstetric unit transfer form

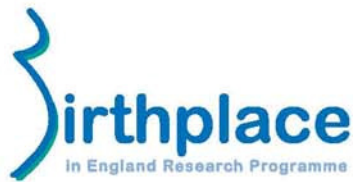

LCM no.: \_\_\_\_\_

Woman's DCF no.: \_\_\_\_\_

## Obstetric Unit Transfer Form

- This form must be completed for each woman who is transferred from one obstetric unit to another between the time the midwife begins the labour notes to the end of labour care, before postnatal care begins. (see back page for guidance).

**Maternal Transfer**

**T1. Date and time of decision to make this transfer:**      /   /    :   24hr

**T2. Primary reason for this transfer: Please write in one code from list**   

|                                    |                                    |
|------------------------------------|------------------------------------|
| 01 Failure to progress (1st stage) | 09 Failure to progress (2nd stage) |
| 02 Fetal distress (1st stage)      | 10 Fetal distress (2nd stage)      |
| 03 Meconium staining               | 11 Postpartum haemorrhage          |
| 04 Epidural request                | 12 Retained placenta               |
| 05 Hypertension                    | 13 Repair of perineal trauma       |
| 06 Malposition                     | 14 Other <i>Please specify</i>     |
| 07 Malpresentation                 | _____                              |
| 08 Antepartum haemorrhage          | _____                              |

**T3 Date and time of start of this transfer:**      /   /    :   24hr

**T4. Mode of transfer:**     Private car     Ambulance     Other  
 If Other, please specify \_\_\_\_\_

**T5. Full name of unit woman transferred from:** \_\_\_\_\_

**T6. Full name of unit woman transferred to:** \_\_\_\_\_

**T7. Date and time of start of midwifery care in transfer unit:**      /   /    :   24hr

**T8. Date and time of first clinical assessment by obstetrician:**      /   /    :   24hr  
 Tick if not assessed by an obstetrician

Please write any comments in the box below:

Thank you for your contribution to Birthplace

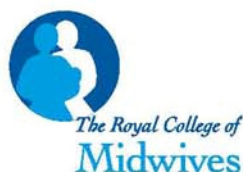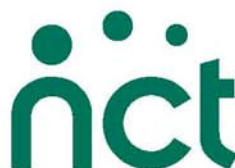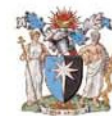

Royal College of  
Obstetricians and  
Gynaecologists

Setting standards to improve women's health

**Thank you for completing this form.**  
**Please return this form to the Birthplace co-ordinating office.**

FREEPOST RRKH-XXAB-JJLK  
Birthplace in England Research Programme  
NPEU  
University of Oxford  
Old Road Campus  
Headington  
Oxford, OX3 7LF

## **Guidance**

### **Definition of End of Labour Care**

The episode of labour care is completed when the woman is discharged from the delivery room or when the midwife begins the postnatal notes, whichever occurs first.

MREC reference number: 07/H0505/151  
Version 1  
October 2008

Figure 3.4: Multiple maternal transfer form

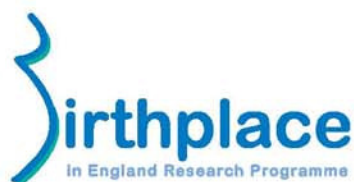

LCM no.: \_\_\_\_\_

Woman's DCF no.: \_\_\_\_\_

## Multiple Maternal Transfer Form

This form relates to maternal transfers occurring between the time that the midwife started labour care through to the end of labour care.

- **INCLUDE** transfers between units during labour (e.g. from home to a freestanding midwifery unit (MU) or from an alongside MU to an obstetric unit).
- Do **NOT INCLUDE** transfers within a unit (e.g. from the labour ward/delivery room to the operating theatre).
- Do **NOT INCLUDE** transfers occurring at or after the end of labour care (e.g. to the postnatal ward or ICU).

### Section A: First maternal transfer

From:  Home  Freestanding MU  Alongside MU  Obstetric Unit

1. Name of unit transferred to: \_\_\_\_\_

2. Type of unit:  Freestanding MU  Alongside MU  Obstetric Unit

3. Was the woman transferred more than once (before the end of labour care)?  
 Yes  No

*If No, please go to section D*

### Section B: Second maternal transfer

4. Date and time of decision to make this transfer: / /  :    
24hr

5. Primary reason for this transfer: *Please write in one code from list*

- |                                    |                                    |                                       |
|------------------------------------|------------------------------------|---------------------------------------|
| 01 Failure to progress (1st stage) | 07 Malpresentation                 | 13 Repair of perineal trauma          |
| 02 Fetal distress (1st stage)      | 08 Antepartum haemorrhage          | 14 Other <i>Please specify:</i> _____ |
| 03 Meconium staining               | 09 Failure to progress (2nd stage) |                                       |
| 04 Epidural request                | 10 Fetal distress (2nd stage)      |                                       |
| 05 Hypertension                    | 11 Postpartum haemorrhage          |                                       |
| 06 Malposition                     | 12 Retained placenta               |                                       |

6. Date and time of start of this transfer: / /  :    
24hr

7. Mode of transfer:  Ambulance  Other

*If Other, please give details* \_\_\_\_\_

8. Name of unit transferred to: \_\_\_\_\_

9. Type of unit:  Freestanding MU  Alongside MU  Obstetric Unit

10. Date and time of start of care in this unit: / /  :    
24hr

11. Was the woman transferred a third time?  Yes  No

*If No, please go to section D*

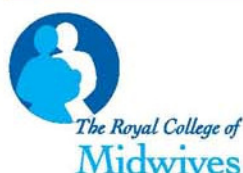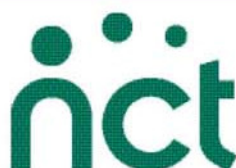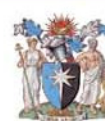

Royal College of  
Obstetricians and  
Gynaecologists

Setting standards to improve women's health



## Section C: Third maternal transfer

12. Date and time of decision to make this transfer:  /  /   :    
24hr
13. Primary reason for this transfer: Please write in one code from list
- |                                    |                                    |                                |
|------------------------------------|------------------------------------|--------------------------------|
| 01 Failure to progress (1st stage) | 07 Malpresentation                 | 13 Repair of perineal trauma   |
| 02 Fetal distress (1st stage)      | 08 Antepartum haemorrhage          | 14 Other Please specify: _____ |
| 03 Meconium staining               | 09 Failure to progress (2nd stage) |                                |
| 04 Epidural request                | 10 Fetal distress (2nd stage)      |                                |
| 05 Hypertension                    | 11 Postpartum haemorrhage          |                                |
| 06 Malposition                     | 12 Retained placenta               |                                |
14. Date and time of start of this transfer:  /  /   :    
24hr
15. Mode of transfer:  Ambulance  Other  
If Other, please give details \_\_\_\_\_
16. Name of unit transferred to: \_\_\_\_\_
17. Type of unit:  Freestanding MU  Alongside MU  Obstetric Unit
18. Date and time of start of care in this unit:  /  /   :    
24hr

## Section D: Intrapartum care

19. Date and time of first clinical assessment by an obstetrician:  /  /   :    
24hr
- Tick if not assessed by an obstetrician:
20. Was labour augmented with syntocinon?  Yes  No
21. Did the woman have an epidural or spinal?  Yes  No
22. Did the woman have a general anaesthetic?  Yes  No

## Section E: Other details

23. Please record any other information that you think may be relevant

Completed by: \_\_\_\_\_

**Thank you for completing this form.  
Please return this form to the Birthplace Co-ordinating Office.**

FREEPOST RRRH-XXAB-JJLK  
Birthplace in England Research Programme  
NPEU, University of Oxford  
Old Road Campus  
Oxford, OX3 7LF

MREC reference number: 07/H0505/151  
Version 2, March 2010

Figure 3.5: Neonatal morbidity form

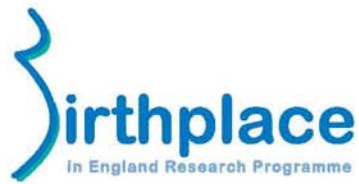

Affix FRONT PAGE sticker here

## Neonatal morbidity/mortality follow-up

This form relates to a baby who was part of the Birthplace cohort study. This study is designed to compare outcomes of births planned at home, in different types of midwifery units and in hospital obstetric units ([www.npeu.ox.ac.uk/birthplace](http://www.npeu.ox.ac.uk/birthplace)).

Our study records show that this baby was admitted to a neonatal unit and/or experienced significant morbidity. We now need further information about the baby whose details are given above. *Further guidance on completing this form is given on the inside of the front page.*

### Instructions for the Birthplace Local Coordinating Midwife:

Please complete the relevant stickers and attach to the front and back of this form.

- tick here if the baby was admitted to a neonatal or paediatric unit. This form should be completed by, or with the help of, a member of the clinical team on the admitting unit, with the agreement of the clinical director for neonatal services.
- tick here if the baby was *not admitted* to a neonatal or paediatric unit – please complete this form yourself.

After completion, please:

- Tick here if no relevant morbidity/mortality has been recorded (see page 6)
  - Remove this front page and store securely with the Birthplace documents.
  - Return the rest of the form to the Birthplace office using the Freepost envelopes provided.

Thank you

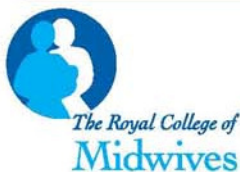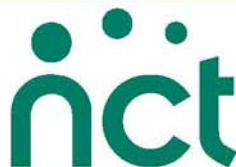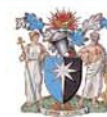

Royal College of  
Obstetricians and  
Gynaecologists

Setting standards to improve women's health

### Instructions to the person completing this form

Please complete this form and return to the Birthplace Local Coordinating midwife (LCM). See back page for return address.

Please enter your name and contact details here in case the LCM has any queries.

Name: \_\_\_\_\_ Phone/email: \_\_\_\_\_

The LCM will check the completed form and remove the front page and all identifying details before returning to the Birthplace office. The front page will be kept in a secure location by the LCM in the Trust where this baby was born.

### Thank you for your help.

If you have any questions about the form or about this study please contact:

- the Birthplace Local Coordinating midwife (LCM) whose address is given on the back page of this form; or
- the Birthplace Project Manager  
Tel: 01865 289748  
Fax: 01865 289758  
Email: [birthplace@npeu.ox.ac.uk](mailto:birthplace@npeu.ox.ac.uk)

MREC reference number: 07/H0505/151

### Definitions: Levels of neonatal care

*Intensive care:* for babies with the most complex problems, receiving any respiratory support via a tracheal tube and in the first 24 hours after its withdrawal; receiving NCPAP for any part of the day and less than five days old; below 1000g current weight and receiving NCPAP for any part of the day and for 24 hours after withdrawal; less than 29 weeks gestational age and less than 48 hours old; requiring major emergency surgery, for the pre-operative period and post-operatively for 24 hours; requiring full exchange transfusion, peritoneal dialysis, infusion of an inotrope, pulmonary vasodilator or prostaglandin and for 24 hours afterwards; any other very unstable baby considered by the nurse-in-charge to need 1:1 nursing; a baby on the day of death.

*High dependency care:* babies receiving NCPAP for any part of the day and not fulfilling any of the criteria for intensive care; below 1000g current weight and not fulfilling any of the criteria for intensive care; receiving parenteral nutrition; having convulsions; receiving oxygen therapy and below 1500g current weight; requiring treatment for neonatal abstinence syndrome; requiring specified procedures that do not fulfil any criteria for intensive care: care of an intra-arterial catheter or chest drain, partial exchange transfusion, tracheostomy care until supervised by a parent; requiring frequent stimulation for severe apnoea.

*Special care:* provided for all other babies who could not reasonably be expected to be looked after at home by their mother.

*Normal care:* provided for babies who themselves have no medical indication to be in hospital.

## Section A: Neonatal or paediatric unit admission

1. Was this baby admitted to a neonatal or paediatric unit for intensive care, high dependency care, special care or transitional care within 48 hours of birth? Yes  No   
*If No, please go to section B.*

2. Date of admission:  /  /

3. Type of unit

Neonatal unit

Other

*If Other, please specify unit type: \_\_\_\_\_*

4. How many days care did the baby receive at each level of care?  
*Include part of any day as 1 day*

Intensive care    days

High dependency care    days

Special care    days

Normal care (including on postnatal ward)    days

Total days:    days

*See definitions of levels of care inside front page of this booklet.*

5. Did this baby have any respiratory support (ventilator or continuous positive airway pressure, CPAP) during their admission? Yes  No   
*If Yes, for how many days? Include part of any day as 1 day*

Total number of days receiving respiratory support    days

Total number of days receiving supplemental oxygen    days

6. Has the baby been discharged home? Yes  No   
*If Yes, please give date:*  /  /

7. What were the main reasons for admission?

\_\_\_\_\_

\_\_\_\_\_

\_\_\_\_\_

## Section B: Meconium aspiration

1. Was this baby diagnosed with meconium aspiration syndrome? Yes  No   
*If No, please go to section C.*

2. Date of diagnosis:  /  /



3. Did this baby receive ECMO during admission? Yes  No

If Yes, please give total number of days baby received ECMO:   days

4. Were any of the following diagnosed at any time during the baby's stay in the unit, in addition to the diagnosis of meconium aspiration syndrome? Please tick all that apply

- Pneumonia
- Pulmonary air leak
- Pulmonary haemorrhage
- Pulmonary hypertension

## Section C: Encephalopathy

1. Was this baby diagnosed with neonatal encephalopathy? Yes  No

If No, please go to section D.

2. Date of diagnosis:   /   /

3. What was the most severe grade of encephalopathy recorded?

- Mild
- Moderate
- Severe

4. Was a specific cause of the encephalopathy identified? Yes  No

If Yes, please give details of any causes identified, in addition to presumed perinatal asphyxia.

---

---

5. Did the baby have seizures requiring treatment? Yes  No

6. Was the baby treated with hypothermia (cooling)? Yes  No

## Section D: Seizures

1. Was this baby diagnosed with isolated seizures? Yes  No

If No, please go to section E.

2. Date of diagnosis:   /   /

3. Was a specific cause of the isolated seizures identified? Yes  No

If Yes, please give details of any causes identified, in addition to presumed perinatal asphyxia.

---

---

4. Was the baby prescribed medication to control seizures at any time? Yes  No



## Section E: Sepsis

1. Was this baby diagnosed with neonatal sepsis (proven or suspected)? Yes  No   
*If No, please go to section F.*

2. Date of diagnosis: / /

3. Clinical risk factors for infection:

Did the mother have a diagnosis of clinical chorioamnionitis? Yes  No

What was the duration of membrane rupture prior to delivery?  days  hours  
OR  Not Known

Was the mother known to be a carrier of GBS prior to birth? Yes  No

4. Up to and including the 5th postnatal day, did the baby have?

A positive blood culture Yes  No   
*If Yes, please specify organism:* \_\_\_\_\_

Evidence of infection in CSF Yes  No   
*If Yes, please specify white cell count:* \_\_\_\_\_  
*Please specify organism:* \_\_\_\_\_

A positive culture from another site (not blood or CSF)? Yes  No   
*If Yes, please specify usually sterile site(s) and organism(s):* \_\_\_\_\_

Bowel perforation or definite necrotising enterocolitis? Yes  No

Chest X-ray changes consistent with pneumonia? Yes  No

## Section F: Cephalhaematoma

1. Was this baby diagnosed with cephalhaematoma or subaponeurotic bleeding?

Cephalhaematoma Yes  No

Subaponeurotic bleeding Yes  No

*If No to both, please go to section G.*

2. Date of diagnosis: / /

## Section G: Cerebral haemorrhage

1. Was this baby diagnosed with an intracranial haemorrhage? Yes  No   
*If No, please go to section H.*

2. Date of diagnosis: / /

3. What kind of intracranial haemorrhage was this?

- Subdural haemorrhage
- Subarachnoid haemorrhage
- Intracerebral haemorrhage
- Intraventricular haemorrhage
- Other

If Other, please give details: \_\_\_\_\_

## Section H: Injuries

1. Was this baby diagnosed with any of the injuries listed below? Yes  No   
 If No, please go to section I.

Date of diagnosis and cause. Please tick all that apply.

| Injury                                               | Data of diagnosis | Cause of injury |
|------------------------------------------------------|-------------------|-----------------|
| <input type="checkbox"/> Brachial plexus injury      | DD / MM / YY      |                 |
| <input type="checkbox"/> Fractured humerus           | DD / MM / YY      |                 |
| <input type="checkbox"/> Fractured clavicle          | DD / MM / YY      |                 |
| <input type="checkbox"/> Fractured skull             | DD / MM / YY      |                 |
| <input type="checkbox"/> Other injury (give details) | DD / MM / YY      |                 |

## Section I: Kernicterus

1. Was this baby diagnosed with kernicterus? Yes  No   
 If No, please go to section J.

2. Date of diagnosis: DD / MM / YY
3. What was the maximum SBR recorded for this baby?      μmol/l
4. Did the baby require an exchange transfusion? Yes  No
5. How many days of phototherapy did the baby receive?   days  
*Include part of any day as 1 day*

## Section J: Feeding difficulties

1. Was this baby diagnosed with feeding difficulties which required admission to a neonatal or paediatric unit for 48 hours or more? Yes  No   
 If No, please go to section K.

2. Date of diagnosis: DD / MM / YY

3. Did this baby require parenteral feeding? Yes  No   
 If Yes, please give the total number of days:    days
4. Did this baby require tube (orogastric or nasogastric) feeding? Yes  No   
 If Yes, please give the total number of days:    days
5. How was the baby being fed at time of discharge (or current method of feeding if not yet discharged)?
- Please tick all that apply.
- Intravenously
- Naso-gastric
- Oro-gastric route
- Oral sucking feeding

## Section K: Neonatal death

1. Was the baby known to have died at the time this form was completed? Yes  No   
 If No, please go to section L.
2. Date and time of baby's death:   /   /   :   <sup>24h</sup>
3. Was this baby registered as a neonatal death? Yes  No
4. If this was a neonatal death, where did the baby die?
- Obstetric unit postnatal room
- Alongside midwifery unit labour room
- Alongside midwifery unit postnatal room
- Freestanding midwifery unit labour room
- Home
- Neonatal unit
- Paediatric unit
- Other
- If Other, please give details: \_\_\_\_\_
5. Has a cause of death been identified? Yes  No   
 If Yes, please provide details:  
 \_\_\_\_\_  
 \_\_\_\_\_  
 \_\_\_\_\_
6. Has a postmortem been performed? Yes  No

## Section L: Other details

**For all babies:** please check all sections and add any additional information that you think might be relevant regarding this baby's condition:

---

---

---

---

## Confirmation of significant neonatal morbidity or mortality

1. **Have at least one of the outcomes listed below been identified for this baby?**

Yes  No

- Neonatal or paediatric unit admission (Section A)
- Meconium aspiration (Section B)
- Encephalopathy (Section C)
- Seizures (Section D)
- Sepsis (Section E)
- Cephalhaematoma (Section F)
- Cerebral haemorrhage (Section G)
- Injuries (Section H)
- Kernicterus (Section I)
- Feeding difficulties (Section J)
- Neonatal death (Section K)

If **No**, were any of the above conditions suspected but not confirmed on investigation?

Yes  No

If **Yes**, please give details

---

---

---

If **No**, please tick the **blue** box on the front page and give any relevant details below

---

---

---

Job title of person completing this form \_\_\_\_\_

Date form completed

|    |    |    |
|----|----|----|
| DD | MM | YY |
|----|----|----|

**Please return this form to the Birthplace Local Coordinating Midwife  
(see back cover for the address details)**

Affix BACK PAGE sticker here

### Return instructions for the person completing this form

Please return this form to the Birthplace Local Coordinating Midwife at the above address. *Do NOT return to the Birthplace office.*

**Thank you very much for completing this form.**

If you have any questions, please contact the Birthplace office:

Birthplace Project Manager  
Birthplace in England Research Programme  
National Perinatal Epidemiology Unit  
University of Oxford  
Old Road Campus  
Oxford  
OX3 7LF

Tel: 01865 289748  
Fax: 01865 289758  
Email: [birthplace@npeu.ox.ac.uk](mailto:birthplace@npeu.ox.ac.uk)

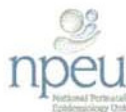

MREC ref: 07/H0505/151  
V1 01/2010

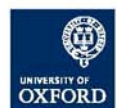

Figure 3.6: Maternal morbidity form

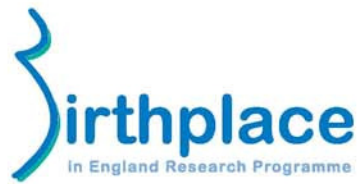

Affix FRONT PAGE sticker here

## Maternal morbidity/mortality follow-up

The Birthplace data collection form for this woman indicates that significant maternal morbidity or mortality may have occurred, or that the baby was stillborn.

**Please complete this form to provide additional details about these events.**

If you are not sure how to answer any of the questions, please contact the Birthplace office (tel: 01865 289748; email: [birthplace@npeu.ox.ac.uk](mailto:birthplace@npeu.ox.ac.uk); fax: 01865 289758).

### Instructions for completing this form:

Please complete the relevant stickers and attach to the front and back of this form.

After completion, please:

- Tick here if no relevant morbidity/mortality has been recorded (see page 4)
- Before returning, remove this front page and store securely with the Birthplace documents.
- Return the rest of the form to the Birthplace office using the Freepost envelopes provided.

Thank you

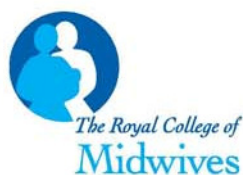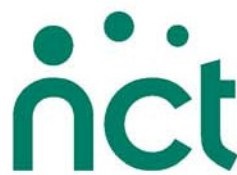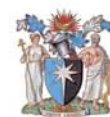

Royal College of  
Obstetricians and  
Gynaecologists

Setting standards to improve women's health



## Section A: Blood transfusion

1. Did this woman receive a blood transfusion within 48 hours of the birth? Yes  No

If No, please go to section B.

2. When was the first blood transfusion given?

Was this? Please tick one box

- Intrapartum   
End of third stage – 23 hours after birth   
24 – 48 hours after birth

3. How many units of whole blood or packed cells did this woman receive?

4. Was a cell saver used? Yes  No

If Yes, please give the volume of patient's blood transfused:     ml

5. What was the lowest postnatal haemoglobin recorded for this woman?   .   g/dl

6. What was the primary reason for the blood transfusion? Please tick one only

- Uterine atony   
Genital tract trauma   
Morbidly adherent placenta   
Infection   
Anaemia   
Retained products   
Other

If Other, please give details \_\_\_\_\_

## Section B: High dependency, intensive or specialist care

1. Within the first 48 hours after the birth was this woman admitted to a higher level of care? Yes  No

If No, please go to section C.

2. What type of higher level care did this woman receive? Please tick all that apply

- High dependency unit or area   
Intensive care unit   
Specialist unit e.g. dialysis unit

Type of specialist unit \_\_\_\_\_

If you have ticked any of the above boxes, please continue completing this section.

If Not, please go to next section.

3. Please give details of length of stay and reasons for admission to higher level care:

| Type of unit | Date of admission | Date of discharge | Main reason for admission | Treatment(s) received |
|--------------|-------------------|-------------------|---------------------------|-----------------------|
|              | DD / MM / YY      | DD / MM / YY      |                           |                       |
|              | DD / MM / YY      | DD / MM / YY      |                           |                       |
|              | DD / MM / YY      | DD / MM / YY      |                           |                       |
|              | DD / MM / YY      | DD / MM / YY      |                           |                       |
|              | DD / MM / YY      | DD / MM / YY      |                           |                       |

### Section C: Maternal mortality

1. Was this woman registered as a maternal death (within 42 days of giving birth)? Yes  No

If No, please go to section D.

2. Date and time of maternal death DD / MM / YY HH : MM

3. Where did this woman die?

- Obstetric unit
- Alongside midwifery unit
- Freestanding midwifery unit
- Home
- High dependency unit/area
- Intensive care unit
- Other hospital ward or department

If Other, please give details \_\_\_\_\_

4. Has a cause of death been identified? Yes  No

If Yes, please provide details:

\_\_\_\_\_

\_\_\_\_\_

\_\_\_\_\_

5. Has a postmortem been performed? Yes  No



## Section D: Stillbirth

1. Was this baby registered as a stillbirth? Yes  No

If No, please go to section E.

2. Was a fetal heartbeat heard at labour onset? Yes  No

3. If this was an intrapartum stillbirth, was stillbirth diagnosed in?

First stage of labour

Second stage of labour

Other

If Other, please give details: \_\_\_\_\_

4. Has a cause of death been identified? Yes  No

If Yes, please provide details:

\_\_\_\_\_

\_\_\_\_\_

\_\_\_\_\_

5. Has a postmortem been performed? Yes  No

## Section E: Other details

Please check the form and add any additional information that you think might be relevant about this delivery, the mother or the fetus/baby.

\_\_\_\_\_

\_\_\_\_\_

\_\_\_\_\_

\_\_\_\_\_

**Form continues on next page. P.T.O.**

## Confirmation of significant maternal morbidity or mortality

1. Have at least one of the outcomes listed below been identified for this woman or baby?

Yes  No

- Blood transfusion (Section A)
- Maternal admission or mortality (Sections B & C)
- Stillbirth (Section D)

If No, were any of the above conditions suspected but not confirmed on investigation?

Yes  No

If Yes, please give details

---

---

---

If No, please tick the blue box on the front page and give any relevant details below

---

---

---

Job title of person completing this form \_\_\_\_\_

Date form completed

|    |    |    |
|----|----|----|
| DD | MM | YY |
|----|----|----|

Affix BACK PAGE sticker here

**Thank you very much for completing this form.**

If you have any questions, please contact the Birthplace office:

Birthplace Project Manager  
FREEPOST RRKH-XXAB-JJLK  
Birthplace in England Research Programme  
National Perinatal Epidemiology Unit  
University of Oxford  
Old Road Campus  
Oxford  
OX3 7LF

Tel: 01865 289748  
Fax: 01865 289758  
Email: [birthplace@npeu.ox.ac.uk](mailto:birthplace@npeu.ox.ac.uk)

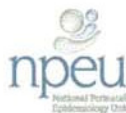

MREC ref: 07/H0505/151  
V1 01/2010

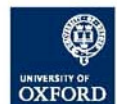

## Appendix 4: Categorisation of potential confounders

The potential confounders used in the adjusted analyses to take into account differences in the maternal characteristics between the groups were maternal age, ethnicity, understanding of English, marital or partner status, body mass index (BMI) in pregnancy, Index of Multiple Deprivation score, parity and gestation at delivery. Quantitative variables were treated as unordered categorical variables because it was not assumed that there was a linear relationship between any of the potential confounders and the incidence of the primary outcome. The categories used were either recommended categories or categories used commonly in other research in the field.<sup>28</sup> For analyses of the primary outcome, Indian and Bangladeshi women were grouped together because of the small number of Bangladeshi women in the sample and because outcomes are similar in these groups.<sup>29</sup>

**Table 4.1: Categorisation of potential confounders**

| Covariate                                       | Response categories                                 |
|-------------------------------------------------|-----------------------------------------------------|
| Maternal age                                    | 1 Less than 20 years                                |
|                                                 | 2 20 to 24 years                                    |
|                                                 | 3 25 to 29 years                                    |
|                                                 | 4 30 to 34 years                                    |
|                                                 | 5 35 to 39 years                                    |
|                                                 | 6 40+ years                                         |
| Ethnic group                                    | 1 White                                             |
|                                                 | 2 Indian or Bangladeshi*                            |
|                                                 | 3 Pakistani                                         |
|                                                 | 4 Black Caribbean                                   |
|                                                 | 5 Black African                                     |
|                                                 | 6 Mixed                                             |
|                                                 | 7 Other                                             |
| Understanding of English                        | 1 Fluent                                            |
|                                                 | 2 Some understanding/able to communicate verbally   |
|                                                 | 3 No understanding/not able to communicate verbally |
| Marital or partner status                       | 1 Married/living with partner                       |
|                                                 | 2 Single/unsupported by partner                     |
| BMI in pregnancy (Kg/m <sup>2</sup> )           | 0 Not recorded                                      |
|                                                 | 1 Less than 18.5                                    |
|                                                 | 2 18.5 to 24.9                                      |
|                                                 | 3 25.0 to 29.9                                      |
|                                                 | 4 30.0 to 35.0                                      |
| 5 >35.0 ('higher risk' group only) <sup>†</sup> |                                                     |
| Index of Multiple Deprivation score             | 1 1st quintile (least deprived)                     |
|                                                 | 2 2nd quintile                                      |
|                                                 | 3 3rd quintile                                      |
|                                                 | 4 4th quintile                                      |
|                                                 | 5 5th quintile (most deprived)                      |
| Parity (Previous pregnancies $\geq$ 24 weeks)   | 1 Nulliparous                                       |
|                                                 | 2 1 previous                                        |
|                                                 | 3 2 previous                                        |
|                                                 | 4 3 or more previous                                |
| Gestation at delivery                           | 1 37 weeks                                          |
|                                                 | 2 38 weeks                                          |
|                                                 | 3 39 weeks                                          |
|                                                 | 4 40 weeks                                          |
|                                                 | 5 41 weeks                                          |
|                                                 | 6 42 to 44 weeks                                    |

\* For analyses of the primary outcome, Indian and Bangladeshi women were grouped together because of the small number of Bangladeshi women in the sample and similar outcomes in these groups.<sup>29</sup>

<sup>†</sup> The cut-off of a BMI greater than or equal to 35.0 kg/m<sup>2</sup> as putting the woman or baby at 'higher risk' was taken from the NICE Obesity guideline.<sup>28</sup>

## Appendix 5: Sensitivity analysis, trusts/units with a response rate of at least 85%

To gauge whether the results are likely to have been affected by non-response bias, the analysis of the primary outcome for ‘low risk’ women was repeated, restricting the sample to units and trusts that included at least 85% of eligible women.

74% (203/271) of participating units and trusts included 85% or more of eligible women (Table 5.1). This sensitivity analysis was restricted to the 203 units and trusts that included 85% or more of eligible women.

**Table 5.1: Proportion of units and trusts with a response rate  $\geq 85\%$  by planned place of birth**

|       | Response rate |    |             |    | Poor or missing denominator |    | Total |
|-------|---------------|----|-------------|----|-----------------------------|----|-------|
|       | $<85\%$       |    | $\geq 85\%$ |    |                             |    |       |
|       | n             | %  | n           | %  | n                           | %  | n     |
| OU    | 11            | 31 | 24          | 67 | 1                           | 3  | 36    |
| Home  | 16            | 11 | 113         | 80 | 13                          | 9  | 142   |
| FMU   | 13            | 25 | 35          | 66 | 5                           | 9  | 53    |
| AMU   | 7             | 16 | 31          | 72 | 5                           | 12 | 43    |
| Total | 47            | 17 | 203         | 74 | 24                          | 9  | 274   |

Units/trusts that provided denominator data, which enabled a response rate to be calculated, included a higher proportion of women than units with ‘poor or missing’ denominator data. The 9% of units/trusts (n=24) with ‘poor or missing’ denominator data contributed only 3% of births (n=2587) to the study sample (Table 5.2).

**Table 5.2: Proportion of women included by response rate and planned place of birth**

|       | Response rate |    |             |    | Poor or missing denominator |   | Total |
|-------|---------------|----|-------------|----|-----------------------------|---|-------|
|       | $<85\%$       |    | $\geq 85\%$ |    |                             |   |       |
|       | n             | %  | n           | %  | n                           | % | n     |
| OU    | 8513          | 26 | 23230       | 72 | 514                         | 2 | 32257 |
| Home  | 1446          | 8  | 15883       | 87 | 940                         | 5 | 18269 |
| FMU   | 1479          | 13 | 9858        | 85 | 329                         | 3 | 11666 |
| AMU   | 3077          | 18 | 13701       | 78 | 804                         | 5 | 17582 |
| Total | 14515         | 18 | 62672       | 79 | 2587                        | 3 | 79774 |

The 203 units with a response rate of at least 85% also had higher return rates for the neonatal and maternal morbidity forms compared with all participating units and trusts (96% vs. 94% neonatal forms returned; 96% vs. 93% maternal forms returned, Table 5.3).

**Table 5.3: Morbidity form return rates for units/trusts with response rate of at least 85%**

|       | Neonatal morbidity forms |    |              |   |       | Maternal morbidity forms |    |              |   |       |
|-------|--------------------------|----|--------------|---|-------|--------------------------|----|--------------|---|-------|
|       | Returned                 |    | Not returned |   | Total | Returned                 |    | Not returned |   | Total |
|       | n                        | %  | n            | % | n     | n                        | %  | n            | % | n     |
| OU    | 1054                     | 98 | 17           | 2 | 1071  | 578                      | 98 | 10           | 2 | 588   |
| Home  | 423                      | 97 | 14           | 3 | 437   | 192                      | 94 | 12           | 6 | 204   |
| FMU   | 265                      | 95 | 15           | 5 | 280   | 134                      | 94 | 9            | 6 | 143   |
| AMU   | 343                      | 92 | 30           | 8 | 373   | 211                      | 93 | 17           | 7 | 228   |
| Total | 2085                     | 96 | 76           | 4 | 2161  | 1115                     | 96 | 48           | 4 | 1163  |

The effect of planned place of birth on the primary outcome in this restricted subset of units/trusts with a response rate of at least 85% was consistent with the results of the primary analysis of all ‘low risk’ women. The weighted event rates were similar to the primary analysis for both the all ‘low risk’ women analysis and the analysis of ‘low risk’ women without complicating conditions at the start of care in labour (Table 5.4).

Overall for all ‘low risk’ women, there were no statistically significant differences in the odds of a primary outcome event by planned place of birth. For the restricted analysis of ‘low risk’ women without complicating conditions at the start of care in labour, there was an increase in the odds of a primary outcome event in the planned home birth group (adjusted OR 1.90, 95% CI 1.11 to 3.25, Table 5.4).



When stratified by parity, the apparent increased odds of a primary outcome event for nulliparous women in the planned home birth group remained in the analysis of all 'low risk' women (adjusted OR 2.18, 95% CI 1.27 to 3.76) and the analysis of 'low risk' women without complicating conditions (adjusted OR 4.65, 95% CI 2.42 to 8.92).

In this analysis restricted to centres with a response rate of at least 85%, there was an apparent increase in the odds of a primary outcome event for nulliparous 'low risk' women without complicating conditions in the planned FMU group (adjusted OR 2.29, 95% CI 1.17 to 4.47).

**Table 5.4: Primary outcome for babies of 'low risk' women restricted to units with a response rate of at least 85%**

|                                                                                                              | Events<br>n | Births<br>n | Incidence*<br>n/1000<br>(95% CI) | Unadjusted*<br>OR<br>(95% CI) | Unadjusted*†<br>OR<br>(95% CI) | Adjusted*‡<br>OR<br>(95% CI) |
|--------------------------------------------------------------------------------------------------------------|-------------|-------------|----------------------------------|-------------------------------|--------------------------------|------------------------------|
| <b>All 'low risk' women</b>                                                                                  |             |             |                                  |                               |                                |                              |
|                                                                                                              |             |             |                                  | n=51123                       | n=49886                        | n=49886                      |
| OU                                                                                                           | 62          | 14253       | 4.6<br>(3.3-6.4)                 | 1                             | 1                              | 1                            |
| Home                                                                                                         | 67          | 14504       | 4.8<br>(3.7-6.1)                 | 1.04<br>(0.68-1.59)           | 1.05<br>(0.69-1.60)            | 1.33<br>(0.84-2.10)          |
| FMU                                                                                                          | 37          | 9475        | 4.1<br>(2.9-5.7)                 | 0.89<br>(0.55-1.43)           | 0.91<br>(0.57-1.46)            | 1.09<br>(0.69-1.73)          |
| AMU                                                                                                          | 44          | 12891       | 3.4<br>(2.4-4.7)                 | 0.74<br>(0.46-1.18)           | 0.76<br>(0.48-1.21)            | 0.86<br>(0.56-1.31)          |
| Total                                                                                                        | 210         | 51123       | 4.4<br>(3.3-5.9)                 |                               |                                |                              |
| <b>All 'low risk' women by parity<sup>§</sup></b>                                                            |             |             |                                  |                               |                                |                              |
| <b>Nulliparous women</b>                                                                                     |             |             |                                  |                               |                                |                              |
|                                                                                                              |             |             |                                  | n=22604                       | n=22078                        | n=22078                      |
| OU                                                                                                           | 38          | 7740        | 5.3<br>(3.6-7.7)                 | 1                             | 1                              | 1                            |
| Home                                                                                                         | 38          | 3983        | 10.6<br>(7.5-15.0)               | 2.01<br>(1.20-3.38)           | 2.04<br>(1.24-3.36)            | 2.18<br>(1.27-3.76)          |
| FMU                                                                                                          | 22          | 4384        | 5.2<br>(3.4-8.0)                 | 0.98<br>(0.55-1.76)           | 0.99<br>(0.56-1.74)            | 1.15<br>(0.66-2.02)          |
| AMU                                                                                                          | 27          | 6497        | 4.0<br>(2.7-6.0)                 | 0.75<br>(0.43-1.31)           | 0.77<br>(0.45-1.33)            | 0.87<br>(0.52-1.45)          |
| Total                                                                                                        | 125         | 22604       | 5.3<br>(3.8-7.3)                 |                               |                                |                              |
| <b>Multiparous women</b>                                                                                     |             |             |                                  |                               |                                |                              |
|                                                                                                              |             |             |                                  | n=28457                       | n=27808                        | n=27808                      |
| OU                                                                                                           | 24          | 6503        | 3.7<br>(2.4-5.8)                 | 1                             | 1                              | 1                            |
| Home                                                                                                         | 29          | 10509       | 2.5<br>(1.8-3.6)                 | 0.68<br>(0.38-1.20)           | 0.68<br>(0.38-1.22)            | 0.75<br>(0.41-1.36)          |
| FMU                                                                                                          | 15          | 5077        | 3.1<br>(1.8-5.3)                 | 0.84<br>(0.41-1.70)           | 0.88<br>(0.43-1.79)            | 0.99<br>(0.49-2.00)          |
| AMU                                                                                                          | 17          | 6368        | 2.7<br>(1.5-5.1)                 | 0.74<br>(0.34-1.59)           | 0.78<br>(0.36-1.69)            | 0.83<br>(0.39-1.74)          |
| Total                                                                                                        | 85          | 28457       | 3.5<br>(2.4-5.1)                 |                               |                                |                              |
| <b>'Low risk' women without complicating conditions at the start of care in labour</b>                       |             |             |                                  |                               |                                |                              |
|                                                                                                              |             |             |                                  | n=46116                       | n=45006                        | n=45006                      |
| OU                                                                                                           | 35          | 11505       | 3.0<br>(2.0-4.4)                 | 1                             | 1                              | 1                            |
| Home                                                                                                         | 59          | 13620       | 4.5<br>(3.4-5.9)                 | 1.51<br>(0.94-2.45)           | 1.58<br>(0.98-2.56)            | 1.90<br>(1.11-3.25)          |
| FMU                                                                                                          | 31          | 8950        | 3.6<br>(2.5-5.1)                 | 1.21<br>(0.72-2.06)           | 1.29<br>(0.77-2.18)            | 1.52<br>(0.91-2.52)          |
| AMU                                                                                                          | 41          | 12041       | 3.1<br>(2.2-4.5)                 | 1.05<br>(0.62-1.79)           | 1.13<br>(0.66-1.92)            | 1.25<br>(0.76-2.04)          |
| Total                                                                                                        | 166         | 46116       | 3.1<br>(2.3-4.2)                 |                               |                                |                              |
| <b>'Low risk' women without complicating conditions at the start of care in labour by parity<sup>‡</sup></b> |             |             |                                  |                               |                                |                              |
| <b>Nulliparous women</b>                                                                                     |             |             |                                  |                               |                                |                              |
|                                                                                                              |             |             |                                  | n=19577                       | n=19119                        | n=19119                      |
| OU                                                                                                           | 17          | 5947        | 2.8<br>(1.7-4.5)                 | 1                             | 1                              | 1                            |
| Home                                                                                                         | 35          | 3611        | 10.8<br>(7.5-15.6)               | 3.88<br>(2.12-7.12)           | 4.10<br>(2.28-7.38)            | 4.65<br>(2.42-8.92)          |
| FMU                                                                                                          | 20          | 4074        | 5.2<br>(3.3-8.3)                 | 1.85<br>(0.95-3.63)           | 1.95<br>(1.01-3.75)            | 2.29<br>(1.17-4.47)          |
| AMU                                                                                                          | 24          | 5945        | 3.4<br>(2.2-5.2)                 | 1.21<br>(0.64-2.29)           | 1.29<br>(0.69-2.40)            | 1.47<br>(0.79-2.73)          |
| Total                                                                                                        | 96          | 19577       | 3.2<br>(2.2-4.5)                 |                               |                                |                              |
| <b>Multiparous women</b>                                                                                     |             |             |                                  |                               |                                |                              |
|                                                                                                              |             |             |                                  | n=26484                       | n=25887                        | n=25887                      |
| OU                                                                                                           | 18          | 5552        | 3.2<br>(1.8-5.5)                 | 1                             | 1                              | 1                            |
| Home                                                                                                         | 24          | 9998        | 2.2<br>(1.5-3.2)                 | 0.69<br>(0.35-1.36)           | 0.70<br>(0.35-1.39)            | 0.78<br>(0.40-1.54)          |
| FMU                                                                                                          | 11          | 4864        | 2.3<br>(1.3-4.0)                 | 0.73<br>(0.33-1.60)           | 0.78<br>(0.36-1.72)            | 0.89<br>(0.42-1.88)          |
| AMU                                                                                                          | 17          | 6070        | 2.9<br>(1.5-5.3)                 | 0.91<br>(0.39-2.09)           | 0.98<br>(0.43-2.27)            | 1.05<br>(0.47-2.37)          |
| Total                                                                                                        | 70          | 26484       | 3.0<br>(1.9-4.8)                 |                               |                                |                              |

\* Weighted to reflect each unit's duration of participation, the sampling of obstetric units and to take the clustered nature of the data into account.

† Restricted to women included in the adjusted analysis.

‡ Adjusted for maternal age, ethnic group, understanding of English, marital/partner status, body mass index, Index of Multiple Deprivation score quintile, previous pregnancies  $\geq 24$  completed weeks, and gestation (completed weeks).

§ All 'low risk' by parity adjusted regression tests of heterogeneity p-values: Overall 0.02; Pairwise: Home 0.005; FMU 0.72; AMU 0.92

‡ 'Low risk' without complicating conditions at the start of care in labour by parity adjusted regression tests of heterogeneity p-values: Overall  $<0.001$ ; Pairwise: Home  $<0.001$ ; FMU 0.07; AMU 0.53

## Appendix 6: Sensitivity analysis, propensity score analysis

### Propensity score analysis

In the 'low risk' group of women, a sensitivity analysis was carried out using propensity scores to examine in more detail the impact on the results of the differences in the characteristics of the women in the different groups. These analyses were carried out separately for each non-OU setting compared with the OU group.

We summarised the imbalance in baseline characteristics, maternal characteristics and complicating conditions identified at the start of care in labour, between each non-OU group and the OU group using standardised differences (Figure 6.1, Figure 6.2, and Figure 6.3). Categorical variables were collapsed into binary variables and standardised differences in proportions were calculated. For continuous variables, standardised differences in means were calculated. A standardised difference of more than 10% indicates serious imbalance.<sup>30</sup> There were a higher proportion of women with complicating conditions identified at the start of care in labour in the OU group compared with all other planned places of birth. In particular, a higher proportion of women in the OU group had prolonged rupture of membranes (for longer than 18 hours) and meconium stained liquor. There were also large differences in the socio-demographic characteristics of women who planned to give birth in an FMU or at home compared with the OU group. Women in the planned home and FMU groups were more likely to be White, have a fluent understanding of English, to live in a more socioeconomically advantaged area, to be older, and married or living with their partner. The most striking differences were in the age and parity of women in the home group compared with the women in the OU group: they tended to be older and more likely to have given birth previously.

For each non-OU/OU comparison, a propensity score was calculated for each woman which represents the probability that the woman would plan to give birth in the non-OU setting, based on her maternal characteristics and any complicating conditions identified at the start of care in labour. The distribution of the propensity scores for the three non-OU/OU comparisons are presented in Figure 6.4, Figure 6.5, and Figure 6.6. For each figure, a low propensity score indicates a low propensity to plan birth in the non-OU setting. Conversely, a high propensity score indicates a high propensity to plan birth in the non-OU setting. Most of the women in the OU group had a low propensity to plan a home birth, and most of the women in the home group had a high propensity to plan a home birth. The distributions of propensity scores for the midwifery units were more similar to the OU group, particularly in the AMU group which reflects the similar characteristics of the women in the AMU and OU groups.

Women were divided into quintiles based on the rank of their propensity scores. The covariate imbalance was compared within each propensity score quintile (Figure 6.7, Figure 6.8, and Figure 6.9). Good balance was achieved in quintiles 2 to 5 for each comparison. Quintile 1, which contains women with the lowest propensity to plan birth in the non-OU setting, was still not well-balanced for some covariates after stratification by propensity score quintile. For planned home births, the remaining imbalance in quintile 1 was due to socio-demographic characteristics. For both types of midwifery unit, the remaining imbalance in quintile 1 was due to complicating conditions identified at the start of care in labour.

The analysis of the primary outcome was repeated within each propensity score quintile for each non-OU/OU comparison (Table 6.1, Table 6.2 and Table 6.3). Unadjusted odds ratios are presented, as the numbers of events in each quintile were too small to perform a reliable adjusted analysis. The incidence of the primary outcome was lower for women whose characteristics were consistent with a high probability of planning birth in a non-OU setting. The quintile containing women with the lowest propensity to plan birth outside of an OU had the highest incidence of the primary outcome. This was observed for all planned places of birth, including OUs. There were no discernable patterns or trends evident in the quintile specific odds ratios. Tests for heterogeneity showed no evidence of a difference between the quintile specific odds ratios for each planned place of birth.

**Figure 6.1: Covariate imbalance between planned home births and planned obstetric unit births**

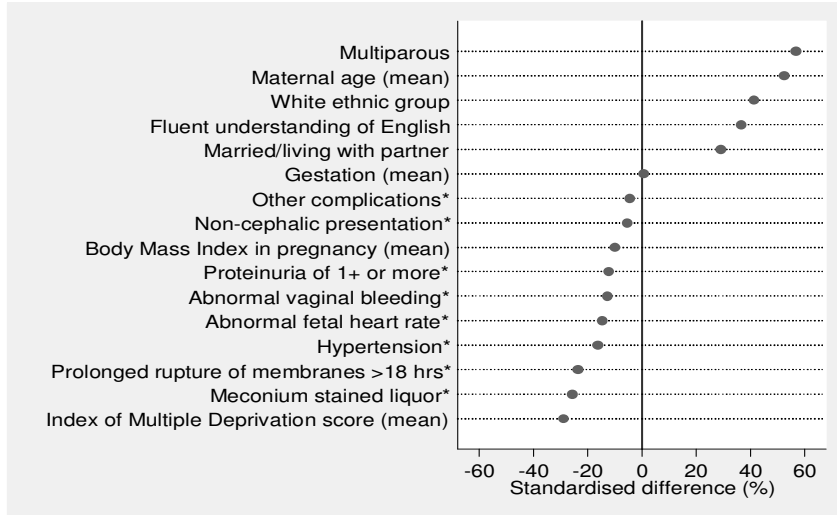

**Figure 6.2: Covariate imbalance between planned alongside midwifery unit births and planned obstetric unit births**

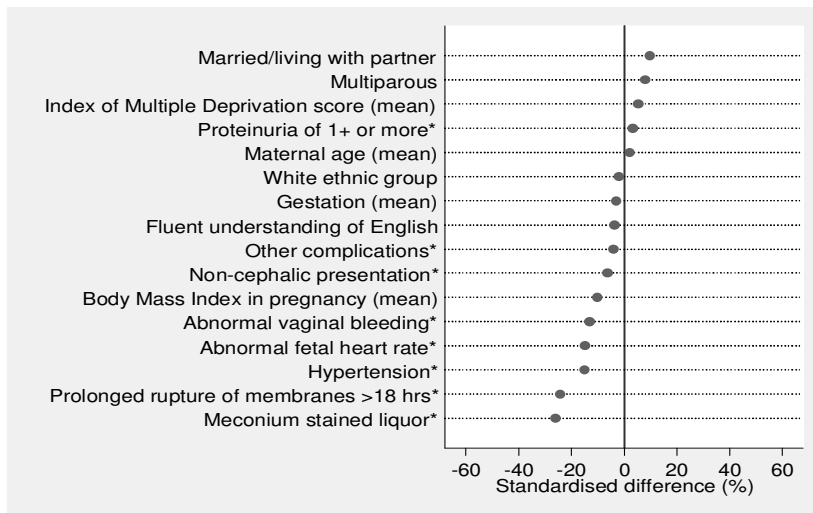

**Figure 6.3: Covariate imbalance between planned freestanding midwifery unit births and planned obstetric unit births**

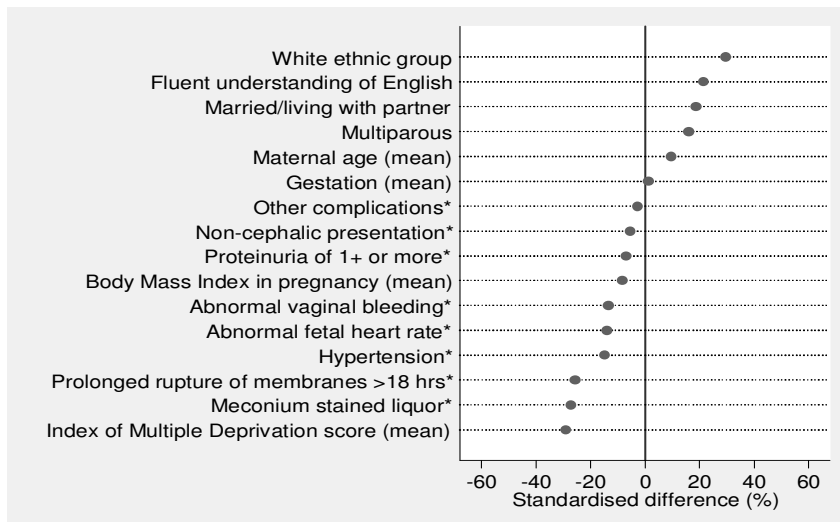

\* Complicating conditions identified at the start of care in labour.

**Figure 6.4: Distribution of propensity scores for planned home births and planned obstetric unit births**

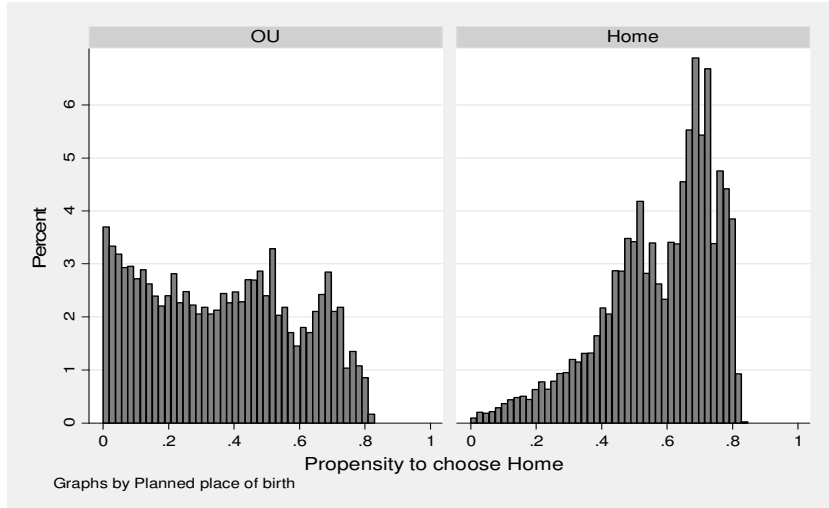

**Figure 6.5: Distribution of propensity scores for planned alongside midwifery unit births and planned obstetric unit births**

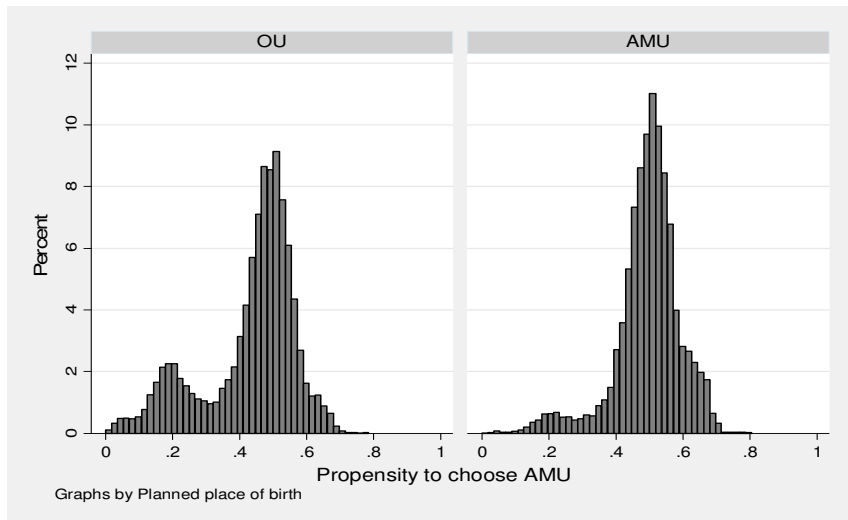

**Figure 6.6: Distribution of propensity scores for planned freestanding midwifery unit births and planned obstetric unit births**

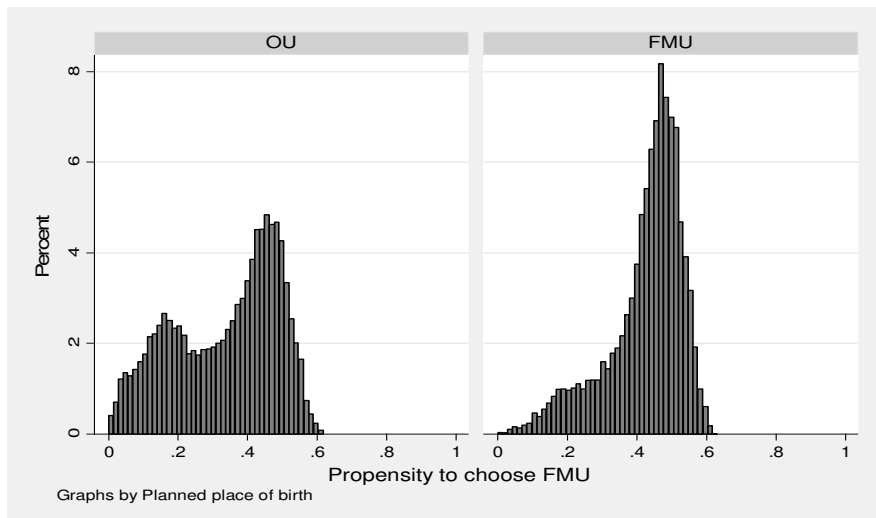

**Figure 6.7: Covariate imbalance between planned home births and planned OU births within propensity score quintile**

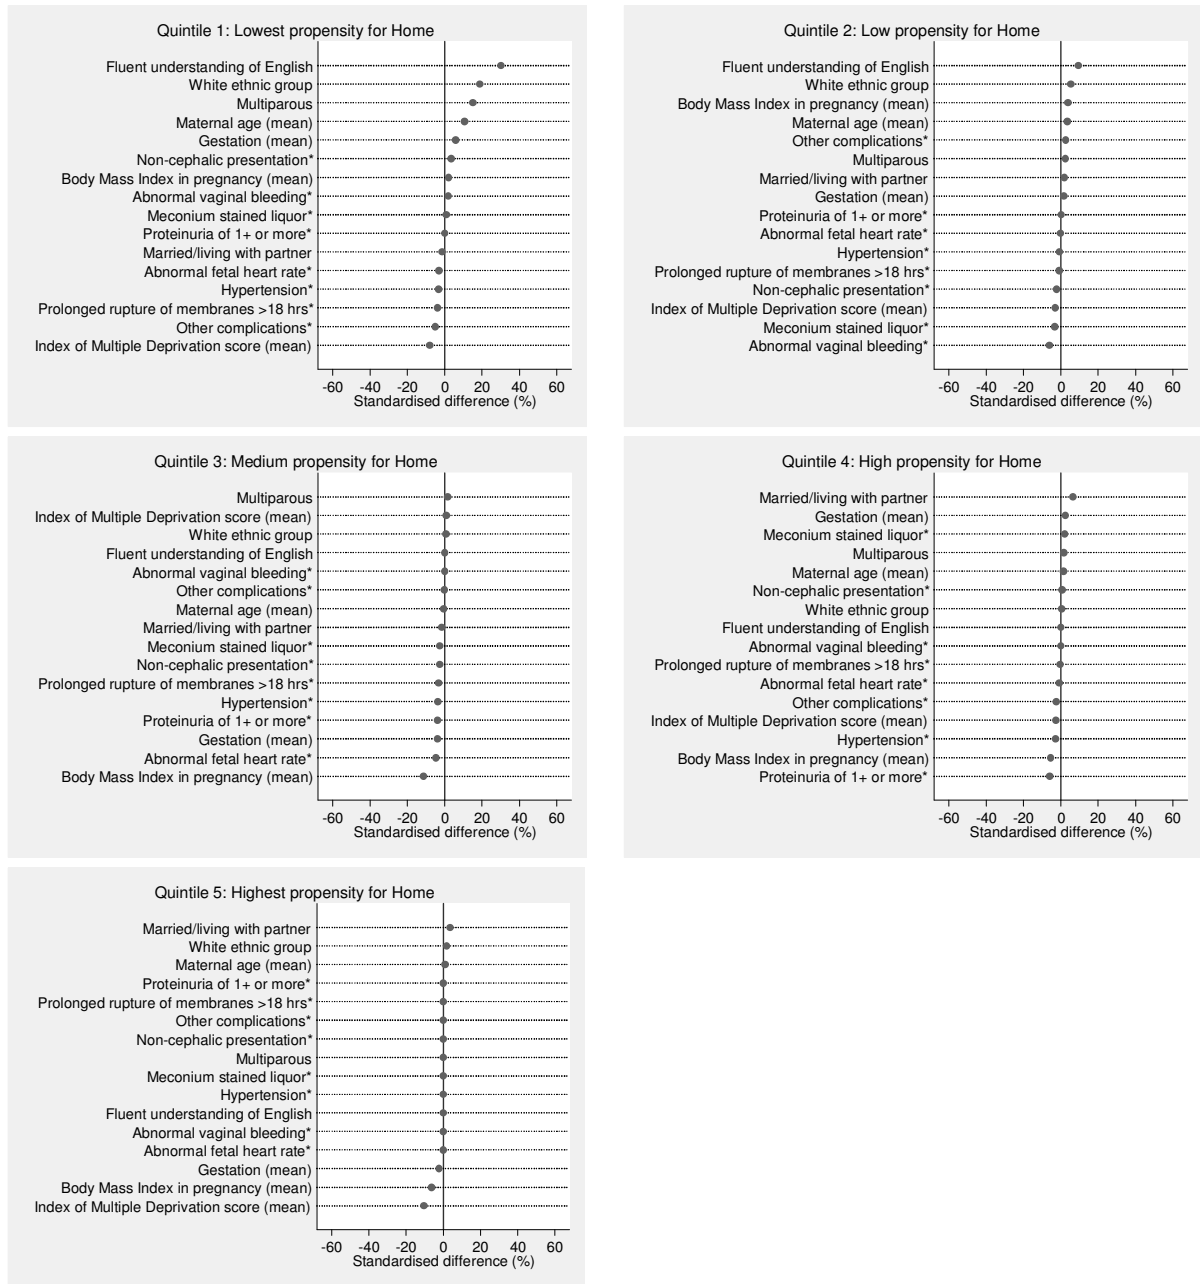

\* Complicating conditions identified at the start of care in labour.



**Figure 6.8: Covariate imbalance between planned alongside midwifery unit births and planned obstetric unit births within propensity score quintile**

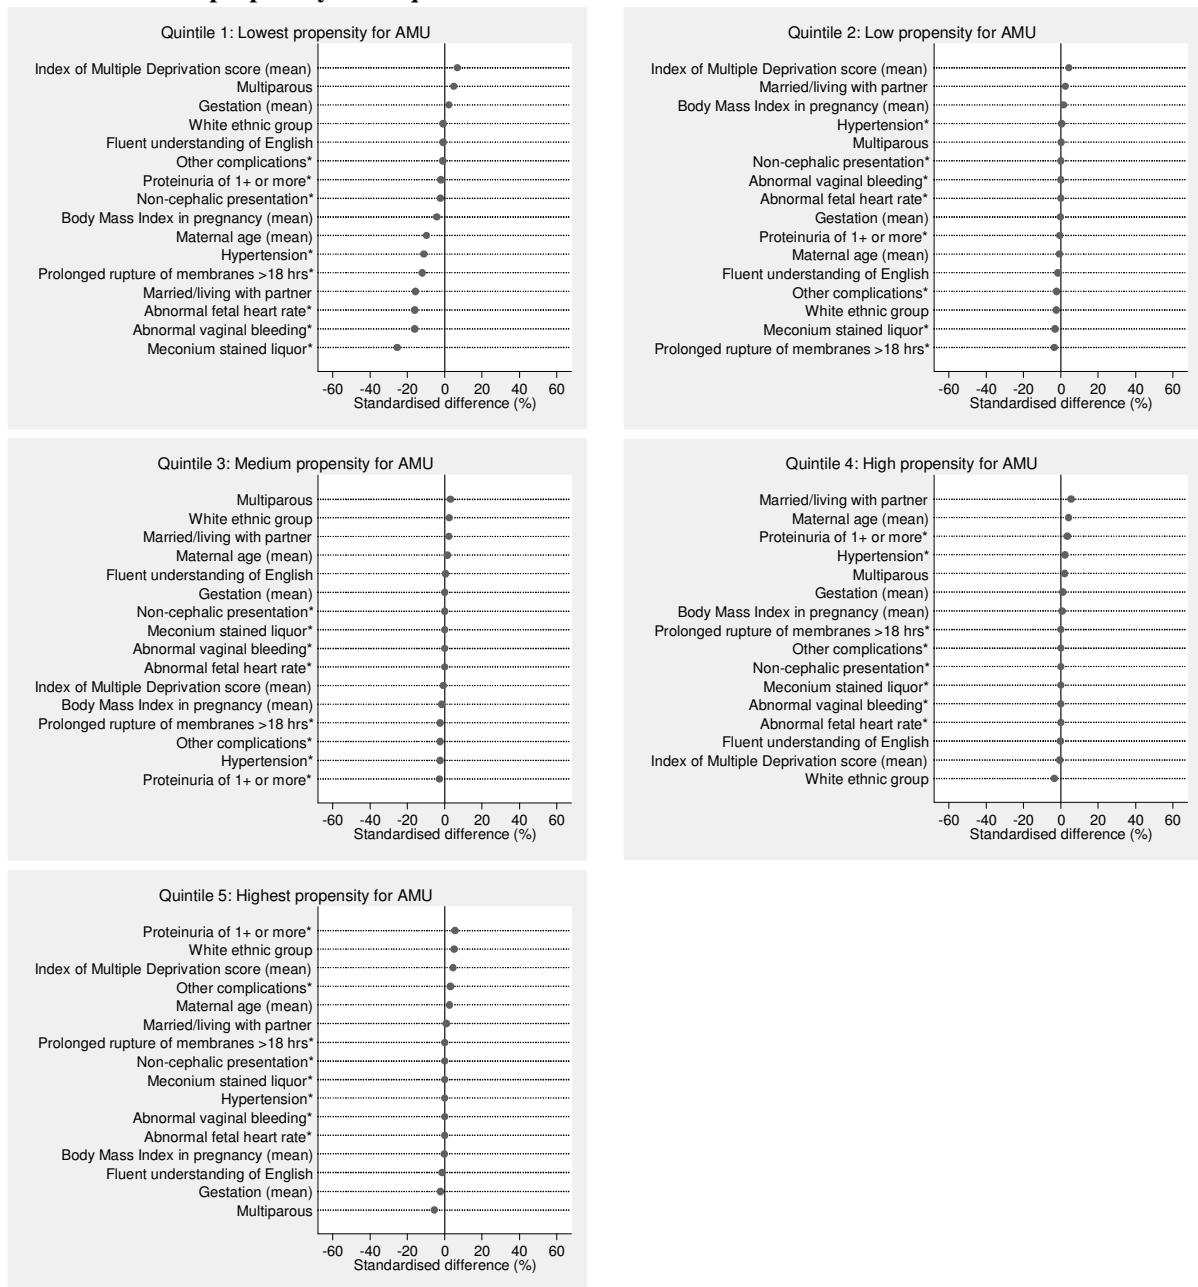

\* Complicating conditions identified at the start of care in labour.

**Figure 6.9: Covariate imbalance between planned freestanding midwifery unit births and planned obstetric unit births within propensity score quintile**

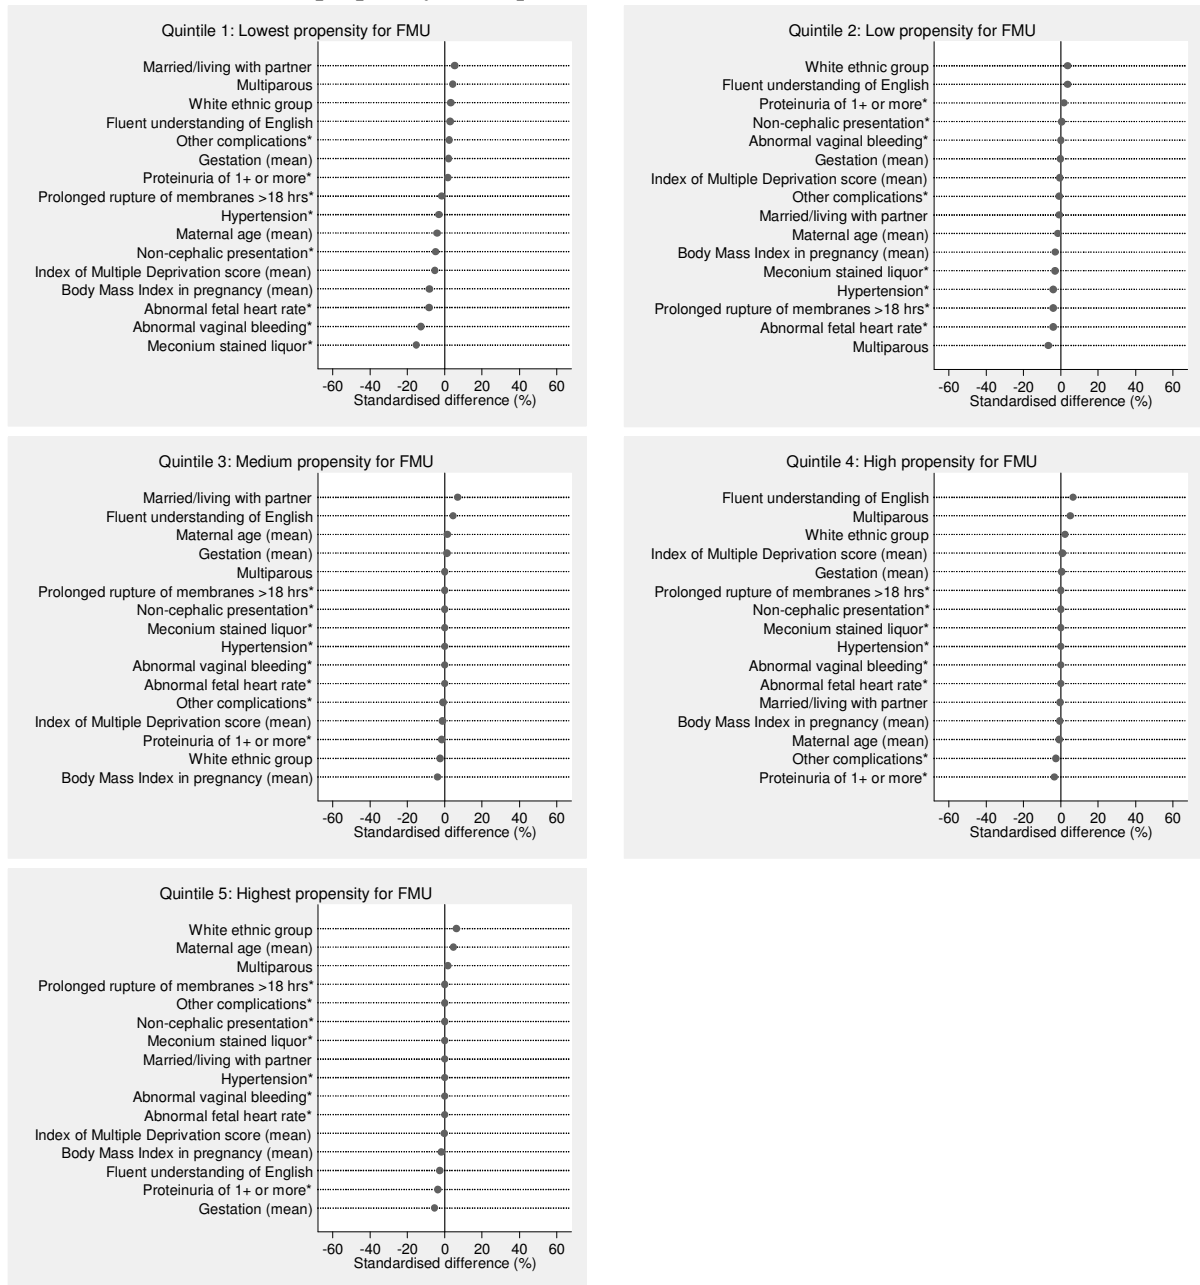

\* Complicating conditions identified at the start of care in labour.

**Table 6.1: Primary outcome for babies of all ‘low risk’ women for planned home births compared with planned obstetric unit births by propensity score quintile**

| Propensity to plan birth at home |                  |              | Obstetric unit |        |           | Home   |        |           | Unadjusted* |                          |
|----------------------------------|------------------|--------------|----------------|--------|-----------|--------|--------|-----------|-------------|--------------------------|
| quintile                         | Propensity score |              | Events         | Births | Incidence | Events | Births | Incidence | OR          | (95% CI)                 |
|                                  | median           | [range]      | n              | n      | n/1000*   | n      | n      | n/1000*   |             |                          |
| 1 Lowest                         | 0.11             | [0.00, 0.22] | 37             | 6291   | 6.5       | 6      | 696    | 7.1       | 1.09        | (0.42-2.83)              |
| 2 Low                            | 0.34             | [0.22, 0.43] | 17             | 4734   | 3.9       | 12     | 2258   | 7.7       | 1.98        | (0.77-5.09)              |
| 3 Medium                         | 0.49             | [0.43, 0.56] | 17             | 3354   | 4.9       | 26     | 3604   | 5.9       | 1.22        | (0.65-2.27)              |
| 4 High                           | 0.64             | [0.56, 0.69] | 5              | 2595   | 1.7       | 13     | 4358   | 3.4       | 2.00        | (0.74-5.42)              |
| 5 Highest                        | 0.74             | [0.69, 0.85] | 3              | 1820   | 1.4       | 12     | 5149   | 1.9       | 1.34        | (0.37-4.79)              |
| <b>Overall</b>                   | 0.49             | [0.00, 0.85] | 79             | 18,794 | 4.4       | 69     | 16,065 | 4.3       | 1.50        | (0.99-2.27) <sup>†</sup> |

\* Weighted to reflect each unit’s duration of participation, the sampling of obstetric units and to take the clustered nature of the data into account.

<sup>†</sup> Overall OR, weighted and adjusted for quintile. Test of heterogeneity across quintiles p value = 0.84 (Wald test).

**Table 6.2: Primary outcome for babies of all ‘low risk’ women for planned alongside midwifery unit births compared with planned obstetric unit births by propensity score quintile**

| Propensity to plan birth at an AMU |                  |              | Obstetric unit |        |           | Alongside midwifery unit |        |           | Unadjusted* |                          |
|------------------------------------|------------------|--------------|----------------|--------|-----------|--------------------------|--------|-----------|-------------|--------------------------|
| quintile                           | Propensity score |              | Events         | Births | Incidence | Events                   | Births | Incidence | OR          | (95% CI)                 |
|                                    | median           | [range]      | n              | n      | n/1000*   | n                        | n      | n/1000*   |             |                          |
| 1 Lowest                           | 0.24             | [0.00, 0.40] | 39             | 5245   | 8.4       | 11                       | 1726   | 7.4       | 0.88        | (0.35-2.18)              |
| 2 Low                              | 0.44             | [0.40, 0.47] | 18             | 3851   | 4.4       | 15                       | 3109   | 4.9       | 1.14        | (0.53-2.46)              |
| 3 Medium                           | 0.49             | [0.47, 0.51] | 7              | 3580   | 1.9       | 12                       | 3378   | 3.2       | 1.72        | (0.70-4.21)              |
| 4 High                             | 0.53             | [0.51, 0.55] | 9              | 3327   | 2.9       | 8                        | 3618   | 1.3       | 0.43        | (0.13-1.39)              |
| 5 Highest                          | 0.58             | [0.55, 0.80] | 6              | 2791   | 2.3       | 12                       | 4171   | 3.8       | 1.68        | (0.50-5.61)              |
| <b>Overall</b>                     | 0.49             | [0.00, 0.80] | 79             | 18,794 | 4.4       | 58                       | 16,002 | 3.7       | 1.09        | (0.69-1.72) <sup>†</sup> |

\* Weighted to reflect each unit’s duration of participation, the sampling of obstetric units and to take the clustered nature of the data into account.

<sup>†</sup> Overall OR, weighted and adjusted for quintile. Test of heterogeneity across quintiles p value = 0.34 (Wald test).

**Table 6.3: Primary outcome for babies of all ‘low risk’ women for planned freestanding midwifery unit births compared with planned obstetric unit births by propensity score quintile**

| Propensity to plan birth at an FMU |                  |              | Obstetric unit |        |           | Freestanding midwifery unit |        |           | Unadjusted* |                          |
|------------------------------------|------------------|--------------|----------------|--------|-----------|-----------------------------|--------|-----------|-------------|--------------------------|
| quintile                           | Propensity score |              | Events         | Births | Incidence | Events                      | Births | Incidence | OR          | (95% CI)                 |
|                                    | median           | [range]      | n              | n      | n/1000*   | n                           | n      | n/1000*   |             |                          |
| 1 Lowest                           | 0.14             | [0.00, 0.22] | 38             | 5169   | 8.0       | 8                           | 789    | 9.3       | 1.17        | (0.62-2.19)              |
| 2 Low                              | 0.30             | [0.22, 0.37] | 14             | 4169   | 3.4       | 9                           | 1791   | 5.5       | 1.61        | (0.69-3.76)              |
| 3 Medium                           | 0.41             | [0.37, 0.44] | 11             | 3566   | 3.5       | 6                           | 2397   | 2.1       | 0.58        | (0.22-1.52)              |
| 4 High                             | 0.47             | [0.44, 0.49] | 12             | 3100   | 3.6       | 13                          | 2844   | 3.9       | 1.09        | (0.47-2.52)              |
| 5 Highest                          | 0.52             | [0.49, 0.62] | 4              | 2790   | 1.2       | 5                           | 3139   | 2.0       | 1.67        | (0.44-6.40)              |
| <b>Overall</b>                     | 0.41             | [0.00, 0.62] | 79             | 18,794 | 4.4       | 41                          | 10,960 | 3.6       | 1.14        | (0.73-1.77) <sup>†</sup> |

\* Weighted to reflect each unit’s duration of participation, the sampling of obstetric units and to take the clustered nature of the data into account.

<sup>†</sup> Overall OR, weighted and adjusted for quintile. Test of heterogeneity across quintiles p value = 0.31 (Wald test).

## Appendix 7: Summary of missing data

### Risk status

Data regarding whether the woman was known to have any ‘risk factors’, prior to the onset of labour, were recorded for over 99% of the 79,774 eligible women for whom data were collected. Only 451 women in the sample had missing ‘risk status’ and these data were missing for fewer than 1% of women in each setting (Table 7.1).

**Table 7.1: Summary of missing ‘risk status’ data for all women by planned place of birth**

| Unit type | Risk status missing |     | Total births |
|-----------|---------------------|-----|--------------|
|           | n                   | %   | n            |
| OU        | 177                 | 0.5 | 32257        |
| Home      | 83                  | 0.5 | 18269        |
| FMU       | 95                  | 0.8 | 11666        |
| AMU       | 96                  | 0.5 | 17582        |
| Total     | 451                 | 0.6 | 79774        |

### Primary outcome and confounders

Overall, 711 births from ‘low risk’ women (1.1%) had a missing primary outcome and were excluded from the unadjusted estimates of the incidence of the primary outcome (Table 7.2).

For the adjusted analyses, births were excluded where any data for potential confounders were missing. Of all births from ‘low risk’ women, 2.9% (1903 births) were missing some confounder data (Table 7.2).

Taking both the missing primary outcome data and missing confounder data into account, 3.9% of ‘low risk’ births (2502) were excluded from the primary analysis (Table 7.2). In each setting, the completeness of data collection was good with over 95% of ‘low risk’ women included in the primary adjusted analyses.

**Table 7.2: Summary of missing data for all ‘low risk’ women by planned place of birth**

| Unit type | All ‘low risk’ | Primary outcome missing |     | Confounder missing |     | Primary analysis |     |          |      |
|-----------|----------------|-------------------------|-----|--------------------|-----|------------------|-----|----------|------|
|           | n              | n                       | %   | n                  | %   | Excluded*        |     | Included |      |
|           |                |                         |     |                    |     | n                | %   | n        | %    |
| OU        | 19706          | 155                     | 0.8 | 724                | 3.7 | 859              | 4.4 | 18847    | 95.6 |
| Home      | 16840          | 287                     | 1.7 | 414                | 2.5 | 653              | 3.9 | 16187    | 96.1 |
| FMU       | 11282          | 83                      | 0.7 | 241                | 2.1 | 311              | 2.8 | 10971    | 97.2 |
| AMU       | 16710          | 186                     | 1.1 | 524                | 3.1 | 679              | 4.1 | 16031    | 95.9 |
| Total     | 64538          | 711                     | 1.1 | 1903               | 2.9 | 2502             | 3.9 | 62036    | 96.1 |

\* Births were excluded if either the primary outcome or any of the potential confounders was missing.

One observation with a primary outcome recorded was dropped from both the unadjusted and adjusted analyses because the woman’s ‘risk status’ was missing. This birth was planned in an AMU and the outcome was a clinical diagnosis of neonatal encephalopathy.

Three births with a primary outcome recorded were dropped from the adjusted analyses due to missing confounder data (1.2% of the 250 primary outcome events for ‘low risk’ births). Two were planned OU births (one meconium aspiration syndrome and one clinical neonatal encephalopathy); one was a planned home birth (clinical diagnosis of neonatal encephalopathy).

The primary outcome was coded as missing where at least one component of the primary outcome was missing and no other components were recorded as having occurred. Three questions on the data collection forms contributed to the primary outcome: a question listing 13 neonatal morbidities with an option ‘no morbidity identified’, a Yes/No question about death at the time the form was completed, and a Yes/No question about whether there was a stillbirth. The majority of births where the primary outcome was missing had the neonatal morbidity question left blank (0.9%, 583 observations), fewer observations had the death question left blank (0.4%, 246 observations), and the stillbirth question was missing for 3 observations (Table 7.3). Both the

neonatal morbidity question and death question were in a section of the form relating to adverse outcomes and it may be that where no morbidity was observed these questions were more likely to be left incomplete.

**Table 7.3: Missing primary outcome data for all 'low risk' women by planned place of birth**

| Unit type | Missing component of the primary outcome |     |                      |     |            |     | Primary outcome data complete |      | All 'low risk' |
|-----------|------------------------------------------|-----|----------------------|-----|------------|-----|-------------------------------|------|----------------|
|           | A neonatal morbidity                     |     | Early neonatal death |     | Stillbirth |     | n                             | %    | n              |
|           | n                                        | %   | n                    | %   | n          | %   |                               |      |                |
| OU        | 119                                      | 0.6 | 69                   | 0.4 | 0          | -   | 19551                         | 99.2 | 19706          |
| Home      | 251                                      | 1.5 | 81                   | 0.5 | 1          | 0.0 | 16553                         | 98.3 | 16840          |
| FMU       | 72                                       | 0.6 | 19                   | 0.2 | 0          | -   | 11199                         | 99.3 | 11282          |
| AMU       | 141                                      | 0.8 | 77                   | 0.5 | 2          | 0.0 | 16524                         | 98.9 | 16710          |
| Total     | 583                                      | 0.9 | 246                  | 0.4 | 3          | 0.0 | 63827                         | 98.9 | 64538          |

Women's marital or partner status was the confounder with the most missing data, 1.2% overall for 'low risk' women. The OU (1.6% missing) and AMU (1.5% missing) groups had the highest proportion of missing data for this variable. All other potential confounders had fewer than 1.0% missing data both overall and for each planned place of birth (Table 7.4).

**Table 7.4: Missing data for potential confounders for all 'low risk' women by planned place of birth**

| Potential confounders               | Missing data for potential confounders |     |                 |     |                |     |                |     |                  |     |
|-------------------------------------|----------------------------------------|-----|-----------------|-----|----------------|-----|----------------|-----|------------------|-----|
|                                     | OU<br>n=19706                          |     | Home<br>n=16840 |     | FMU<br>n=11282 |     | AMU<br>n=16710 |     | Total<br>n=64538 |     |
|                                     | n                                      | %   | n               | %   | n              | %   | n              | %   | n                | %   |
| Maternal age                        | 25                                     | 0.1 | 34              | 0.2 | 14             | 0.1 | 38             | 0.2 | 111              | 0.2 |
| Ethnicity                           | 27                                     | 0.1 | 21              | 0.1 | 5              | 0   | 37             | 0.2 | 90               | 0.1 |
| Understanding of English            | 152                                    | 0.8 | 26              | 0.2 | 27             | 0.2 | 64             | 0.4 | 269              | 0.4 |
| Marital or partner status           | 320                                    | 1.6 | 111             | 0.7 | 120            | 1.1 | 243            | 1.5 | 794              | 1.2 |
| BMI in pregnancy                    | 55                                     | 0.3 | 94              | 0.6 | 17             | 0.2 | 66             | 0.4 | 232              | 0.4 |
| Index of multiple deprivation score | 126                                    | 0.6 | 118             | 0.7 | 31             | 0.3 | 48             | 0.3 | 323              | 0.5 |
| Parity                              | 31                                     | 0.2 | 16              | 0.1 | 17             | 0.2 | 37             | 0.2 | 101              | 0.2 |
| Gestation                           | 56                                     | 0.3 | 41              | 0.2 | 27             | 0.2 | 55             | 0.3 | 179              | 0.3 |



The proportion of births with missing primary outcome data was less than 2% for every potential confounder variable overall and within each category of the potential confounders (Table 7.5). There was a much higher proportion of missing primary outcome data for births that also had missing confounder data.

**Table 7.5: Distribution of missing primary outcome data for all ‘low risk’ women by baseline characteristic**

| Potential confounders                                  | Primary outcome |      |         |      | Total births<br>n |
|--------------------------------------------------------|-----------------|------|---------|------|-------------------|
|                                                        | Not missing     |      | Missing |      |                   |
|                                                        | n               | %    | n       | %    |                   |
|                                                        | 63827           | 98.9 | 711     | 1.1  | 64538             |
| <b>Maternal age</b>                                    |                 |      |         |      |                   |
| Under 20                                               | 3434            | 99.0 | 36      | 1.0  | 3470              |
| 20-24                                                  | 11477           | 99.1 | 101     | 0.9  | 11578             |
| 25-29                                                  | 18138           | 99.0 | 177     | 1.0  | 18315             |
| 30-34                                                  | 18525           | 98.8 | 216     | 1.2  | 18741             |
| 35-39                                                  | 10446           | 98.7 | 133     | 1.3  | 10579             |
| 40+                                                    | 1716            | 98.4 | 28      | 1.6  | 1744              |
| Missing                                                | 91              | 82.0 | 20      | 18.0 | 111               |
| <b>Ethnic group</b>                                    |                 |      |         |      |                   |
| White                                                  | 55185           | 98.9 | 634     | 1.1  | 55819             |
| Indian or Bangladeshi                                  | 1714            | 99.2 | 14      | 0.8  | 1728              |
| Pakistani                                              | 1379            | 99.5 | 7       | 0.5  | 1386              |
| Black Caribbean                                        | 633             | 99.2 | 5       | 0.8  | 638               |
| Black African                                          | 1385            | 99.2 | 11      | 0.8  | 1396              |
| Mixed                                                  | 1016            | 99.1 | 9       | 0.9  | 1025              |
| Other                                                  | 2434            | 99.1 | 22      | 0.9  | 2456              |
| Missing                                                | 81              | 90.0 | 9       | 10.0 | 90                |
| <b>Understanding of English</b>                        |                 |      |         |      |                   |
| Fluent                                                 | 60216           | 98.9 | 675     | 1.1  | 60891             |
| Some                                                   | 2633            | 99.2 | 21      | 0.8  | 2654              |
| None                                                   | 719             | 99.3 | 5       | 0.7  | 724               |
| Missing                                                | 259             | 96.3 | 10      | 3.7  | 269               |
| <b>Marital/partner status</b>                          |                 |      |         |      |                   |
| Married/living with partner                            | 57965           | 98.9 | 646     | 1.1  | 58611             |
| Single or unsupported by partner                       | 5094            | 99.2 | 39      | 0.8  | 5133              |
| Missing                                                | 768             | 96.7 | 26      | 3.3  | 794               |
| <b>Body mass index in pregnancy (kg/m<sup>2</sup>)</b> |                 |      |         |      |                   |
| Not recorded                                           | 11505           | 99.0 | 117     | 1.0  | 11622             |
| Less than 18.5                                         | 1547            | 99.0 | 16      | 1.0  | 1563              |
| 18.5-24.9                                              | 30516           | 99.0 | 318     | 1.0  | 30834             |
| 25.0-29.9                                              | 14774           | 98.8 | 175     | 1.2  | 14949             |
| 30.0-35.0                                              | 5285            | 99.0 | 53      | 1.0  | 5338              |
| Missing                                                | 200             | 86.2 | 32      | 13.8 | 232               |
| <b>Index of Multiple Deprivation score (quintile)</b>  |                 |      |         |      |                   |
| 1st Least deprived                                     | 11724           | 98.7 | 152     | 1.3  | 11876             |
| 2nd                                                    | 12179           | 98.8 | 152     | 1.2  | 12331             |
| 3rd                                                    | 12756           | 98.9 | 141     | 1.1  | 12897             |
| 4th                                                    | 13221           | 99.0 | 131     | 1.0  | 13352             |
| 5th Most deprived                                      | 13655           | 99.2 | 104     | 0.8  | 13759             |
| Missing                                                | 292             | 90.4 | 31      | 9.6  | 323               |
| <b>Previous pregnancies &gt;=24 completed weeks</b>    |                 |      |         |      |                   |
| Nulliparous                                            | 28443           | 99.0 | 288     | 1.0  | 28731             |
| Multiparous                                            | 35289           | 98.8 | 417     | 1.2  | 35706             |
| Missing                                                | 95              | 94.1 | 6       | 5.9  | 101               |
| <b>Gestation (completed weeks)</b>                     |                 |      |         |      |                   |
| 37                                                     | 1866            | 99.0 | 18      | 1.0  | 1884              |
| 38                                                     | 6025            | 99.1 | 55      | 0.9  | 6080              |
| 39                                                     | 15269           | 98.8 | 178     | 1.2  | 15447             |
| 40                                                     | 24157           | 98.9 | 271     | 1.1  | 24428             |
| 41                                                     | 15220           | 98.9 | 172     | 1.1  | 15392             |
| 42+                                                    | 1117            | 99.0 | 11      | 1.0  | 1128              |
| Missing                                                | 173             | 96.6 | 6       | 3.4  | 179               |

## Appendix 8: Supplementary results tables

### Occurrence of the components of the primary outcome by planned place of birth

The distribution of the outcomes contributing to the primary outcome is shown in Table 8. Neonatal encephalopathy and meconium aspiration syndrome were the most common events, together accounting for three quarters of the events in the composite primary outcome. Intrapartum stillbirths and early neonatal deaths accounted for 13% of the events contributing to the primary outcome. Fractured humerus and clavicle were uncommon outcomes and accounted for less than 4% of the primary outcome events.

**Table 8.1: Occurrence of the components of the primary outcome**

| Component of primary outcome*                | n   | % of the<br>primary<br>outcome |
|----------------------------------------------|-----|--------------------------------|
|                                              |     |                                |
| Stillbirth                                   | 14  | 5.6                            |
| Early neonatal death (within 7 days)         | 18  | 7.2                            |
| Neonatal encephalopathy (clinical diagnosis) | 96  | 38.4                           |
| Neonatal encephalopathy (signs)              | 18  | 7.2                            |
| Meconium aspiration syndrome                 | 75  | 30.0                           |
| Brachial plexus injury                       | 20  | 8.0                            |
| Fractured humerus                            | 2   | 0.8                            |
| Fractured clavicle                           | 7   | 2.8                            |
| Total                                        | 250 | 100                            |

\* The categories are mutually exclusive and outcomes listed higher in the table take precedence over outcomes listed lower down. For example, if a baby with neonatal encephalopathy died within 7 days the outcome is classified as an early neonatal death.

The distribution by planned place of birth is shown in Table 8.2.

**Table 8.2: Components of the primary outcome for all 'low risk' women by planned place of birth**

| Component of primary outcome*        | Primary outcome events |      |      |      |     |      |     |      |
|--------------------------------------|------------------------|------|------|------|-----|------|-----|------|
|                                      | OU                     |      | Home |      | FMU |      | AMU |      |
|                                      | n                      | %    | n    | %    | n   | %    | n   | %    |
| Stillbirth                           | 3                      | 3.7  | 6    | 8.6  | 4   | 9.8  | 1   | 1.7  |
| Early neonatal death (within 7 days) | 5                      | 6.2  | 5    | 7.1  | 5   | 12.2 | 3   | 5.2  |
| Neonatal encephalopathy (clinical)   | 32                     | 39.5 | 32   | 45.7 | 16  | 39.0 | 16  | 27.6 |
| Neonatal encephalopathy (signs)      | 8                      | 9.9  | 4    | 5.7  | 2   | 4.9  | 4   | 6.9  |
| Meconium aspiration syndrome         | 24                     | 29.6 | 15   | 21.4 | 11  | 26.8 | 25  | 43.1 |
| Brachial plexus injury               | 6                      | 7.4  | 5    | 7.1  | 2   | 4.9  | 7   | 12.1 |
| Fractured humerus                    | 1                      | 1.2  | 1    | 1.4  | 0   | 0.0  | 0   | 0.0  |
| Fractured clavicle                   | 2                      | 2.5  | 2    | 2.9  | 1   | 2.4  | 2   | 3.4  |
| Total                                | 81                     | 100  | 70   | 100  | 41  | 100  | 58  | 100  |

\* The categories are mutually exclusive and outcomes listed higher in the table take precedence over outcomes listed lower down. For example, if a baby with neonatal encephalopathy died within 7 days the outcome is classified as an early neonatal death.

The distribution for the restricted sample of women without complicating conditions identified at the start of care in labour by planned place of birth is shown in Table 8.3.

**Table 8.3: Components of the primary outcome for 'low risk' women without complicating conditions identified at the start of care in labour by planned place of birth**

| Component of primary outcome*        | Primary outcome events |      |      |      |     |      |     |      |
|--------------------------------------|------------------------|------|------|------|-----|------|-----|------|
|                                      | OU                     |      | Home |      | FMU |      | AMU |      |
|                                      | n                      | %    | n    | %    | n   | %    | n   | %    |
| Stillbirth                           | 3                      | 6.3  | 6    | 9.7  | 3   | 8.6  | 0   | 0.0  |
| Early neonatal death (within 7 days) | 2                      | 4.2  | 4    | 6.5  | 3   | 8.6  | 3   | 5.6  |
| Neonatal encephalopathy (clinical)   | 20                     | 41.7 | 28   | 45.2 | 15  | 42.9 | 15  | 27.8 |
| Neonatal encephalopathy (signs)      | 7                      | 14.6 | 3    | 4.8  | 2   | 5.7  | 4   | 7.4  |
| Meconium aspiration syndrome         | 11                     | 22.9 | 13   | 21.0 | 9   | 25.7 | 25  | 46.3 |
| Brachial plexus injury               | 3                      | 6.3  | 5    | 8.1  | 2   | 5.7  | 7   | 13.0 |
| Fractured humerus                    | 1                      | 2.1  | 1    | 1.6  | 0   | 0.0  | 0   | 0.0  |
| Fractured clavicle                   | 1                      | 2.1  | 2    | 3.2  | 1   | 2.9  | 0   | 0.0  |
| Total                                | 48                     | 100  | 62   | 100  | 35  | 100  | 54  | 100  |

\* The categories are mutually exclusive and outcomes listed higher in the table take precedence over outcomes listed lower down. For example, if a baby with neonatal encephalopathy died within 7 days the outcome is classified as an early neonatal death.

## Secondary perinatal outcomes

Most individual perinatal outcomes were rare and because of the small number of events odds ratios were not estimated. Table 8.4 shows unadjusted, weighted event rates for all of the secondary perinatal outcomes and adjusted odds ratios for the three more commonly occurring perinatal outcomes: neonatal unit admission, Apgar <7 at 5 minutes and not breastfed. As specified in the protocol, odds ratios are presented with 99% confidence intervals for secondary outcomes.

**Table 8.4: Perinatal outcomes for babies of all 'low risk' women by planned place of birth**

|                                                     | Events<br>n | Births<br>n | Incidence*<br>n/1000 | (99% CI)  |
|-----------------------------------------------------|-------------|-------------|----------------------|-----------|
| <b>Stillbirth</b>                                   |             |             |                      |           |
| OU                                                  | 3           | 19706       | 0.2                  | (0.0-0.7) |
| Home                                                | 6           | 16839       | 0.3                  | (0.1-1.0) |
| FMU                                                 | 4           | 11282       | 0.4                  | (0.1-2.2) |
| AMU                                                 | 1           | 16708       | 0.1                  | (0.0-0.8) |
| Total                                               | 14          | 64535       | 0.2                  | (0.1-0.5) |
| <b>Early neonatal death (within 7 days)</b>         |             |             |                      |           |
| OU                                                  | 5           | 19637       | 0.3                  | (0.1-0.8) |
| Home                                                | 5           | 16759       | 0.3                  | (0.1-1.0) |
| FMU                                                 | 5           | 11263       | 0.4                  | (0.1-1.3) |
| AMU                                                 | 3           | 16633       | 0.1                  | (0.0-0.7) |
| Total                                               | 18          | 64292       | 0.3                  | (0.1-0.6) |
| <b>Neonatal encephalopathy (clinical or signs)</b>  |             |             |                      |           |
| OU                                                  | 42          | 19587       | 2.3                  | (1.4-3.8) |
| Home                                                | 38          | 16589       | 2.1                  | (1.4-3.4) |
| FMU                                                 | 19          | 11210       | 1.7                  | (0.9-3.2) |
| AMU                                                 | 21          | 16569       | 1.6                  | (0.7-3.7) |
| Total                                               | 120         | 63955       | 2.2                  | (1.4-3.5) |
| <b>Neonatal encephalopathy (clinical diagnosis)</b> |             |             |                      |           |
| OU                                                  | 34          | 19587       | 1.9                  | (1.1-3.3) |
| Home                                                | 34          | 16589       | 1.8                  | (1.2-2.9) |
| FMU                                                 | 17          | 11210       | 1.5                  | (0.8-3.0) |
| AMU                                                 | 17          | 16569       | 1.4                  | (0.6-3.6) |
| Total                                               | 102         | 63955       | 1.9                  | (1.2-3.0) |
| <b>Neonatal encephalopathy (signs)</b>              |             |             |                      |           |
| OU                                                  | 8           | 19706       | 0.4                  | (0.2-0.9) |
| Home                                                | 4           | 16840       | 0.3                  | (0.1-1.6) |
| FMU                                                 | 2           | 11282       | 0.2                  | (0.0-1.1) |
| AMU                                                 | 4           | 16710       | 0.2                  | (0.1-0.9) |
| Total                                               | 18          | 64538       | 0.3                  | (0.2-0.7) |
| <b>Meconium aspiration syndrome</b>                 |             |             |                      |           |
| OU                                                  | 28          | 19587       | 1.5                  | (0.8-2.7) |
| Home                                                | 21          | 16589       | 1.3                  | (0.6-2.7) |
| FMU                                                 | 12          | 11210       | 0.9                  | (0.4-2.0) |
| AMU                                                 | 25          | 16569       | 1.3                  | (0.7-2.7) |
| Total                                               | 86          | 63955       | 1.4                  | (0.9-2.4) |
| <b>Brachial plexus injury</b>                       |             |             |                      |           |
| OU                                                  | 8           | 19587       | 0.4                  | (0.2-1.2) |
| Home                                                | 6           | 16589       | 0.3                  | (0.1-1.0) |
| FMU                                                 | 2           | 11210       | 0.1                  | (0.0-0.9) |
| AMU                                                 | 8           | 16569       | 0.4                  | (0.2-1.0) |
| Total                                               | 24          | 63955       | 0.4                  | (0.2-1.0) |
| <b>Fractured humerus</b>                            |             |             |                      |           |
| OU                                                  | 2           | 19587       | 0.1                  | (0.0-0.5) |
| Home                                                | 1           | 16589       | 0.0                  | (0.0-0.7) |
| FMU                                                 | 0           | 11210       | -                    | (-)       |
| AMU                                                 | 0           | 16569       | -                    | (-)       |
| Total                                               | 3           | 63955       | 0.1                  | (0.0-0.4) |
| <b>Fractured clavicle</b>                           |             |             |                      |           |
| OU                                                  | 2           | 19587       | 0.1                  | (0.0-0.6) |
| Home                                                | 2           | 16589       | 0.1                  | (0.0-0.9) |
| FMU                                                 | 2           | 11210       | 0.2                  | (0.0-2.0) |
| AMU                                                 | 2           | 16569       | 0.1                  | (0.0-0.4) |
| Total                                               | 8           | 63955       | 0.1                  | (0.0-0.5) |

\* Weighted to reflect each unit's duration of participation, the sampling of obstetric units and to take the clustered nature of the data into account.

**Table 8.4 (continued): Perinatal outcomes for babies of all 'low risk' women by planned place of birth**

|                                                      | Events<br>n | Births<br>n | Incidence*<br>n/1000<br>(99% CI) | Unadjusted*<br>OR<br>(99% CI) | Unadjusted* <sup>†</sup><br>OR<br>(99% CI) | Adjusted* <sup>‡</sup><br>OR<br>(99% CI) |
|------------------------------------------------------|-------------|-------------|----------------------------------|-------------------------------|--------------------------------------------|------------------------------------------|
| <b>Fractured skull</b>                               |             |             |                                  |                               |                                            |                                          |
| OU                                                   | 0           | 19587       | -                                | (-)                           |                                            |                                          |
| Home                                                 | 0           | 16589       | -                                | (-)                           |                                            |                                          |
| FMU                                                  | 2           | 11210       | 0.2                              | (0.0-1.4)                     |                                            |                                          |
| AMU                                                  | 0           | 16569       | -                                | (-)                           |                                            |                                          |
| Total                                                | 2           | 63955       | 0.0                              | (0.0-0.1)                     |                                            |                                          |
| <b>Cephalhaematoma</b>                               |             |             |                                  |                               |                                            |                                          |
| OU                                                   | 22          | 19587       | 1.1                              | (0.7-1.8)                     |                                            |                                          |
| Home                                                 | 16          | 16589       | 0.9                              | (0.5-1.9)                     |                                            |                                          |
| FMU                                                  | 11          | 11210       | 1.2                              | (0.5-3.0)                     |                                            |                                          |
| AMU                                                  | 15          | 16569       | 0.7                              | (0.3-1.8)                     |                                            |                                          |
| Total                                                | 64          | 63955       | 1.0                              | (0.7-1.6)                     |                                            |                                          |
| <b>Cerebral haemorrhage</b>                          |             |             |                                  |                               |                                            |                                          |
| OU                                                   | 1           | 19587       | 0.1                              | (0.0-0.7)                     |                                            |                                          |
| Home                                                 | 4           | 16589       | 0.2                              | (0.1-0.8)                     |                                            |                                          |
| FMU                                                  | 4           | 11210       | 0.3                              | (0.1-1.3)                     |                                            |                                          |
| AMU                                                  | 3           | 16569       | 0.1                              | (0.0-0.6)                     |                                            |                                          |
| Total                                                | 12          | 63955       | 0.1                              | (0.0-0.4)                     |                                            |                                          |
| <b>Sepsis (early onset and culture positive)</b>     |             |             |                                  |                               |                                            |                                          |
| OU                                                   | 8           | 19584       | 0.4                              | (0.2-0.9)                     |                                            |                                          |
| Home                                                 | 6           | 16586       | 0.3                              | (0.1-0.8)                     |                                            |                                          |
| FMU                                                  | 0           | 11206       | -                                | (-)                           |                                            |                                          |
| AMU                                                  | 5           | 16565       | 0.3                              | (0.1-0.8)                     |                                            |                                          |
| Total                                                | 19          | 63941       | 0.4                              | (0.2-0.7)                     |                                            |                                          |
| <b>Kernicterus (severe bilirubin encephalopathy)</b> |             |             |                                  |                               |                                            |                                          |
| OU                                                   | 0           | 19587       | -                                | (-)                           |                                            |                                          |
| Home                                                 | 0           | 16589       | -                                | (-)                           |                                            |                                          |
| FMU                                                  | 0           | 11210       | -                                | (-)                           |                                            |                                          |
| AMU                                                  | 0           | 16569       | -                                | (-)                           |                                            |                                          |
| Total                                                | 0           | 63955       | -                                | (-)                           |                                            |                                          |
| <b>Seizures</b>                                      |             |             |                                  |                               |                                            |                                          |
| OU                                                   | 19          | 19587       | 1.0                              | (0.5-1.8)                     |                                            |                                          |
| Home                                                 | 25          | 16589       | 1.3                              | (0.7-2.3)                     |                                            |                                          |
| FMU                                                  | 18          | 11210       | 1.5                              | (0.7-3.0)                     |                                            |                                          |
| AMU                                                  | 17          | 16569       | 1.5                              | (0.6-3.7)                     |                                            |                                          |
| Total                                                | 79          | 63955       | 1.1                              | (0.6-1.7)                     |                                            |                                          |
| <b>Neonatal unit admission</b>                       |             |             |                                  |                               |                                            |                                          |
|                                                      |             |             |                                  | n=64175                       | n=62330                                    | n=62330                                  |
| OU                                                   | 543         | 19642       | 28.3                             | (21.7-36.9)                   | 1                                          | -                                        |
| Home                                                 | 284         | 16696       | 17.3                             | (14.3-20.8)                   | 0.60                                       | (0.43-0.84)                              |
| FMU                                                  | 194         | 11257       | 16.7                             | (12.3-22.6)                   | 0.58                                       | (0.39-0.88)                              |
| AMU                                                  | 307         | 16580       | 19.8                             | (14.8-26.4)                   | 0.69                                       | (0.46-1.04)                              |
| Total                                                | 1328        | 64175       | 26.6                             | (21.1-33.6)                   |                                            |                                          |
| <b>Apgar &lt;7 at 5 minutes</b>                      |             |             |                                  |                               |                                            |                                          |
|                                                      |             |             |                                  | n=64365                       | n=62478                                    | n=62478                                  |
| OU                                                   | 177         | 19624       | 9.8                              | (7.9-12.0)                    | 1                                          | -                                        |
| Home                                                 | 139         | 16803       | 8.4                              | (6.7-10.7)                    | 0.86                                       | (0.63-1.19)                              |
| FMU                                                  | 92          | 11264       | 7.5                              | (5.4-10.4)                    | 0.76                                       | (0.52-1.13)                              |
| AMU                                                  | 122         | 16674       | 8.8                              | (5.7-13.5)                    | 0.90                                       | (0.56-1.45)                              |
| Total                                                | 530         | 64365       | 9.5                              | (8.0-11.4)                    |                                            |                                          |
| <b>Not breastfed</b>                                 |             |             |                                  |                               |                                            |                                          |
|                                                      |             |             | n/100 <sup>1</sup>               | (99% CI) <sup>1</sup>         | n=63946                                    | n=62088                                  |
| OU                                                   | 5251        | 19607       | 25.6                             | (20.6-31.3)                   | 1                                          | -                                        |
| Home                                                 | 1934        | 16584       | 11.5                             | (10.0-13.3)                   | 0.38                                       | (0.27-0.52)                              |
| FMU                                                  | 2133        | 11191       | 19.1                             | (14.6-24.6)                   | 0.69                                       | (0.45-1.06)                              |
| AMU                                                  | 3373        | 16564       | 18.8                             | (12.2-27.7)                   | 0.67                                       | (0.38-1.20)                              |
| Total                                                | 12691       | 63946       | 24.1                             | (19.9-28.9)                   |                                            |                                          |

\* Weighted to reflect each unit's duration of participation, the sampling of obstetric units and to take the clustered nature of the data into account.

<sup>†</sup> Restricted to women included in the adjusted analysis.

<sup>‡</sup> Adjusted for maternal age, ethnic group, understanding of English, marital/partner status, body mass index, Index of Multiple Deprivation score quintile, previous pregnancies  $\geq 24$  completed weeks, and gestation (completed weeks).

### Secondary perinatal outcomes for 'low risk' women by planned place of birth and parity

The number of events and weighted incidence of each secondary perinatal outcome for 'low risk' women is shown by planned place of birth and parity in table 8.5. Odds ratios were calculated for the three more commonly occurring perinatal outcomes: neonatal unit admission, Apgar <7 at 5 minutes and not breastfed.

**Table 8.5: Perinatal outcomes for 'low risk' women by planned place of birth and parity**

|                                                    | Events<br>n | Births<br>n | Incidence*<br>n/1000 | (99% CI)  |
|----------------------------------------------------|-------------|-------------|----------------------|-----------|
| <b>Stillbirth</b>                                  |             |             |                      |           |
| Nulliparous women                                  |             |             |                      |           |
| OU                                                 | 1           | 10626       | 0.1                  | (0.0-1.5) |
| Home                                               | 4           | 4568        | 0.9                  | (0.2-3.3) |
| FMU                                                | 1           | 5187        | 0.3                  | (0.0-3.5) |
| AMU                                                | 1           | 8349        | 0.1                  | (0.0-1.6) |
| Total                                              | 7           | 28730       | 0.1                  | (0.0-0.9) |
| Multiparous women                                  |             |             |                      |           |
| OU                                                 | 2           | 9049        | 0.2                  | (0.0-1.2) |
| Home                                               | 2           | 12255       | 0.1                  | (0.0-0.9) |
| FMU                                                | 3           | 6078        | 0.5                  | (0.1-2.2) |
| AMU                                                | 0           | 8322        | -                    | (-)       |
| Total                                              | 7           | 35704       | 0.2                  | (0.0-0.9) |
| <b>Early neonatal death (within 7 days)</b>        |             |             |                      |           |
| Nulliparous women                                  |             |             |                      |           |
| OU                                                 | 4           | 10593       | 0.4                  | (0.1-1.3) |
| Home                                               | 2           | 4544        | 0.4                  | (0.1-2.4) |
| FMU                                                | 3           | 5180        | 0.5                  | (0.1-1.7) |
| AMU                                                | 2           | 8304        | 0.1                  | (0.0-1.7) |
| Total                                              | 11          | 28621       | 0.4                  | (0.1-1.1) |
| Multiparous women                                  |             |             |                      |           |
| OU                                                 | 1           | 9013        | 0.1                  | (0.0-1.8) |
| Home                                               | 3           | 12199       | 0.3                  | (0.1-1.3) |
| FMU                                                | 2           | 6066        | 0.3                  | (0.1-2.2) |
| AMU                                                | 1           | 8293        | 0.1                  | (0.0-1.4) |
| Total                                              | 7           | 35571       | 0.2                  | (0.0-1.0) |
| <b>Neonatal encephalopathy (clinical or signs)</b> |             |             |                      |           |
| Nulliparous women                                  |             |             |                      |           |
| OU                                                 | 27          | 10560       | 2.8                  | (1.5-5.2) |
| Home                                               | 22          | 4500        | 4.8                  | (2.7-8.6) |
| FMU                                                | 13          | 5163        | 2.5                  | (1.1-5.6) |
| AMU                                                | 17          | 8282        | 2.9                  | (1.2-6.9) |
| Total                                              | 79          | 28505       | 2.8                  | (1.6-4.8) |
| Multiparous women                                  |             |             |                      |           |
| OU                                                 | 15          | 8997        | 1.8                  | (0.8-3.7) |
| Home                                               | 16          | 12074       | 1.2                  | (0.6-2.2) |
| FMU                                                | 6           | 6031        | 1.1                  | (0.4-2.9) |
| AMU                                                | 4           | 8252        | 0.4                  | (0.1-1.4) |
| Total                                              | 41          | 35354       | 1.6                  | (0.8-3.1) |

\* Weighted to reflect each unit's duration of participation and probability of being sampled; confidence intervals take account of the clustered nature of the data.

**Table 8.5 (continued): Perinatal outcomes for 'low risk' women by planned place of birth and parity**

|                                                     | Events<br>n | Births<br>n | Incidence*<br>n/1000 (99% CI) |           |
|-----------------------------------------------------|-------------|-------------|-------------------------------|-----------|
| <b>Neonatal encephalopathy (clinical diagnosis)</b> |             |             |                               |           |
| Nulliparous women                                   |             |             |                               |           |
| OU                                                  | 20          | 10560       | 2.2                           | (1.1-4.2) |
| Home                                                | 19          | 4500        | 3.8                           | (2.1-6.9) |
| FMU                                                 | 12          | 5163        | 2.3                           | (0.9-5.5) |
| AMU                                                 | 14          | 8282        | 2.5                           | (0.9-6.9) |
| Total                                               | 65          | 28505       | 2.2                           | (1.3-3.9) |
| Multiparous women                                   |             |             |                               |           |
| OU                                                  | 14          | 8997        | 1.7                           | (0.8-3.6) |
| Home                                                | 15          | 12074       | 1.1                           | (0.6-2.2) |
| FMU                                                 | 5           | 6031        | 0.9                           | (0.3-2.8) |
| AMU                                                 | 3           | 8252        | 0.3                           | (0.1-1.4) |
| Total                                               | 37          | 35354       | 1.5                           | (0.7-3.0) |
| <b>Neonatal encephalopathy (signs)</b>              |             |             |                               |           |
| Nulliparous women                                   |             |             |                               |           |
| OU                                                  | 7           | 10626       | 0.6                           | (0.2-1.6) |
| Home                                                | 3           | 4568        | 1.0                           | (0.1-6.3) |
| FMU                                                 | 1           | 5187        | 0.2                           | (0.0-2.5) |
| AMU                                                 | 3           | 8350        | 0.3                           | (0.1-1.5) |
| Total                                               | 14          | 28731       | 0.6                           | (0.2-1.4) |
| Multiparous women                                   |             |             |                               |           |
| OU                                                  | 1           | 9049        | 0.1                           | (0.0-1.0) |
| Home                                                | 1           | 12256       | 0.0                           | (0.0-0.6) |
| FMU                                                 | 1           | 6078        | 0.2                           | (0.0-2.1) |
| AMU                                                 | 1           | 8323        | 0.1                           | (0.0-1.1) |
| Total                                               | 4           | 35706       | 0.1                           | (0.0-0.6) |
| <b>Meconium aspiration syndrome</b>                 |             |             |                               |           |
| Nulliparous women                                   |             |             |                               |           |
| OU                                                  | 16          | 10560       | 1.6                           | (0.7-3.5) |
| Home                                                | 13          | 4500        | 3.3                           | (1.3-8.6) |
| FMU                                                 | 6           | 5163        | 1.1                           | (0.3-3.9) |
| AMU                                                 | 14          | 8282        | 1.1                           | (0.5-2.7) |
| Total                                               | 49          | 28505       | 1.6                           | (0.8-3.1) |
| Multiparous women                                   |             |             |                               |           |
| OU                                                  | 12          | 8997        | 1.4                           | (0.6-3.2) |
| Home                                                | 8           | 12074       | 0.6                           | (0.2-1.4) |
| FMU                                                 | 6           | 6031        | 0.7                           | (0.2-2.1) |
| AMU                                                 | 11          | 8252        | 1.5                           | (0.6-4.2) |
| Total                                               | 37          | 35354       | 1.3                           | (0.6-2.7) |
| <b>Brachial plexus injury</b>                       |             |             |                               |           |
| Nulliparous women                                   |             |             |                               |           |
| OU                                                  | 8           | 10560       | 0.8                           | (0.3-2.3) |
| Home                                                | 3           | 4500        | 0.6                           | (0.1-3.8) |
| FMU                                                 | 1           | 5163        | 0.2                           | (0.0-1.9) |
| AMU                                                 | 5           | 8282        | 0.5                           | (0.1-1.8) |
| Total                                               | 17          | 28505       | 0.8                           | (0.3-2.0) |
| Multiparous women                                   |             |             |                               |           |
| OU                                                  | 0           | 8997        | -                             | (-)       |
| Home                                                | 3           | 12074       | 0.2                           | (0.0-0.9) |
| FMU                                                 | 1           | 6031        | 0.1                           | (0.0-1.9) |
| AMU                                                 | 3           | 8252        | 0.3                           | (0.1-1.4) |
| Total                                               | 7           | 35354       | 0.0                           | (0.0-0.2) |

\* Weighted to reflect each unit's duration of participation and probability of being sampled; confidence intervals take account of the clustered nature of the data.



**Table 8.5 (continued): Perinatal outcomes for 'low risk' women by planned place of birth and parity**

|                           | Events<br>n | Births<br>n | Incidence*<br>n/1000 (99% CI) |           |
|---------------------------|-------------|-------------|-------------------------------|-----------|
| <b>Fractured humerus</b>  |             |             |                               |           |
| Nulliparous women         |             |             |                               |           |
| OU                        | 0           | 10560       | -                             | (-)       |
| Home                      | 0           | 4500        | -                             | (-)       |
| FMU                       | 0           | 5163        | -                             | (-)       |
| AMU                       | 0           | 8282        | -                             | (-)       |
| Total                     | 0           | 28505       | -                             | (-)       |
| Multiparous women         |             |             |                               |           |
| OU                        | 2           | 8997        | 0.2                           | (0.0-1.1) |
| Home                      | 1           | 12074       | 0.1                           | (0.0-0.9) |
| FMU                       | 0           | 6031        | -                             | (-)       |
| AMU                       | 0           | 8252        | -                             | (-)       |
| Total                     | 3           | 35354       | 0.2                           | (0.0-0.9) |
| <b>Fractured clavicle</b> |             |             |                               |           |
| Nulliparous women         |             |             |                               |           |
| OU                        | 1           | 10560       | 0.1                           | (0.0-1.5) |
| Home                      | 1           | 4500        | 0.2                           | (0.0-3.1) |
| FMU                       | 1           | 5163        | 0.1                           | (0.0-1.4) |
| AMU                       | 1           | 8282        | 0.1                           | (0.0-0.8) |
| Total                     | 4           | 28505       | 0.1                           | (0.0-1.0) |
| Multiparous women         |             |             |                               |           |
| OU                        | 1           | 8997        | 0.1                           | (0.0-1.2) |
| Home                      | 1           | 12074       | 0.1                           | (0.0-1.5) |
| FMU                       | 1           | 6031        | 0.4                           | (0.0-4.6) |
| AMU                       | 1           | 8252        | 0.1                           | (0.0-0.9) |
| Total                     | 4           | 35354       | 0.1                           | (0.0-0.7) |
| <b>Fractured skull</b>    |             |             |                               |           |
| Nulliparous women         |             |             |                               |           |
| OU                        | 0           | 10560       | -                             | (-)       |
| Home                      | 0           | 4500        | -                             | (-)       |
| FMU                       | 1           | 5163        | 0.3                           | (0.4-2)   |
| AMU                       | 0           | 8282        | -                             | (-)       |
| Total                     | 1           | 28505       | 0.0                           | (0.0-1)   |
| Multiparous women         |             |             |                               |           |
| OU                        | 0           | 8997        | -                             | (-)       |
| Home                      | 0           | 12074       | -                             | (-)       |
| FMU                       | 1           | 6031        | 0.1                           | (0.1-7)   |
| AMU                       | 0           | 8252        | -                             | (-)       |
| Total                     | 1           | 35354       | 0.0                           | (0.0-1)   |
| <b>Cephalhaematoma</b>    |             |             |                               |           |
| Nulliparous women         |             |             |                               |           |
| OU                        | 20          | 10560       | 1.8                           | (1.1-3.0) |
| Home                      | 9           | 4500        | 2.0                           | (0.7-5.4) |
| FMU                       | 7           | 5163        | 1.5                           | (0.4-4.9) |
| AMU                       | 15          | 8282        | 1.4                           | (0.6-3.5) |
| Total                     | 51          | 28505       | 1.8                           | (1.2-2.7) |
| Multiparous women         |             |             |                               |           |
| OU                        | 2           | 8997        | 0.2                           | (0.0-1.0) |
| Home                      | 7           | 12074       | 0.5                           | (0.2-1.4) |
| FMU                       | 4           | 6031        | 1.1                           | (0.3-4.0) |
| AMU                       | 0           | 8252        | -                             | (-)       |
| Total                     | 13          | 35354       | 0.2                           | (0.1-0.7) |

\* Weighted to reflect each unit's duration of participation and probability of being sampled; confidence intervals take account of the clustered nature of the data.

**Table 8.5 (continued): Perinatal outcomes for 'low risk' women by planned place of birth and parity**

|                                                      | Events<br>n | Births<br>n | Incidence*<br>n/1000 (99% CI) |           |
|------------------------------------------------------|-------------|-------------|-------------------------------|-----------|
| <b>Cerebral haemorrhage</b>                          |             |             |                               |           |
| Nulliparous women                                    |             |             |                               |           |
| OU                                                   | 1           | 10560       | 0.1                           | (0.0-1.3) |
| Home                                                 | 1           | 4500        | 0.2                           | (0.0-2.0) |
| FMU                                                  | 2           | 5163        | 0.2                           | (0-1.4)   |
| AMU                                                  | 2           | 8282        | 0.1                           | (0-0.9)   |
| Total                                                | 6           | 28505       | 0.1                           | (0-0.9)   |
| Multiparous women                                    |             |             |                               |           |
| OU                                                   | 0           | 8997        | -                             | (-)       |
| Home                                                 | 3           | 12074       | 0.2                           | (0.1-1.1) |
| FMU                                                  | 2           | 6031        | 0.3                           | (0.0-3.6) |
| AMU                                                  | 1           | 8252        | 0.1                           | (0.0-1.7) |
| Total                                                | 6           | 35354       | 0.0                           | (0.0-0.2) |
| <b>Sepsis (early onset and culture positive)</b>     |             |             |                               |           |
| Nulliparous women                                    |             |             |                               |           |
| OU                                                   | 6           | 10557       | 0.5                           | (0.2-1.4) |
| Home                                                 | 4           | 4499        | 0.6                           | (0.1-2.6) |
| FMU                                                  | 0           | 5160        | -                             | (-)       |
| AMU                                                  | 5           | 8279        | 0.5                           | (0.2-1.6) |
| Total                                                | 15          | 28495       | 0.5                           | (0.2-1.2) |
| Multiparous women                                    |             |             |                               |           |
| OU                                                   | 2           | 8997        | 0.3                           | (0.0-1.5) |
| Home                                                 | 2           | 12072       | 0.1                           | (0.0-0.9) |
| FMU                                                  | 0           | 6030        | -                             | (-)       |
| AMU                                                  | 0           | 8251        | -                             | (-)       |
| Total                                                | 4           | 35350       | 0.2                           | (0.0-1.2) |
| <b>Kernicterus (severe bilirubin encephalopathy)</b> |             |             |                               |           |
| Nulliparous women                                    |             |             |                               |           |
| OU                                                   | 0           | 10560       | -                             | (-)       |
| Home                                                 | 0           | 4500        | -                             | (-)       |
| FMU                                                  | 0           | 5163        | -                             | (-)       |
| AMU                                                  | 0           | 8282        | -                             | (-)       |
| Total                                                | 0           | 28505       | -                             | (-)       |
| Multiparous women                                    |             |             |                               |           |
| OU                                                   | 0           | 8997        | -                             | (-)       |
| Home                                                 | 0           | 12074       | -                             | (-)       |
| FMU                                                  | 0           | 6031        | -                             | (-)       |
| AMU                                                  | 0           | 8252        | -                             | (-)       |
| Total                                                | 0           | 35354       | -                             | (-)       |
| <b>Seizures</b>                                      |             |             |                               |           |
| Nulliparous women                                    |             |             |                               |           |
| OU                                                   | 9           | 10560       | 0.8                           | (0.4-1.8) |
| Home                                                 | 15          | 4500        | 2.7                           | (1.4-5.3) |
| FMU                                                  | 13          | 5163        | 2.4                           | (1.0-5.6) |
| AMU                                                  | 10          | 8282        | 2.1                           | (0.7-6.9) |
| Total                                                | 47          | 28505       | 1.0                           | (0.5-1.9) |
| Multiparous women                                    |             |             |                               |           |
| OU                                                   | 10          | 8997        | 1.2                           | (0.5-2.9) |
| Home                                                 | 10          | 12074       | 0.7                           | (0.3-1.8) |
| FMU                                                  | 5           | 6031        | 0.7                           | (0.2-2.5) |
| AMU                                                  | 7           | 8252        | 0.8                           | (0.2-2.6) |
| Total                                                | 32          | 35354       | 1.1                           | (0.5-2.4) |

\* Weighted to reflect each unit's duration of participation and probability of being sampled; confidence intervals take account of the clustered nature of the data.

**Table 8.5 (continued): Perinatal outcomes for 'low risk' women by planned place of birth and parity**

|                                 | Events<br>n | Births<br>n | Incidence*<br>n/1000<br>(99% CI) | Unadjusted <sup>*,†</sup><br>OR<br>(99% CI) |             | Adjusted <sup>*,‡</sup><br>OR<br>(99% CI) |             |
|---------------------------------|-------------|-------------|----------------------------------|---------------------------------------------|-------------|-------------------------------------------|-------------|
| <b>Neonatal unit admission</b>  |             |             |                                  | n=61848                                     |             | n=61848                                   |             |
| Nulliparous women               |             |             |                                  |                                             |             |                                           |             |
| OU                              | 372         | 10597       | 36.1<br>(27.0-48.0)              |                                             |             |                                           |             |
| Home                            | 127         | 4535        | 28.5<br>(22.2-36.5)              | 0.81                                        | (0.54-1.20) | 0.79                                      | (0.54-1.17) |
| FMU                             | 120         | 5181        | 21.6<br>(15.2-30.7)              | 0.59                                        | (0.37-0.95) | 0.59                                      | (0.37-0.94) |
| AMU                             | 198         | 8281        | 26.0<br>(19.3-35.0)              | 0.72                                        | (0.46-1.12) | 0.76                                      | (0.49-1.17) |
| Total                           | 817         | 28594       | 34.5<br>(26.7-44.6)              |                                             |             |                                           |             |
| Multiparous women               |             |             |                                  |                                             |             |                                           |             |
| OU                              | 171         | 9015        | 19.2<br>(14.5-25.3)              |                                             |             |                                           |             |
| Home                            | 157         | 12145       | 13.1<br>(10.3-16.6)              | 0.68                                        | (0.47-0.99) | 0.67                                      | (0.46-0.98) |
| FMU                             | 73          | 6060        | 12.2<br>(8.1-18.5)               | 0.64                                        | (0.38-1.06) | 0.64                                      | (0.38-1.06) |
| AMU                             | 109         | 8262        | 13.6<br>(9.4-19.5)               | 0.70                                        | (0.45-1.10) | 0.74                                      | (0.48-1.15) |
| Total                           | 510         | 35482       | 18.0<br>(14.1-22.8)              |                                             |             |                                           |             |
| <b>Apgar &lt;7 at 5 minutes</b> |             |             |                                  | n=61900                                     |             | n=61900                                   |             |
| Nulliparous women               |             |             |                                  |                                             |             |                                           |             |
| OU                              | 101         | 10578       | 10.1<br>(7.8-13.0)               |                                             |             |                                           |             |
| Home                            | 65          | 4552        | 14.3<br>(10.0-20.4)              | 1.45                                        | (0.92-2.29) | 1.43                                      | (0.90-2.28) |
| FMU                             | 56          | 5180        | 9.3<br>(6.6-13.2)                | 0.98                                        | (0.63-1.52) | 1.04                                      | (0.67-1.62) |
| AMU                             | 83          | 8330        | 11.9<br>(7.5-18.8)               | 1.26                                        | (0.73-2.16) | 1.29                                      | (0.75-2.22) |
| Total                           | 305         | 28640       | 10.3<br>(8.3-12.9)               |                                             |             |                                           |             |
| Multiparous women               |             |             |                                  |                                             |             |                                           |             |
| OU                              | 76          | 9017        | 9.4<br>(6.8-13.0)                |                                             |             |                                           |             |
| Home                            | 74          | 12235       | 6.3<br>(4.5-8.7)                 | 0.69                                        | (0.44-1.09) | 0.70                                      | (0.43-1.12) |
| FMU                             | 35          | 6067        | 5.6<br>(3.1-10.0)                | 0.61                                        | (0.31-1.18) | 0.63                                      | (0.32-1.25) |
| AMU                             | 39          | 8307        | 5.7<br>(3.3-9.9)                 | 0.60                                        | (0.31-1.16) | 0.61                                      | (0.32-1.18) |
| Total                           | 224         | 35626       | 8.7<br>(6.5-11.6)                |                                             |             |                                           |             |
| <b>Not breastfed</b>            |             |             |                                  | n=61566                                     |             | n=61566                                   |             |
| Nulliparous women               |             |             |                                  |                                             |             |                                           |             |
| OU                              | 2530        | 10577       | 22.7<br>(17.8-28.3)              |                                             |             |                                           |             |
| Home                            | 272         | 4510        | 6.0<br>(4.8-7.5)                 | 0.22                                        | (0.15-0.32) | 0.28                                      | (0.21-0.39) |
| FMU                             | 830         | 5148        | 16.0<br>(11.9-21.1)              | 0.65                                        | (0.41-1.02) | 0.61                                      | (0.43-0.86) |
| AMU                             | 1470        | 8269        | 16.3<br>(10.1-25.2)              | 0.67                                        | (0.36-1.25) | 0.66                                      | (0.41-1.05) |
| Total                           | 5102        | 28504       | 21.5<br>(17.4-26.4)              |                                             |             |                                           |             |
| Multiparous women               |             |             |                                  |                                             |             |                                           |             |
| OU                              | 2707        | 8999        | 29.0<br>(23.7-34.9)              |                                             |             |                                           |             |
| Home                            | 1660        | 12058       | 13.6<br>(11.9-15.4)              | 0.38                                        | (0.28-0.52) | 0.37                                      | (0.29-0.48) |
| FMU                             | 1300        | 6026        | 21.8<br>(16.7-27.8)              | 0.69                                        | (0.45-1.05) | 0.66                                      | (0.48-0.91) |
| AMU                             | 1896        | 8258        | 21.4<br>(14.5-30.5)              | 0.68                                        | (0.39-1.18) | 0.66                                      | (0.43-1.02) |
| Total                           | 7563        | 35341       | 27.0<br>(22.7-31.9)              |                                             |             |                                           |             |

\* Weighted to reflect each unit's duration of participation and probability of being sampled; confidence intervals take account of the clustered nature of the data.

† Restricted to women included in the adjusted analysis (who were not missing any potential confounder data).

‡ Adjusted for maternal age, ethnic group, understanding of English, marital/partner status, body mass index, Index of Multiple Deprivation score quintile, previous pregnancies  $\geq 24$  weeks, and gestation (completed weeks).

## Secondary maternal outcomes for 'low risk' women by planned place of birth and parity

The number of events and weighted incidence of each secondary maternal outcome for 'low risk' women is shown by planned place of birth and parity in table 8.6. Unadjusted and adjusted odds ratios were also calculated by parity, using the obstetric unit group as the reference for all comparisons.

**Table 8.6: Maternal outcomes for 'low risk' women by planned place of birth and parity**

|                                 | Events<br>n | Births<br>n | Incidence*<br>% | (99% CI)    | Unadjusted <sup>*,†</sup><br>OR | (99% CI)    | Adjusted <sup>*,‡</sup><br>OR | (99% CI)    |
|---------------------------------|-------------|-------------|-----------------|-------------|---------------------------------|-------------|-------------------------------|-------------|
| <b>Spontaneous vertex birth</b> |             |             |                 |             | n=62000                         |             | n=62000                       |             |
| Nulliparous women               |             |             |                 |             |                                 |             |                               |             |
| OU                              | 6589        | 10617       | 61.3            | (57.8-64.7) |                                 |             |                               |             |
| Home                            | 3577        | 4565        | 78.6            | (76.3-80.8) | 2.28                            | (1.87-2.77) | 2.77                          | (2.25-3.41) |
| FMU                             | 4201        | 5186        | 82.3            | (79.1-85.0) | 2.92                            | (2.27-3.75) | 2.97                          | (2.32-3.79) |
| AMU                             | 6357        | 8336        | 75.8            | (72.5-78.9) | 1.97                            | (1.57-2.47) | 1.99                          | (1.57-2.52) |
| Total                           | 20724       | 28704       | 63.7            | (60.4-66.8) |                                 |             |                               |             |
| Multiparous women               |             |             |                 |             |                                 |             |                               |             |
| OU                              | 8030        | 9041        | 88.7            | (86.6-90.4) |                                 |             |                               |             |
| Home                            | 11998       | 12244       | 98.0            | (97.7-98.4) | 6.36                            | (4.87-8.30) | 6.85                          | (5.23-8.96) |
| FMU                             | 5937        | 6078        | 97.8            | (97.1-98.3) | 5.46                            | (3.88-7.69) | 5.65                          | (3.98-8.01) |
| AMU                             | 8025        | 8317        | 96.3            | (95.2-97.2) | 3.33                            | (2.36-4.70) | 3.33                          | (2.35-4.71) |
| Total                           | 33990       | 35680       | 90.4            | (88.6-91.9) |                                 |             |                               |             |
| <b>Vaginal breech birth</b>     |             |             |                 |             | n=62000                         |             | n=62000                       |             |
| Nulliparous women               |             |             |                 |             |                                 |             |                               |             |
| OU                              | 18          | 10617       | 0.2             | (0.1-0.3)   |                                 |             |                               |             |
| Home                            | 13          | 4565        | 0.3             | (0.1-0.5)   | 1.64                            | (0.58-4.66) | 2.15                          | (0.77-6.02) |
| FMU                             | 15          | 5186        | 0.3             | (0.1-0.6)   | 1.72                            | (0.59-4.96) | 1.91                          | (0.67-5.40) |
| AMU                             | 15          | 8336        | 0.2             | (0.1-0.4)   | 1.10                            | (0.39-3.11) | 1.10                          | (0.41-2.98) |
| Total                           | 61          | 28704       | 0.2             | (0.1-0.3)   |                                 |             |                               |             |
| Multiparous women               |             |             |                 |             |                                 |             |                               |             |
| OU                              | 25          | 9041        | 0.3             | (0.2-0.5)   |                                 |             |                               |             |
| Home                            | 50          | 12244       | 0.4             | (0.3-0.6)   | 1.61                            | (0.78-3.31) | 2.02                          | (0.98-4.16) |
| FMU                             | 24          | 6078        | 0.4             | (0.2-0.8)   | 1.74                            | (0.75-4.03) | 2.03                          | (0.90-4.59) |
| AMU                             | 11          | 8317        | 0.2             | (0.1-0.4)   | 0.72                            | (0.26-2.01) | 0.74                          | (0.27-2.05) |
| Total                           | 110         | 35680       | 0.3             | (0.2-0.4)   |                                 |             |                               |             |
| <b>Ventouse delivery</b>        |             |             |                 |             | n=62000                         |             | n=62000                       |             |
| Nulliparous women               |             |             |                 |             |                                 |             |                               |             |
| OU                              | 1204        | 10617       | 11.8            | (9.4-14.7)  |                                 |             |                               |             |
| Home                            | 282         | 4565        | 5.9             | (4.9-7.2)   | 0.49                            | (0.35-0.67) | 0.40                          | (0.29-0.56) |
| FMU                             | 295         | 5186        | 5.3             | (3.9-7.2)   | 0.43                            | (0.29-0.65) | 0.41                          | (0.28-0.60) |
| AMU                             | 654         | 8336        | 8.1             | (6.2-10.6)  | 0.66                            | (0.45-0.97) | 0.63                          | (0.44-0.92) |
| Total                           | 2435        | 28704       | 11.1            | (9.0-13.6)  |                                 |             |                               |             |
| Multiparous women               |             |             |                 |             |                                 |             |                               |             |
| OU                              | 330         | 9041        | 3.7             | (2.8-4.9)   |                                 |             |                               |             |
| Home                            | 60          | 12244       | 0.5             | (0.3-0.7)   | 0.14                            | (0.08-0.22) | 0.12                          | (0.07-0.20) |
| FMU                             | 25          | 6078        | 0.4             | (0.2-0.7)   | 0.10                            | (0.05-0.21) | 0.09                          | (0.04-0.20) |
| AMU                             | 101         | 8317        | 1.3             | (0.9-2.0)   | 0.36                            | (0.22-0.60) | 0.35                          | (0.21-0.58) |
| Total                           | 516         | 35680       | 3.1             | (2.4-4.1)   |                                 |             |                               |             |

\* Weighted to reflect each unit's duration of participation and probability of being sampled; confidence intervals take account of the clustered nature of the data.

† Restricted to women included in the adjusted analysis (who were not missing any potential confounder data).

‡ Adjusted for maternal age, ethnic group, understanding of English, marital/partner status, body mass index, Index of Multiple Deprivation score quintile, previous pregnancies >=24 weeks, and gestation (completed weeks).

**Table 8.6 (continued): Maternal outcomes for 'low risk' women by planned place of birth and parity**

|                                               | Events<br>n | Births<br>n | Incidence*<br>% | (99% CI)    | Unadjusted* <sup>†</sup><br>OR | (99% CI)    | Adjusted* <sup>‡</sup><br>OR | (99% CI)    |
|-----------------------------------------------|-------------|-------------|-----------------|-------------|--------------------------------|-------------|------------------------------|-------------|
| <b>Forceps delivery</b>                       |             |             |                 |             | n=62000                        |             | n=62000                      |             |
| Nulliparous women                             |             |             |                 |             |                                |             |                              |             |
| OU                                            | 1125        | 10617       | 10.7            | (8.6-13.2)  |                                |             |                              |             |
| Home                                          | 318         | 4565        | 6.6             | (5.6-7.8)   | 0.60                           | (0.45-0.81) | 0.53                         | (0.39-0.72) |
| FMU                                           | 318         | 5186        | 5.4             | (4.2-7.1)   | 0.49                           | (0.34-0.70) | 0.48                         | (0.33-0.69) |
| AMU                                           | 673         | 8336        | 8.2             | (6.1-10.9)  | 0.74                           | (0.50-1.10) | 0.74                         | (0.49-1.10) |
| Total                                         | 2434        | 28704       | 10.2            | (8.4-12.4)  |                                |             |                              |             |
| Multiparous women                             |             |             |                 |             |                                |             |                              |             |
| OU                                            | 182         | 9041        | 2.1             | (1.5-2.9)   |                                |             |                              |             |
| Home                                          | 53          | 12244       | 0.4             | (0.3-0.6)   | 0.20                           | (0.12-0.33) | 0.18                         | (0.11-0.31) |
| FMU                                           | 46          | 6078        | 0.7             | (0.5-1.1)   | 0.34                           | (0.20-0.59) | 0.33                         | (0.19-0.56) |
| AMU                                           | 92          | 8317        | 1.1             | (0.7-2.0)   | 0.55                           | (0.29-1.05) | 0.55                         | (0.29-1.04) |
| Total                                         | 373         | 35680       | 1.8             | (1.4-2.5)   |                                |             |                              |             |
| <b>Intrapartum caesarean section</b>          |             |             |                 |             | n=62000                        |             | n=62000                      |             |
| Nulliparous women                             |             |             |                 |             |                                |             |                              |             |
| OU                                            | 1681        | 10617       | 16.0            | (13.9-18.4) |                                |             |                              |             |
| Home                                          | 375         | 4565        | 8.5             | (7.0-10.4)  | 0.49                           | (0.37-0.65) | 0.45                         | (0.34-0.59) |
| FMU                                           | 357         | 5186        | 6.7             | (5.5-8.1)   | 0.37                           | (0.28-0.48) | 0.39                         | (0.30-0.50) |
| AMU                                           | 637         | 8336        | 7.7             | (6.3-9.3)   | 0.45                           | (0.34-0.58) | 0.47                         | (0.35-0.62) |
| Total                                         | 3050        | 28704       | 14.8            | (12.9-16.9) |                                |             |                              |             |
| Multiparous women                             |             |             |                 |             |                                |             |                              |             |
| OU                                            | 474         | 9041        | 5.3             | (4.1-6.9)   |                                |             |                              |             |
| Home                                          | 83          | 12244       | 0.6             | (0.5-0.9)   | 0.11                           | (0.07-0.17) | 0.11                         | (0.07-0.17) |
| FMU                                           | 46          | 6078        | 0.7             | (0.5-1.1)   | 0.13                           | (0.08-0.23) | 0.14                         | (0.08-0.23) |
| AMU                                           | 88          | 8317        | 1.0             | (0.7-1.5)   | 0.18                           | (0.11-0.30) | 0.19                         | (0.11-0.32) |
| Total                                         | 691         | 35680       | 4.4             | (3.4-5.7)   |                                |             |                              |             |
| <b>Third or fourth degree perineal trauma</b> |             |             |                 |             | n=61902                        |             | n=61902                      |             |
| Nulliparous women                             |             |             |                 |             |                                |             |                              |             |
| OU                                            | 480         | 10585       | 4.5             | (3.8-5.3)   |                                |             |                              |             |
| Home                                          | 195         | 4555        | 4.3             | (3.5-5.3)   | 0.93                           | (0.69-1.25) | 0.86                         | (0.62-1.19) |
| FMU                                           | 206         | 5177        | 4.0             | (3.1-5.1)   | 0.89                           | (0.66-1.21) | 0.89                         | (0.64-1.24) |
| AMU                                           | 405         | 8322        | 4.9             | (4.0-6.0)   | 1.08                           | (0.82-1.44) | 1.08                         | (0.81-1.45) |
| Total                                         | 1286        | 28639       | 4.5             | (3.9-5.2)   |                                |             |                              |             |
| Multiparous women                             |             |             |                 |             |                                |             |                              |             |
| OU                                            | 145         | 9025        | 1.6             | (1.2-2.1)   |                                |             |                              |             |
| Home                                          | 123         | 12229       | 1.0             | (0.7-1.3)   | 0.64                           | (0.42-0.96) | 0.63                         | (0.40-0.99) |
| FMU                                           | 52          | 6068        | 0.9             | (0.6-1.4)   | 0.57                           | (0.34-0.95) | 0.56                         | (0.33-0.95) |
| AMU                                           | 129         | 8295        | 1.6             | (1.2-2.1)   | 0.94                           | (0.61-1.44) | 0.93                         | (0.61-1.41) |
| Total                                         | 449         | 35617       | 1.6             | (1.2-2.0)   |                                |             |                              |             |
| <b>Blood transfusion</b>                      |             |             |                 |             | n=61734                        |             | n=61734                      |             |
| Nulliparous women                             |             |             |                 |             |                                |             |                              |             |
| OU                                            | 174         | 10564       | 1.6             | (1.3-2.1)   |                                |             |                              |             |
| Home                                          | 55          | 4540        | 1.3             | (0.9-2.1)   | 0.87                           | (0.52-1.45) | 0.93                         | (0.54-1.58) |
| FMU                                           | 42          | 5173        | 0.8             | (0.5-1.1)   | 0.48                           | (0.31-0.76) | 0.52                         | (0.33-0.82) |
| AMU                                           | 93          | 8262        | 1.3             | (0.9-1.7)   | 0.74                           | (0.49-1.11) | 0.75                         | (0.51-1.10) |
| Total                                         | 364         | 28539       | 1.6             | (1.3-2.0)   |                                |             |                              |             |
| Multiparous women                             |             |             |                 |             |                                |             |                              |             |
| OU                                            | 67          | 8984        | 0.7             | (0.5-1.1)   |                                |             |                              |             |
| Home                                          | 46          | 12131       | 0.4             | (0.3-0.6)   | 0.48                           | (0.28-0.81) | 0.51                         | (0.29-0.89) |
| FMU                                           | 25          | 6040        | 0.3             | (0.2-0.6)   | 0.39                           | (0.19-0.81) | 0.42                         | (0.20-0.87) |
| AMU                                           | 43          | 8250        | 0.6             | (0.4-0.8)   | 0.74                           | (0.44-1.27) | 0.74                         | (0.44-1.26) |
| Total                                         | 181         | 35405       | 0.7             | (0.5-0.9)   |                                |             |                              |             |

\* Weighted to reflect each unit's duration of participation and probability of being sampled; confidence intervals take account of the clustered nature of the data.

† Restricted to women included in the adjusted analysis (who were not missing any potential confounder data).

‡ Adjusted for maternal age, ethnic group, understanding of English, marital/partner status, body mass index, Index of Multiple Deprivation score quintile, previous pregnancies  $\geq 24$  weeks, and gestation (completed weeks).

**Table 8.6 (continued): Maternal outcomes for 'low risk' women by planned place of birth and parity**

|                                            | Events<br>n | Births<br>n | Incidence*<br>% | (99% CI)    | Unadjusted* <sup>†</sup> |              | Adjusted* <sup>‡</sup> |              |
|--------------------------------------------|-------------|-------------|-----------------|-------------|--------------------------|--------------|------------------------|--------------|
|                                            |             |             |                 |             | OR                       | (99% CI)     | OR                     | (99% CI)     |
| <b>Admission to a higher level of care</b> |             |             |                 |             | n=62036                  |              | n=62036                |              |
| Nulliparous women                          |             |             |                 |             |                          |              |                        |              |
| OU                                         | 83          | 10626       | 0.8             | (0.4-1.6)   |                          |              |                        |              |
| Home                                       | 26          | 4568        | 0.6             | (0.3-1.2)   | 0.67                     | (0.27-1.69)  | 0.66                   | (0.26-1.66)  |
| FMU                                        | 15          | 5187        | 0.2             | (0.1-0.5)   | 0.31                     | (0.11-0.86)  | 0.35                   | (0.13-0.96)  |
| AMU                                        | 51          | 8350        | 1.0             | (0.4-2.8)   | 1.23                     | (0.35-4.35)  | 1.24                   | (0.37-4.17)  |
| Total                                      | 175         | 28731       | 0.8             | (0.5-1.4)   |                          |              |                        |              |
| Multiparous women                          |             |             |                 |             |                          |              |                        |              |
| OU                                         | 34          | 9049        | 0.4             | (0.2-0.7)   |                          |              |                        |              |
| Home                                       | 32          | 12256       | 0.3             | (0.2-0.5)   | 0.75                     | (0.32-1.73)  | 0.78                   | (0.32-1.92)  |
| FMU                                        | 9           | 6078        | 0.1             | (0.0-0.3)   | 0.26                     | (0.06-1.05)  | 0.28                   | (0.07-1.22)  |
| AMU                                        | 31          | 8323        | 0.4             | (0.2-0.7)   | 0.95                     | (0.41-2.19)  | 0.95                   | (0.42-2.17)  |
| Total                                      | 106         | 35706       | 0.4             | (0.2-0.6)   |                          |              |                        |              |
| <b>Syntocinon augmentation</b>             |             |             |                 |             | n=61738                  |              | n=61738                |              |
| Nulliparous women                          |             |             |                 |             |                          |              |                        |              |
| OU                                         | 3639        | 10487       | 34.9            | (31.7-38.4) |                          |              |                        |              |
| Home                                       | 804         | 4542        | 17.1            | (15.2-19.2) | 0.39                     | (0.31-0.47)  | 0.35                   | (0.28-0.43)  |
| FMU                                        | 778         | 5158        | 13.9            | (11.8-16.3) | 0.30                     | (0.23-0.38)  | 0.30                   | (0.23-0.38)  |
| AMU                                        | 1507        | 8318        | 18.0            | (15.9-20.3) | 0.41                     | (0.33-0.51)  | 0.42                   | (0.34-0.52)  |
| Total                                      | 6728        | 28505       | 32.3            | (29.4-35.4) |                          |              |                        |              |
| Multiparous women                          |             |             |                 |             |                          |              |                        |              |
| OU                                         | 901         | 8966        | 10.0            | (8.3-12.0)  |                          |              |                        |              |
| Home                                       | 139         | 12236       | 1.1             | (0.8-1.4)   | 0.10                     | (0.07-0.14)  | 0.10                   | (0.07-0.14)  |
| FMU                                        | 96          | 6065        | 1.4             | (0.9-2.1)   | 0.13                     | (0.08-0.21)  | 0.12                   | (0.08-0.20)  |
| AMU                                        | 199         | 8305        | 2.4             | (1.8-3.3)   | 0.22                     | (0.15-0.32)  | 0.23                   | (0.16-0.32)  |
| Total                                      | 1335        | 35572       | 8.3             | (6.9-10.0)  |                          |              |                        |              |
| <b>Immersion in water for pain relief</b>  |             |             |                 |             | n=61673                  |              | n=61673                |              |
| Nulliparous women                          |             |             |                 |             |                          |              |                        |              |
| OU                                         | 1242        | 10613       | 11.4            | (8.1-15.7)  |                          |              |                        |              |
| Home                                       | 2189        | 4455        | 48.8            | (44.3-53.3) | 7.28                     | (4.85-10.92) | 6.21                   | (4.20-9.18)  |
| FMU                                        | 2726        | 5178        | 51.9            | (41.2-62.5) | 8.28                     | (4.68-14.66) | 7.65                   | (4.37-13.39) |
| AMU                                        | 3077        | 8337        | 37.1            | (29.0-45.9) | 4.47                     | (2.66-7.51)  | 4.55                   | (2.75-7.51)  |
| Total                                      | 9234        | 28583       | 15.8            | (12.4-19.9) |                          |              |                        |              |
| Multiparous women                          |             |             |                 |             |                          |              |                        |              |
| OU                                         | 593         | 9037        | 6.3             | (4.3-9.2)   |                          |              |                        |              |
| Home                                       | 3329        | 11973       | 27.5            | (25.0-30.2) | 5.48                     | (3.58-8.39)  | 4.71                   | (3.11-7.14)  |
| FMU                                        | 2520        | 6075        | 40.6            | (30.7-51.2) | 9.82                     | (5.42-17.79) | 8.86                   | (4.92-15.95) |
| AMU                                        | 1975        | 8319        | 23.2            | (17.5-30.1) | 4.35                     | (2.54-7.44)  | 4.47                   | (2.65-7.53)  |
| Total                                      | 8417        | 35404       | 10.7            | (8.3-13.7)  |                          |              |                        |              |
| <b>Epidural or spinal analgesia</b>        |             |             |                 |             | n=61853                  |              | n=61853                |              |
| Nulliparous women                          |             |             |                 |             |                          |              |                        |              |
| OU                                         | 4345        | 10550       | 42.5            | (38.3-46.8) |                          |              |                        |              |
| Home                                       | 1049        | 4545        | 22.7            | (20.3-25.3) | 0.40                     | (0.32-0.50)  | 0.35                   | (0.28-0.44)  |
| FMU                                        | 1021        | 5168        | 18.9            | (16.5-21.6) | 0.32                     | (0.25-0.41)  | 0.31                   | (0.25-0.40)  |
| AMU                                        | 1987        | 8320        | 24.4            | (21.5-27.7) | 0.44                     | (0.35-0.56)  | 0.44                   | (0.35-0.57)  |
| Total                                      | 8402        | 28583       | 39.6            | (35.7-43.7) |                          |              |                        |              |
| Multiparous women                          |             |             |                 |             |                          |              |                        |              |
| OU                                         | 1465        | 8998        | 16.8            | (14.4-19.5) |                          |              |                        |              |
| Home                                       | 369         | 12238       | 2.9             | (2.5-3.5)   | 0.15                     | (0.12-0.20)  | 0.14                   | (0.11-0.18)  |
| FMU                                        | 224         | 6068        | 3.5             | (2.8-4.5)   | 0.18                     | (0.13-0.25)  | 0.17                   | (0.13-0.24)  |
| AMU                                        | 472         | 8305        | 5.9             | (4.8-7.1)   | 0.31                     | (0.23-0.41)  | 0.31                   | (0.24-0.41)  |
| Total                                      | 2530        | 35609       | 14.3            | (12.2-16.6) |                          |              |                        |              |

\* Weighted to reflect each unit's duration of participation and probability of being sampled; confidence intervals take account of the clustered nature of the data.

† Restricted to women included in the adjusted analysis (who were not missing any potential confounder data).

‡ Adjusted for maternal age, ethnic group, understanding of English, marital/partner status, body mass index, Index of Multiple Deprivation score quintile, previous pregnancies  $\geq 24$  weeks, and gestation (completed weeks).



**Table 8.6 (continued): Maternal outcomes for 'low risk' women by planned place of birth and parity**

|                                                         | Events<br>n | Births<br>n | Incidence*<br>% | (99% CI)    | Unadjusted* <sup>†</sup><br>OR | (99% CI)     | Adjusted* <sup>‡</sup><br>OR | (99% CI)     |
|---------------------------------------------------------|-------------|-------------|-----------------|-------------|--------------------------------|--------------|------------------------------|--------------|
| <b>General anaesthesia</b>                              |             |             |                 |             | n=61610                        |              | n=61610                      |              |
| Nulliparous women                                       |             |             |                 |             |                                |              |                              |              |
| OU                                                      | 199         | 10446       | 1.9             | (1.5-2.4)   |                                |              |                              |              |
| Home                                                    | 47          | 4490        | 1.0             | (0.6-1.6)   | 0.55                           | (0.33-0.95)  | 0.56                         | (0.32-0.96)  |
| FMU                                                     | 43          | 5162        | 0.9             | (0.5-1.5)   | 0.46                           | (0.25-0.84)  | 0.48                         | (0.26-0.88)  |
| AMU                                                     | 73          | 8297        | 0.9             | (0.6-1.5)   | 0.49                           | (0.30-0.79)  | 0.52                         | (0.32-0.84)  |
| Total                                                   | 362         | 28395       | 1.7             | (1.4-2.2)   |                                |              |                              |              |
| Multiparous women                                       |             |             |                 |             |                                |              |                              |              |
| OU                                                      | 86          | 8948        | 0.9             | (0.7-1.3)   |                                |              |                              |              |
| Home                                                    | 30          | 12208       | 0.2             | (0.1-0.4)   | 0.25                           | (0.13-0.50)  | 0.26                         | (0.13-0.50)  |
| FMU                                                     | 18          | 6067        | 0.2             | (0.1-0.6)   | 0.26                           | (0.10-0.69)  | 0.27                         | (0.10-0.70)  |
| AMU                                                     | 26          | 8308        | 0.3             | (0.2-0.5)   | 0.33                           | (0.18-0.60)  | 0.35                         | (0.19-0.63)  |
| Total                                                   | 160         | 35531       | 0.8             | (0.6-1.1)   |                                |              |                              |              |
| <b>No active management of the 3<sup>rd</sup> stage</b> |             |             |                 |             | n=61664                        |              | n=61664                      |              |
| Nulliparous women                                       |             |             |                 |             |                                |              |                              |              |
| OU                                                      | 615         | 10610       | 5.9             | (4.5-7.7)   |                                |              |                              |              |
| Home                                                    | 1289        | 4446        | 29.3            | (25.4-33.4) | 6.61                           | (4.66-9.37)  | 6.35                         | (4.48-9.02)  |
| FMU                                                     | 1052        | 5179        | 20.2            | (14.5-27.6) | 4.13                           | (2.50-6.81)  | 4.19                         | (2.56-6.87)  |
| AMU                                                     | 1144        | 8335        | 12.8            | (9.2-17.6)  | 2.32                           | (1.45-3.72)  | 2.32                         | (1.46-3.67)  |
| Total                                                   | 4100        | 28570       | 7.5             | (6.0-9.2)   |                                |              |                              |              |
| Multiparous women                                       |             |             |                 |             |                                |              |                              |              |
| OU                                                      | 572         | 9043        | 6.4             | (4.7-8.7)   |                                |              |                              |              |
| Home                                                    | 3799        | 11967       | 32.0            | (28.2-36.1) | 6.97                           | (4.78-10.18) | 6.91                         | (4.69-10.17) |
| FMU                                                     | 1515        | 6076        | 23.8            | (16.8-32.5) | 4.64                           | (2.68-8.03)  | 4.70                         | (2.72-8.15)  |
| AMU                                                     | 1416        | 8320        | 15.4            | (11.1-20.9) | 2.67                           | (1.62-4.41)  | 2.66                         | (1.62-4.38)  |
| Total                                                   | 7302        | 35406       | 9.6             | (7.7-11.8)  |                                |              |                              |              |
| <b>Episiotomy</b>                                       |             |             |                 |             | n=61868                        |              | n=61868                      |              |
| Nulliparous women                                       |             |             |                 |             |                                |              |                              |              |
| OU                                                      | 3087        | 10606       | 29.3            | (26.6-32.1) |                                |              |                              |              |
| Home                                                    | 756         | 4518        | 16.0            | (14.5-17.6) | 0.47                           | (0.39-0.56)  | 0.41                         | (0.34-0.50)  |
| FMU                                                     | 855         | 5183        | 16.0            | (13.3-19.1) | 0.46                           | (0.36-0.60)  | 0.45                         | (0.35-0.57)  |
| AMU                                                     | 1804        | 8337        | 22.1            | (19.3-25.2) | 0.68                           | (0.55-0.85)  | 0.67                         | (0.53-0.84)  |
| Total                                                   | 6502        | 28644       | 27.9            | (25.5-30.4) |                                |              |                              |              |
| Multiparous women                                       |             |             |                 |             |                                |              |                              |              |
| OU                                                      | 689         | 9042        | 7.5             | (6.4-8.9)   |                                |              |                              |              |
| Home                                                    | 176         | 12137       | 1.5             | (1.2-1.8)   | 0.19                           | (0.14-0.26)  | 0.18                         | (0.14-0.24)  |
| FMU                                                     | 137         | 6076        | 2.3             | (1.8-3.0)   | 0.29                           | (0.21-0.41)  | 0.28                         | (0.20-0.39)  |
| AMU                                                     | 287         | 8315        | 3.7             | (3.0-4.6)   | 0.48                           | (0.36-0.65)  | 0.47                         | (0.35-0.64)  |
| Total                                                   | 1289        | 35570       | 6.6             | (5.6-7.7)   |                                |              |                              |              |

\* Weighted to reflect each unit's duration of participation and probability of being sampled; confidence intervals take account of the clustered nature of the data.

† Restricted to women included in the adjusted analysis (who were not missing any potential confounder data).

‡ Adjusted for maternal age, ethnic group, understanding of English, marital/partner status, body mass index, Index of Multiple Deprivation score quintile, previous pregnancies  $\geq 24$  weeks, and gestation (completed weeks).

## **Appendix 9: The Birthplace in England Collaborative Group**

The Birthplace in England Collaborative Group includes the wider group of co-investigators, advisors, researchers, project staff and coordinating midwives who contributed to the research programme.

### **Co-investigators**

Professor Peter Brocklehurst, Professor of Perinatal Epidemiology, NPEU, University of Oxford  
Professor Alison Macfarlane, Professor of Perinatal Health, City University London  
Professor Neil Marlow, Professor of Neonatal Medicine, University College London  
Professor Rona McCandlish, Midwifery Professional Advisor, Chief Nursing Officer's Professional Leadership Team, Department of Health (on secondment from NPEU from February 2009)  
Professor Christine McCourt, Professor of Maternal and Child Health, City University London  
Alison Miller, Programme Director and Midwifery Lead, CMACE  
Mary Newburn, Head of Research and Information, NCT  
Professor Stavros Petrou, Professor of Health Economics, University of Warwick  
Dr Maggie Redshaw, Social Scientist, NPEU, University of Oxford  
Professor Jane Sandall, Professor of Women's Health and Programme Director (Innovations), NIHR King's Patient Safety and Service Quality Research Centre, King's College, London  
Louise Silverton, Deputy General Secretary, Royal College of Midwives

### **Birthplace Advisory group**

Professor Cathy Warwick (Chair, 2007-2008), King's College Hospital Foundation Trust  
Kate Sallah (Chair, 2008-2011), Tashie Consulting  
Jill Demilew (Deputy Chair), Consultant Midwife, Kings College Hospital Foundation Trust  
Professor Maggie Blott, Vice President, Royal College of Obstetricians and Gynaecologists  
Professor David Richmond, Vice President, Royal College of Obstetricians and Gynaecologists  
Sue Eardley, Children and Maternity Strategy and Safeguarding Care Quality Commission  
Professor Naomi Fulop, School of Social Science and Public Policy, King's College, London  
Dr Gary Hartnoll, Consultant Neonatologist, Chelsea and Westminster Hospital  
Dr Sara Kenyon, Senior Lecturer, School of Health and Population Studies, University of Birmingham  
Professor Gwyneth Lewis, National Clinical Lead for Maternal Health and Maternity Services, Department of Health, and Director of the Maternal Deaths Enquiry, CMACE  
Mandy Forrester, Midwifery Advisor, Nursing and Midwifery Council  
Christina McKenzie, Head of Midwifery, Nursing and Midwifery Council  
Maddie McMahon, Cambridge Maternity Services Liaison Committee  
Sue Allen-Mills, Cambridge Maternity Services Liaison Committee  
Gail McConnell, former Chair of the Barnet, Enfield and Haringey Maternity Services Liaison Committee  
Jane Walker, Consultant Midwife, Homerton University Hospital NHS Foundation Trust

### **Researchers**

Dr Jennifer Hollowell, Epidemiologist, NPEU, University of Oxford  
Nishma Patel, Health Economist, NPEU, University of Oxford  
David Puddicombe, Researcher/Epidemiologist, NPEU, University of Oxford  
Dr Susanna Rance, Researcher, King's College, London  
Dr Juliet Rayment, Researcher, City University  
Rachel Rowe, Researcher and NIHR Researcher Development Award Holder, NPEU, University of Oxford  
Liz Schroeder, Health Economist, NPEU, University of Oxford  
Dr Mary Stewart, National Lead Research Midwife, NPEU, University of Oxford

**Statisticians (prospective cohort study)**

Pollyanna Hardy, Senior Trials Statistician, NPEU, University of Oxford  
Louise Linsell, Senior Medical Statistician, NPEU, University of Oxford

**NPEU project team**

Elizabeth Bosiak, NPEU, Data Coordinator  
Magdalena Gallagher, Data Manager, NPEU, University of Oxford  
Dr Bob Gatton, Programmer, NPEU, University of Oxford  
Mary Logan, Project Manager, NPEU, University of Oxford  
Virginia Roncaglione, NPEU, Data Coordinator

**Regional Lead Midwives (prospective cohort study)**

Kate Brintworth (London)  
Chelsea McDonough (North)  
Catherine Melvin (North)  
Carol Puckett (South West)  
Laura Stewart-Maunder (South East and Central)  
Catherine Walton (London)

**Local Coordinating Midwives (prospective cohort study)**

Deborah Tunney, Amanda Wright (Airedale NHS Trust); Liz Cox, Emer Kelly, Julia Lidderdale, (Ashford and St Peters Hospitals NHS Trust); Margo Sherman (Barking, Havering And Redbridge Hospitals NHS Trust); Denise Cohen, Ann Fowler, Connie Froetschner, Cathy Rogers (Barnet and Chase Farm Hospitals NHS Trust); Sandra Newman, Janice Taylor, Claire Turner (Barnsley Hospital NHS Foundation Trust); Miriam Martin, Penny McVey (Barts And The London NHS Trust); Nhlanhla Mguni (Basildon And Thurrock University Hospitals NHS Foundation Trust); Nicola Brown (Basingstoke and North Hampshire NHS Foundation Trust); Rebecca Daniels (Bedford Hospital NHS Trust); Louise Wilde (Birmingham Women's Health Care NHS Trust); Ian Kemp (Blackpool, Fylde And Wyre Hospitals NHS Trust); Jayne Mulligan, Annabel Nicholas (Bolton Hospital NHS Trust); Becky Airey, Diane Farrar (Bradford Teaching Hospitals NHS Foundation Trust); Maureen Quin (Brighton And Sussex University Hospitals NHS Trust); Tracey Payne (Buckinghamshire Hospitals NHS Trust); Denise Austin, Jo Baxter (Burton Hospitals NHS Trust); Kath Kershaw, Rachel Newport, Sue Townend (Calderdale and Huddersfield NHS Foundation Trust); Jane Ford (Cambridge University Hospitals NHS Foundation Trust); Susan Woods (Central Manchester and Manchester Children's University Hospitals NHS Trust); Linda Gustard (Chesterfield Royal Hospital NHS Foundation Trust); Amanda Bargh, Eileen Walton (City Hospitals Sunderland NHS Foundation Trust); Sue Armstrong (Colchester Hospitals University NHS Foundation Trust); Di Langhorn (Countess Of Chester Hospital NHS Foundation Trust); Sandra Bohill, Beverley Corner, Jackie Hendy, Jackie Hogg, Barbara Payne (County Durham and Darlington NHS Foundation Trust); Sara Carcary, Trish Hamblin, Sandra Matthews (Dartford And Gravesham NHS Trust); Sharon Wallis (Derby Hospitals NHS Foundation Trust); Marel McDonald, Cathy Shaw (Doncaster And Bassetlaw Hospitals NHS Foundation Trust); Andrea Batty, Gill Cheadle (Dudley Group Of Hospitals NHS Trust); Grace Lee, Sarah Moffat (Ealing Hospital NHS Trust); Bev Clark, Gillian Locke (East And North Hertfordshire NHS Trust); Louise Yusuf (East Cheshire NHS Trust); Niloufar Hajilou, Melissa Howard (East Kent Hospitals NHS Trust); Cathie Melvin (East Lancashire Hospitals NHS Trust); Rebecca Beedell, Debbie Gowers, Francis Moffat, Alison Newby, Nicky Smith, Natalie Wolfe (East Sussex Hospitals NHS Trust); Andrea Cox, Maria Mills Shaw, Sara Wright (Epsom and St Helier University Hospitals NHS Trust); Jaime Sutherland (Frimley Park Hospital NHS Foundation Trust); Amanda Brown (Gateshead Health NHS Foundation Trust); Karen Davies, Linda Edwards, Annette Harbour (George Eliot Hospital NHS Trust); Sally Unwin (Gloucestershire Hospitals NHS Foundation Trust); Michelle Poole (Gloucestershire PCT); Saliene Campbell, Jan Powell (Guy's and St Thomas' NHS Foundation Trust); Nicola Bellerby (Harrogate and District NHS Foundation Trust); Elaine Gahir (Heart of England NHS Foundation Trust); Frances Burt, Ros McDonnell

(Heatherwood And Wexham Park Hospitals NHS Trust); Dawn Morris, Kay Pritchard (Hereford Hospitals NHS Trust); Jane Blyth (Hillingdon Hospital NHS Trust (The)); Lesley Alexander (Hinchingsbrooke Health Care NHS Trust); Audrey Crawford (Homerton University Hospital NHS Foundation Trust); Abigail Hill, Dawn Ward (Hull And East Yorkshire Hospitals NHS Trust); Sarah Cryan, Debbie Kemp, Cariosa Murray (Imperial College Healthcare NHS Trust); Ruth Redgrave (Ipswich Hospital NHS Trust); Amanda Rendell (Isle of Wight NHS Primary Care Trust); Gill Haliwell, Fiona Miles, Helen Smith (James Paget University Hospitals NHS Foundation Trust); Margaret Chinhoi, Jane Grant, Alison Whitwham (Kings College Hospital NHS Foundation Trust); Barbara Newman (Kingston Hospital NHS Trust); Katrina Rigby (Lancashire Teaching Hospitals NHS Foundation Trust); Jo Anker, Sue Corke, Gemma Hope, Janette Kirk, Coral Morby (Leeds Teaching Hospitals NHS Trust); Nahimatu Morton (Lewisham Hospital NHS Trust); Chelsea McDonough, Karen Comber, Joyce Davies (Liverpool Women's Hospital NHS Foundation Trust); Alison Heywood (Luton and Dunstable Hospital NHS Foundation Trust); Briony Beaumont, Gillian Duffey, Andrea Teasdale (Maidstone And Tunbridge Wells NHS Trust); Dorothy Turner (Mayday Healthcare NHS Trust); Marion Baker (Medway NHS Trust); Elizabeth Price (Mid Cheshire Hospitals NHS Trust); Nicola Bennett, Marianne Macrae, Lisa Trickey (Mid Essex Hospital Services NHS Trust); Katie Twigg, Karen White (Mid Staffordshire General Hospitals NHS Trust); Claire Hanson, Shirley Leonard (Mid Yorkshire Hospitals NHS Trust); Esther Valentine (Milton Keynes General Hospital NHS Trust); Claire Davenport (Newcastle Upon Tyne Hospitals NHS Foundation Trust); Elaine Carter, Tanisha Okoli (Newham University Hospital NHS Trust); Sarah Ardizzzone, Deborah Caine, Wendy Wilson (Norfolk And Norwich University Hospital NHS Trust); Katherine Allen, Helen Onuora (North Bristol NHS Trust); Sarah Hall, Anna McSkeane, Ruth Singleton (North Cumbria Acute Hospitals NHS Trust); Alison Oldfield (North Middlesex University Hospital NHS Trust); Margaret Appleton (North Tees And Hartlepool NHS Trust); Maria Harrington, Trixie McAree (North West London Hospitals NHS Trust); Joanne Woodward (Northampton General Hospital NHS Trust); Susan Feuchtwanger (Northern Devon Healthcare NHS Trust); Julie Shaw (Northern Lincolnshire And Goole Hospitals NHS Trust); Rixt Finigan, Margaret Fittes, Geraldine McKay, Debbie Nicholson, Lisa Routledge, Kerry Rushton (Northumbria Health Care NHS Foundation Trust); Louise Dolby (Nottingham City PCT); Linda Allan, Rebecca Hales, Alison Sangwine, Laura Stewart-Maunder, Nicki Wiggins, Carolyn Willis (Oxford Radcliffe Hospitals NHS Trust); Vicki Brooks, Sheila Murray, Cat Partridge, Laura Scragg (Pennine Acute Hospitals NHS Trust); Diane Lynch, Debbie Waters (Peterborough and Stamford Hospitals NHS Foundation Trust); Tracey Sargent (Plymouth Hospitals NHS Trust); Sally Loven, Diane Maunder (Poole Hospital NHS Trust); Sarah Backhouse, Sally Evans, Vicky Hassell, Pat Mooney, Jill O'Sullivan, Mary Taylor (Portsmouth Hospitals NHS Trust); Sue Chisholm (Princess Alexandra Hospital NHS Trust); Stephanie Pease (Queen Elizabeth Hospital Kings Lynn NHS Trust); Trudy Hutson (Rotherham NHS Foundation Trust); Amanda Leeks, Catherine Verrecchia (Royal Berkshire NHS Foundation Trust); Audrey Wareham (Royal Bournemouth & Christchurch Hospitals NHS Foundation Trust); Helen Ross McGill (Royal Cornwall Hospitals NHS Trust); Teresa Ashford, Morwenna Marchant, Gwenllian Riall, Wendy Seddon (Royal Devon and Exeter NHS Foundation Trust); Elina Satokangas, Donna Thornley (Royal Free Hampstead NHS Trust); Rebecca Greenacre (Royal Surrey County Hospital NHS Trust); Kate Cheshire (Royal Wolverhampton Hospitals NHS Trust); Gillian Furey, Kay Murray (Salford Royal NHS Foundation Trust); Sue Fenwick (Salisbury NHS Foundation Trust); Esther Rackley, Sidonie Williams (Sandwell And West Birmingham Hospitals NHS Trust); Jane Millar (Scarborough And North East Yorkshire Health Care NHS Trust); Helen Baston (Sheffield Teaching Hospitals NHS Foundation Trust); Amanda Tucker (Sherwood Forest Hospitals NHS Trust); Louise Davies, Gail Edwards, Carolyn Forbes, Evelyn Hughes, Lisa Parton, Shirley Prince, Steph Taylor-Hodge, Laura Thomas, Sandy Ward (Shrewsbury and Telford Hospital NHS Trust); Jenny Walter (South Devon Healthcare NHS Trust); Elizabeth Anderson, Rosanne Gunn-Russell, Justine McGrady, Helen Taylor (South London Healthcare NHS Trust); Sue Symonds (South Tees Hospitals NHS Trust); Linda McNamee (South Tyneside NHS Foundation Trust); Deirdre Barrett, Sue Lambert (South Warwickshire General Hospitals NHS Trust); Katy Head, Sarah McCauley (Southampton University Hospitals NHS Trust); Tina Nugent (Southend University Hospital NHS Foundation Trust); Catherine Boyle (Southport and Ormskirk Hospital NHS Trust); Rixa Von Dem Bussche, Fui Chin (St George's Healthcare NHS Trust); Caroline Cunningham (St Helen's and Knowsley Hospitals NHS Trust); Sheila Horrocks, Jo Thompson (Stockport NHS Foundation Trust); Maureen Royds-Jones (Surrey and Sussex Healthcare NHS Trust); Sandy

Richards (Swindon and Marlborough NHS Trust); Amanda Fletcher (Tameside and Glossop Acute Services NHS Trust); Siew Gin Bunce, Jan Davies, Carol Puckett, Pip Quinn (Taunton and Somerset NHS Trust); Libby Grooby, Dawn Thomas, Helen Ward (United Lincolnshire Hospitals NHS Trust); Jackie Baxter, Helle Nygaard (University College London Hospitals NHS Foundation Trust); Julie Eaton (University Hospital of North Staffordshire NHS Trust); Jen Pietroni (University Hospitals Bristol NHS Foundation Trust); Liz Bailey, Angela Bradley, Joanne Duffy (University Hospitals Coventry and Warwickshire NHS Trust); Andrea Dziemianko, Molly Patterson (University Hospitals of Leicester NHS Trust); Liz Gibbons, Julie Wren (University Hospitals of Morecambe Bay NHS Trust); Sue Davies, Lynne Serrage (University Hospitals of South Manchester NHS Foundation Trust); Linda Ball (Walsall Hospitals NHS Trust); Jude Haslam, Beverley Jessop (Warrington & Halton Hospital NHS Foundation Trust); Liz Murrell (West Dorset General Hospitals NHS Trust); Nora Lucey (West Hertfordshire Hospitals NHS Trust); Po Ying Li, Henrietta Nheta (West Middlesex University Hospital NHS Trust); Karen Bassingthwaighe (West Suffolk Hospitals NHS Trust); Kelly Pierce (Western Sussex Hospital NHS Trust); Christina McLaughlin (Weston Area Health NHS Trust); Kehinde Ayeni-Yegbe, Maria Gabas, Nobukhosi Kumson (Whipps Cross University Hospital NHS Trust); Nuala Hammond Norris, Leanne O'Shaughnessy (Whittington Hospital NHS Trust); Lorraine Blench, Anne Clark, Michelle Dugmore, Katherine Ford, Sue Forrester (Wiltshire PCT); Cindy Shawley (Winchester and Eastleigh Healthcare NHS Trust); Paula Brown, Sue Edwards (Wirral Hospital NHS Trust); Tamzyn Hyde, Jackie Lines, Susan Tabberer, Kay Watson (Worcestershire Acute Hospitals NHS Trust); Sandy Clayden (Worthing and Southlands Hospitals NHS Trust); Lesley Price (Wrightington, Wigan and Leigh NHS Trust); Angie Soughton (Yeovil District Hospital NHS Foundation Trust); Kath Thompson (York Hospitals NHS Trust)

## Appendix references

1. Office for National Statistics. Birth statistics: Births and patterns of family building England and Wales 2007 (Series FM1, No. 36 )2008.
2. Department of Health. Changing Childbirth, Part 1: Report of the Expert Maternity Group. London: 1993.
3. Department of Health. National Service Framework for Children, Young People and Maternity Services. Standard 11: Maternity Services. London: 2004.
4. Department of Health/Partnerships for Children Families and Maternity. Maternity Matters: Choice, access and continuity of care in a safe service. London: 2007.
5. Campbell R, Macfarlane A. Place of delivery: a review. *Br J Obstet Gynaecol.* 1986 Jul;93(7):675-83.
6. Campbell R, Macfarlane A. Where to be Born? The debate and the evidence. 2nd ed. Oxford: National Perinatal Epidemiology Unit; 1994.
7. MIDIRS. Place of Birth Informed Choice Leaflet. Bristol: 2005.
8. Stewart M, McCandlish R, Henderson J, Brocklehurst P. Review of evidence about clinical, psychosocial and economic outcomes for women with straightforward pregnancies who plan to give birth in a midwife-led birth centre, and outcomes for their babies. Report of a structured review of birth centre outcomes. Revised 2005. Oxford: National Perinatal Epidemiology Unit: 2004.
9. Olsen O, Jewell MD. Home versus hospital birth. *Cochrane Database of Systematic Reviews.* 1998(3):CD000352.
10. Olsen O. Meta-analysis of the safety of home birth. *Birth.* 1997 Mar;24(1):4-13.
11. de Jonge A, van der Goes BY, Ravelli AC, Amelink-Verburg MP, Mol BW, Nijhuis JG, et al. Perinatal mortality and morbidity in a nationwide cohort of 529,688 low-risk planned home and hospital births. *BJOG.* 2009 Aug;116(9):1177-84.
12. Janssen PA, Saxell L, Page LA, Klein MC, Liston RM, Lee SK. Outcomes of planned home birth with registered midwife versus planned hospital birth with midwife or physician. *CMAJ.* 2009 Sep 15;181(6-7):377-83.
13. Lindgren HE, Radestad IJ, Christensson K, Hildingsson IM. Outcome of planned home births compared to hospital births in Sweden between 1992 and 2004. A population-based register study. *Acta Obstet Gynecol Scand.* 2008;87(7):751-9.
14. Mori R, Dougherty M, Whittle M. An estimation of intrapartum-related perinatal mortality rates for booked home births in England and Wales between 1994 and 2003. *BJOG.* 2008 Apr;115(5):554-9.
15. Wax JR, Lucas FL, Lamont M, Pinette MG, Cartin A, Blackstone J. Maternal and newborn outcomes in planned home birth vs planned hospital births: a metaanalysis. *Am J Obstet Gynecol.* 2010 Sep;203(3):243 e1-8.
16. Gyte G, Dodwell M, Newburn M, Sandall J, Macfarlane A, Bewley S. Safety of planned home births. Findings of meta-analysis cannot be relied on. *BMJ.* 2010;341:c4033.
17. Department of Health. Improvement, expansion and reform - the next 3 years: priorities and planning framework 2003-2006: Department of Health: 2002.
18. Hodnett ED, Downe S, Walsh D, Weston J. Alternative versus conventional institutional settings for birth. *Cochrane Database Syst Rev.* 2010;9:CD000012.
19. Walsh D, Downe SM. Outcomes of free-standing, midwife-led birth centers: a structured review. *Birth.* 2004 Sep;31(3):222-9.
20. National Collaborating Centre for Women's and Children's Health. Intrapartum care: care of healthy women and their babies during childbirth. London: 2007.
21. McCandlish R, Rowe R. The Birthplace in England Research Programme Report of Component Study 1: Terms and Definitions. 2007; Available from: <https://www.npeu.ox.ac.uk/birthplace/component-studies/tdc>.
22. Dorling D. The North-South Divide. University of Sheffield; 2007 [12 October 2007]; Available from: <http://sasi.group.shef.ac.uk/maps/nsdivide/index.html>.
23. Healthcare Commission. Towards better births: A review of maternity services in England. London: Commission for Healthcare Audit and Inspection: 2008.
24. Maternity Care Working Party. Making normal birth a reality: NCT, RCM & RCOG: 2007.
25. Kurinczuk J, Barralett J, Redshaw M, Brocklehurst P. Monitoring the incidence of neonatal encephalopathy - what next? Report to the Patient Safety Research Programme. Oxford: NPEU: 2005.
26. McCandlish R, Bowler U, van Asten H, Berridge G, Winter C, Sames L, et al. A randomised controlled trial of care of the perineum during second stage of normal labour. *Br J Obstet Gynaecol.* 1998 Dec;105(12):1262-72.

27. Rogers J, Wood J, McCandlish R, Ayers S, Truesdale A, Elbourne D. Active versus expectant management of third stage of labour: the Hinchingsbrooke randomised controlled trial. *Lancet*. 1998 Mar 7;351(9104):693-9.
28. NICE. Obesity: guidance on the prevention, identification, assessment and management of overweight and obesity in adults and children. NICE; 2006.
29. Gray R, Headley J, Oakley L, Kurinczuk J, Brocklehurst P, Hollowell J. Inequalities in infant mortality project briefing paper 3. Towards an understanding of variations in infant mortality rates between different ethnic groups. Oxford: National Perinatal Epidemiology Unit, 2009.
30. Normand SLT, Landrum MB, Guadagnolia EA, J. Z. , Ryand TJ, Cleary PD, McNeila BJ. Validating recommendations for coronary angiography following acute myocardial infarction in the elderly:: A matched analysis using propensity scores. *Journal of clinical epidemiology*. 2001;54(4):387-98.
